# Supplementary material for: Resistance to Pyrrolobenzodiazepine Dimers Is Associated with SLFN11 Downregulation and Can Be Reversed through Inhibition of ATR
Source: Oxford University Press journal article supplement (doi:10.1158/1535-7163.mct-20-0351), 2021-03-01
Supplement: 15357163mct200351-sup-242450_2_supp_6779149_ql5flp.docx [file 15357163mct200351-sup-242450_2_supp_6779149_ql5flp.docx]

**Supplementary Table S1.** Differentially expressed proteins identified in the 361-PBDr cell line (Log2 fold-change ≥ 0.45 or ≤ - 0.45, -Log10 *p* < 0.05)

| Accession | Protein description | aCoverage | Gene ID | bLog2 fold-change | |
| --- | --- | --- | --- | --- | --- |
| P25815 | Protein S100-P | 49 | S100P | | 4.03 |
| P52895 | Aldo-keto reductase family 1 member C2 | 51 | AKR1C2 | | 3.73 |
| P26447 | Protein S100-A4 | 37 | S100A4 | | 3.38 |
| O60218 | Aldo-keto reductase family 1 member B10 | 27 | AKR1B10 | | 3.34 |
| Q8N3Y7 | Epidermal retinol dehydrogenase 2 | 12 | SDR16C5 | | 3.18 |
| A0A0A0MSS8 | Aldo-keto reductase family 1 member C3 | 41 | AKR1C3 | | 3.02 |
| O14684 | Prostaglandin E synthase | 11 | PTGES | | 2.85 |
| P05060 | Secretogranin-1 | 48 | CHGB | | 2.82 |
| O00116 | Alkyldihydroxyacetonephosphate synthase, peroxisomal | 48 | AGPS | | 2.76 |
| P09382 | Galectin-1 | 24 | LGALS1 | | 2.71 |
| J3KNW2 | Variable charge X-linked protein 1 | 10 | VCX | | 2.59 |
| P46821 | Microtubule-associated protein 1B | 24 | MAP1B | | 2.49 |
| A0A087WVD1 | Leukocyte receptor cluster member 9 | 16 | LENG9 | | 2.47 |
| Q16719 | Kynureninase | 41 | KYNU | | 2.46 |
| P29373 | Cellular retinoic acid-binding protein 2 | 45 | CRABP2 | | 2.45 |
| O75764 | Transcription elongation factor A protein 3 | 37 | TCEA3 | | 2.36 |
| Q03169 | Tumor necrosis factor alpha-induced protein 2 | 4 | TNFAIP2 | | 2.33 |
| P08493 | Matrix Gla protein | 26 | MGP | | 2.24 |
| I3L3I9 | Aldehyde dehydrogenase, dimeric NADP-preferring | 3 | ALDH3A1 | | 2.23 |
| Q16658 | Fascin | 33 | FSCN1 | | 2.22 |
| Q9BQL6 | Fermitin family homolog 1 | 6 | FERMT1 | | 2.21 |
| P21397 | Amine oxidase [flavin-containing] A | 26 | MAOA | | 2.15 |
| Q9UKE5 | TRAF2 and NCK-interacting protein kinase | 14 | TNIK | | 2.13 |
| Q8NBJ4 | Golgi membrane protein 1 | 55 | GOLM1 | | 2.09 |
| E5RFU2 | Bifunctional epoxide hydrolase 2 | 15 | EPHX2 | | 2.09 |
| P12277 | Creatine kinase B-type | 49 | CKB | | 2.08 |
| Q8N5S9 | Calcium/calmodulin-dependent protein kinase kinase 1 | 5 | CAMKK1 | | 2.07 |
| A0A0J9YX05 | Dystonin, isoform CRA_l (Fragment) | 8 | DST | | 2.07 |
| P06731 | Carcinoembryonic antigen-related cell adhesion molecule 5 | 17 | CEACAM5 | | 2.05 |
| O43657 | Tetraspanin-6 | 16 | TSPAN6 | | 2.03 |
| P23141 | Liver carboxylesterase 1 | 39 | CES1 | | 2.01 |
| Q9UNN8 | Endothelial protein C receptor | 5 | PROCR | | 1.99 |
| O95864 | Fatty acid desaturase 2 | 20 | FADS2 | | 1.98 |
| P27144 | Adenylate kinase 4, mitochondrial | 27 | AK4; LOC100507855 | | 1.96 |
| P34741 | Syndecan-2 | 10 | SDC2 | | 1.94 |
| P05455 | Lupus La protein | 61 | SSB | | 1.91 |
| O60637 | Tetraspanin-3 | 15 | TSPAN3 | | 1.9 |
| P09601 | Heme oxygenase 1 | 47 | HMOX1 | | 1.89 |
| P52429 | Diacylglycerol kinase epsilon | 7 | DGKE | | 1.88 |
| O14841 | 5-oxoprolinase | 9 | OPLAH | | 1.86 |
| O95294 | RasGAP-activating-like protein 1 | 15 | RASAL1 | | 1.86 |
| P37268 | Squalene synthase | 53 | FDFT1 | | 1.84 |
| O60635 | Tetraspanin-1 | 5 | TSPAN1 | | 1.83 |
| P29762 | Cellular retinoic acid-binding protein 1 | 33 | CRABP1 | | 1.8 |
| B8ZZC8 | Methyltransferase-like protein 5 | 16 | METTL5 | | 1.8 |
| Q7L5L3 | Lysophospholipase D GDPD3 | 23 | GDPD3 | | 1.79 |
| P15514 | Amphiregulin | 27 | AREG; AREGB | | 1.77 |
| Q96AD5 | Patatin-like phospholipase domain-containing protein 2 | 18 | PNPLA2 | | 1.77 |
| P56937 | 3-keto-steroid reductase | 24 | HSD17B7 | | 1.76 |
| Q8TEA8 | D-aminoacyl-tRNA deacylase 1 | 38 | DTD1 | | 1.75 |
| H7BY55 | Complement decay-accelerating factor | 12 | CD55 | | 1.75 |
| O95816 | BAG family molecular chaperone regulator 2 | 40 | BAG2 | | 1.74 |
| Q9NVH6 | Trimethyllysine dioxygenase, mitochondrial | 22 | TMLHE | | 1.74 |
| Q9Y6M1 | Insulin-like growth factor 2 mRNA-binding protein 2 | 11 | IGF2BP2 | | 1.71 |
| Q8NB16 | Mixed lineage kinase domain-like protein | 23 | MLKL | | 1.71 |
| Q8N1I0 | Dedicator of cytokinesis protein 4 | 2 | DOCK4 | | 1.69 |
| P14324 | Farnesyl pyrophosphate synthase | 20 | FDPS | | 1.69 |
| P11137 | Microtubule-associated protein 2 | 2 | MAP2 | | 1.69 |
| Q9BVA1 | Tubulin beta-2B chain | 58 | TUBB2B | | 1.69 |
| E9PCN2 | Guanylate cyclase soluble subunit beta-1 | 10 | GUCY1B3 | | 1.68 |
| Q96A23 | Copine-4 | 5 | CPNE4 | | 1.67 |
| P09327 | Villin-1 | 8 | VIL1 | | 1.67 |
| Q9UN76 | Sodium- and chloride-dependent neutral and basic amino acid transporter B(0+) | 8 | SLC6A14 | | 1.64 |
| P35637 | RNA-binding protein FUS | 19 | FUS | | 1.62 |
| O43772 | Mitochondrial carnitine/acylcarnitine carrier protein | 33 | SLC25A20 | | 1.61 |
| P37802 | Transgelin-2 | 79 | TAGLN2 | | 1.61 |
| P01040 | Cystatin-A | 76 | CSTA | | 1.58 |
| H0YGR4 | Oligoribonuclease, mitochondrial (Fragment) | 23 | REXO2 | | 1.58 |
| Q13085 | Acetyl-CoA carboxylase 1 | 39 | ACACA | | 1.57 |
| Q15118 | [Pyruvate dehydrogenase (acetyl-transferring)] kinase isozyme 1, mitochondrial | 15 | PDK1 | | 1.57 |
| P50238 | Cysteine-rich protein 1 | 31 | CRIP1 | | 1.56 |
| P52566 | Rho GDP-dissociation inhibitor 2 | 50 | ARHGDIB | | 1.55 |
| F8VU90 | Peptidylprolyl isomerase | 26 | FKBP11 | | 1.55 |
| Q16739 | Ceramide glucosyltransferase | 12 | UGCG | | 1.52 |
| P54855 | UDP-glucuronosyltransferase 2B15 | 7 | UGT2B15 | | 1.52 |
| Q9BXW9 | Fanconi anemia group D2 protein | 16 | FANCD2 | | 1.51 |
| Q6IN84 | rRNA methyltransferase 1, mitochondrial | 10 | MRM1 | | 1.51 |
| O60930 | Ribonuclease H1 | 7 | RNASEH1 | | 1.5 |
| Q9Y281 | Cofilin-2 | 37 | CFL2 | | 1.49 |
| P48506 | Glutamate--cysteine ligase catalytic subunit | 46 | GCLC | | 1.49 |
| Q08357 | Sodium-dependent phosphate transporter 2 | 10 | SLC20A2 | | 1.47 |
| P15941 | Mucin-1 | 7 | MUC1 | | 1.44 |
| P30041 | Peroxiredoxin-6 | 75 | PRDX6 | | 1.44 |
| Q14194 | Dihydropyrimidinase-related protein 1 | 29 | CRMP1 | | 1.43 |
| P36871 | Phosphoglucomutase-1 | 46 | PGM1 | | 1.43 |
| Q6PI48 | Aspartate--tRNA ligase, mitochondrial | 49 | DARS2 | | 1.41 |
| Q6PCE3 | Glucose 1,6-bisphosphate synthase | 20 | PGM2L1 | | 1.41 |
| R4GND1 | Ubiquitin-conjugating enzyme E2 E3 | 39 | UBE2E3 | | 1.41 |
| P04035 | 3-hydroxy-3-methylglutaryl-coenzyme A reductase | 13 | HMGCR | | 1.4 |
| Q92466 | DNA damage-binding protein 2 | 17 | DDB2 | | 1.39 |
| Q6ZS86 | Putative glycerol kinase 5 | 8 | GK5 | | 1.39 |
| E1P5H9 | Solute carrier organic anion transporter family member | 11 | SLCO4A1 | | 1.39 |
| P00492 | Hypoxanthine-guanine phosphoribosyltransferase | 45 | HPRT1 | | 1.38 |
| O43347 | RNA-binding protein Musashi homolog 1 | 11 | MSI1 | | 1.37 |
| E9PDF6 | Unconventional myosin-Ib | 37 | MYO1B | | 1.36 |
| Q96DC8 | Enoyl-CoA hydratase domain-containing protein 3, mitochondrial | 4 | ECHDC3 | | 1.35 |
| O00425 | Insulin-like growth factor 2 mRNA-binding protein 3 | 46 | IGF2BP3 | | 1.35 |
| A0A2R8Y504 | Epsilon-sarcoglycan | 4 | SGCE | | 1.35 |
| P41214 | Eukaryotic translation initiation factor 2D | 37 | EIF2D | | 1.34 |
| Q9NX58 | Cell growth-regulating nucleolar protein | 47 | LYAR | | 1.33 |
| Q9H825 | Methyltransferase-like protein 8 | 24 | METTL8 | | 1.33 |
| Q15800 | Methylsterol monooxygenase 1 | 13 | MSMO1 | | 1.33 |
| O75569 | Interferon-inducible double-stranded RNA-dependent protein kinase activator A | 47 | PRKRA | | 1.33 |
| Q96LR5 | Ubiquitin-conjugating enzyme E2 E2 | 34 | UBE2E2 | | 1.32 |
| Q8WU90 | Zinc finger CCCH domain-containing protein 15 | 54 | ZC3H15 | | 1.32 |
| Q9BXX3 | Ankyrin repeat domain-containing protein 30A | 6 | ANKRD30A | | 1.31 |
| Q9BXH1 | Bcl-2-binding component 3 | 11 | BBC3 | | 1.31 |
| Q6P6B1 | Glutamate-rich protein 5 | 8 | C8orf47; ERICH5 | | 1.3 |
| P21741 | Midkine | 48 | MDK | | 1.3 |
| Q7L592 | Protein arginine methyltransferase NDUFAF7, mitochondrial | 31 | NDUFAF7 | | 1.3 |
| A0AV02 | Solute carrier family 12 member 8 | 4 | SLC12A8 | | 1.3 |
| A0A2R8YCV2 | Uncharacterized protein | 22 | N/A | | 1.3 |
| O15427 | Monocarboxylate transporter 4 | 17 | SLC16A3 | | 1.29 |
| Q9BV57 | 1,2-dihydroxy-3-keto-5-methylthiopentene dioxygenase | 51 | ADI1 | | 1.28 |
| Q96BY6 | Dedicator of cytokinesis protein 10 | 1 | DOCK10 | | 1.28 |
| Q9NRW1 | Ras-related protein Rab-6B | 45 | RAB6B | | 1.28 |
| Q9ULX9 | Transcription factor MafF | 20 | MAFF | | 1.27 |
| Q7Z2T5 | TRMT1-like protein | 35 | TRMT1L | | 1.27 |
| P27708 | CAD protein | 41 | CAD | | 1.26 |
| Q9UI32 | Glutaminase liver isoform, mitochondrial | 8 | GLS2 | | 1.26 |
| Q9UJ83 | 2-hydroxyacyl-CoA lyase 1 | 10 | HACL1 | | 1.26 |
| Q9P032 | NADH dehydrogenase [ubiquinone] 1 alpha subcomplex assembly factor 4 | 50 | NDUFAF4 | | 1.26 |
| Q9BYT8 | Neurolysin, mitochondrial | 38 | NLN | | 1.26 |
| B8ZZU6 | Cyclic AMP-dependent transcription factor ATF-2 | 22 | ATF2 | | 1.26 |
| E9PK47 | Alpha-1,4 glucan phosphorylase | 20 | PYGL | | 1.26 |
| Q8IXB1 | DnaJ homolog subfamily C member 10 | 34 | DNAJC10 | | 1.25 |
| Q96HP4 | Oxidoreductase NAD-binding domain-containing protein 1 | 4 | OXNAD1 | | 1.25 |
| Q96ER3 | Protein SAAL1 | 22 | SAAL1 | | 1.25 |
| Q8IWE2 | Protein NOXP20 | 31 | FAM114A1 | | 1.24 |
| A0A0A0MRJ3 | Neuron navigator 1 | 10 | NAV1 | | 1.23 |
| O60701 | UDP-glucose 6-dehydrogenase | 62 | UGDH | | 1.23 |
| Q86WJ1 | Chromodomain-helicase-DNA-binding protein 1-like | 26 | CHD1L | | 1.22 |
| Q9UPQ0 | LIM and calponin homology domains-containing protein 1 | 24 | LIMCH1 | | 1.22 |
| P06401 | Progesterone receptor | 40 | PGR | | 1.22 |
| P10523 | S-arrestin | 2 | SAG | | 1.22 |
| Q9BQI0 | Allograft inflammatory factor 1-like | 21 | AIF1L | | 1.21 |
| P04083 | Annexin A1 | 46 | ANXA1 | | 1.21 |
| P15882 | N-chimaerin | 20 | CHN1 | | 1.21 |
| Q8N3D4 | EH domain-binding protein 1-like protein 1 | 7 | EHBP1L1 | | 1.21 |
| Q8TB36 | Ganglioside-induced differentiation-associated protein 1 | 16 | GDAP1 | | 1.21 |
| E9PDN5 | Dystrophin | 4 | DMD | | 1.21 |
| Q9Y295 | Developmentally-regulated GTP-binding protein 1 | 57 | DRG1 | | 1.2 |
| B7Z8R2 | Pentatricopeptide repeat-containing protein 2, mitochondrial | 11 | PTCD2 | | 1.2 |
| O00767 | Acyl-CoA desaturase | 18 | SCD | | 1.2 |
| Q9HBI1 | Beta-parvin | 19 | PARVB | | 1.19 |
| P52926 | High mobility group protein HMGI-C | 20 | HMGA2 | | 1.18 |
| Q9H4B0 | Probable tRNA N6-adenosine threonylcarbamoyltransferase, mitochondrial | 18 | OSGEPL1 | | 1.18 |
| Q99442 | Translocation protein SEC62 | 18 | SEC62 | | 1.18 |
| Q9NUQ9 | Protein FAM49B | 49 | FAM49B | | 1.17 |
| Q6F5E8 | Capping protein, Arp2/3 and myosin-I linker protein 2 | 1 | RLTPR; CARMIL2 | | 1.17 |
| Q6P087 | Mitochondrial mRNA pseudouridine synthase RPUSD3 | 26 | RPUSD3 | | 1.17 |
| Q86VW0 | SEC14 domain and spectrin repeat-containing protein 1 | 13 | SESTD1 | | 1.17 |
| Q99674 | Cell growth regulator with EF hand domain protein 1 | 27 | CGREF1 | | 1.16 |
| Q9UPQ8 | Dolichol kinase | 6 | DOLK | | 1.16 |
| Q15555 | Microtubule-associated protein RP/EB family member 2 | 34 | MAPRE2 | | 1.16 |
| Q99584 | Protein S100-A13 | 49 | S100A13 | | 1.16 |
| A0A087WYF8 | PDZ and LIM domain protein 3 | 12 | PDLIM3 | | 1.16 |
| Q68CQ4 | Digestive organ expansion factor homolog | 31 | DIEXF | | 1.15 |
| O75582 | Ribosomal protein S6 kinase alpha-5 | 17 | RPS6KA5 | | 1.15 |
| Q96BW9 | Phosphatidate cytidylyltransferase, mitochondrial | 17 | TAMM41 | | 1.15 |
| O94925 | Glutaminase kidney isoform, mitochondrial | 28 | GLS | | 1.14 |
| Q9UBI6 | Guanine nucleotide-binding protein G(I)/G(S)/G(O) subunit gamma-12 | 69 | GNG12 | | 1.14 |
| Q0VDG4 | Secernin-3 | 13 | SCRN3 | | 1.14 |
| P53985 | Monocarboxylate transporter 1 | 7 | SLC16A1 | | 1.14 |
| Q96HQ2 | CDKN2AIP N-terminal-like protein | 15 | CDKN2AIPNL | | 1.13 |
| Q5T1V6 | Probable ATP-dependent RNA helicase DDX59 | 3 | DDX59 | | 1.13 |
| Q8IZ40 | REST corepressor 2 | 11 | RCOR2 | | 1.13 |
| C9J5X9 | Fanconi anemia group B protein (Fragment) | 6 | FANCB | | 1.13 |
| Q07021 | Complement component 1 Q subcomponent-binding protein, mitochondrial | 41 | C1QBP | | 1.12 |
| A0A2R8Y653 | Uridine-cytidine kinase 2 | 31 | UCK2 | | 1.12 |
| Q08AD1 | Calmodulin-regulated spectrin-associated protein 2 | 13 | CAMSAP2 | | 1.11 |
| P54277 | PMS1 protein homolog 1 | 16 | PMS1 | | 1.11 |
| P32121 | Beta-arrestin-2 | 16 | ARRB2 | | 1.1 |
| Q9H7H0 | Methyltransferase-like protein 17, mitochondrial | 12 | METTL17 | | 1.1 |
| Q9NPA3 | Mid1-interacting protein 1 | 29 | MID1IP1 | | 1.1 |
| Q96I59 | Probable asparagine--tRNA ligase, mitochondrial | 16 | NARS2 | | 1.1 |
| P62166 | Neuronal calcium sensor 1 | 37 | NCS1 | | 1.1 |
| J3KND1 | Protein SAAL1 | 22 | SAAL1 | | 1.1 |
| Q14534 | Squalene monooxygenase | 23 | SQLE | | 1.1 |
| P30626 | Sorcin | 28 | SRI | | 1.1 |
| Q96Q11 | CCA tRNA nucleotidyltransferase 1, mitochondrial | 43 | TRNT1 | | 1.1 |
| Q9BY67 | Cell adhesion molecule 1 | 17 | CADM1 | | 1.09 |
| A6NIR2 | Chromosome 1 open reading frame 41, isoform CRA_b | 24 | HSPB11 | | 1.09 |
| P48681 | Nestin | 20 | NES | | 1.09 |
| Q9HC36 | rRNA methyltransferase 3, mitochondrial | 29 | RNMTL1; MRM3 | | 1.09 |
| P29353 | SHC-transforming protein 1 | 19 | SHC1 | | 1.09 |
| P35716 | Transcription factor SOX-11 | 15 | SOX11 | | 1.09 |
| A0A087WX23 | Retrotransposon-derived protein PEG10 | 29 | PEG10 | | 1.09 |
| A0A087X0P9 | Probable RNA polymerase II nuclear localization protein SLC7A6OS (Fragment) | 31 | SLC7A6OS | | 1.09 |
| P61289 | Proteasome activator complex subunit 3 | 48 | PSME3 | | 1.08 |
| P51692 | Signal transducer and activator of transcription 5B | 10 | STAT5B | | 1.08 |
| G3V3G9 | Uncharacterized protein | 23 | N/A | | 1.08 |
| Q9UDY4 | DnaJ homolog subfamily B member 4 | 28 | DNAJB4 | | 1.07 |
| Q99615 | DnaJ homolog subfamily C member 7 | 53 | DNAJC7 | | 1.07 |
| Q8WV74 | Nucleoside diphosphate-linked moiety X motif 8 | 16 | NUDT8 | | 1.07 |
| Q9P0V9 | Septin-10 | 33 | SEPT10. | | 1.07 |
| O75746 | Calcium-binding mitochondrial carrier protein Aralar1 | 42 | SLC25A12 | | 1.07 |
| C9J240 | Anion exchange protein | 11 | SLC4A10 | | 1.07 |
| Q11201 | CMP-N-acetylneuraminate-beta-galactosamide-alpha-2,3-sialyltransferase 1 | 25 | ST3GAL1 | | 1.07 |
| Q96B21 | Transmembrane protein 45B | 6 | TMEM45B | | 1.07 |
| Q16222 | UDP-N-acetylhexosamine pyrophosphorylase | 14 | UAP1 | | 1.07 |
| H0YDD4 | Acetyltransferase component of pyruvate dehydrogenase complex (Fragment) | 41 | DLAT | | 1.07 |
| Q9H6R7 | WD repeat and coiled-coil-containing protein | 5 | C2orf44; WDCP | | 1.06 |
| Q9BR61 | Acyl-CoA-binding domain-containing protein 6 | 23 | ACBD6 | | 1.05 |
| P50053 | Ketohexokinase | 5 | KHK | | 1.05 |
| A0A087WVR4 | Myc proto-oncogene protein | 4 | MYC | | 1.05 |
| C9J2P0 | Ubiquitin-conjugating enzyme E2 E1 (Fragment) | 41 | UBE2E1 | | 1.05 |
| Q92828 | Coronin-2A | 20 | CORO2A | | 1.04 |
| B7ZC38 | Endophilin-B2 | 38 | SH3GLB2 | | 1.04 |
| E9PFN4 | Anion exchange protein | 16 | SLC4A7 | | 1.04 |
| A0A096LNZ9 | Ubiquitin-like protein ISG15 (Fragment) | 38 | ISG15 | | 1.04 |
| Q96K12 | Fatty acyl-CoA reductase 2 | 14 | FAR2 | | 1.03 |
| Q96PY5 | Formin-like protein 2 | 8 | FMNL2 | | 1.03 |
| Q96MT1 | RING finger protein 145 | 3 | RNF145 | | 1.03 |
| Q13509 | Tubulin beta-3 chain | 45 | TUBB3 | | 1.03 |
| Q96GX8 | Uncharacterized protein C16orf74 | 32 | C16orf74 | | 1.02 |
| Q96GN5 | Cell division cycle-associated 7-like protein | 6 | CDCA7L | | 1.02 |
| Q8WUX2 | Glutathione-specific gamma-glutamylcyclotransferase 2 | 20 | CHAC2 | | 1.02 |
| F8VW96 | Cysteine and glycine-rich protein 2 | 18 | CSRP2 | | 1.02 |
| Q13423 | NAD(P) transhydrogenase, mitochondrial | 38 | NNT | | 1.02 |
| O15067 | Phosphoribosylformylglycinamidine synthase | 24 | PFAS | | 1.02 |
| Q9HAV7 | GrpE protein homolog 1, mitochondrial | 50 | GRPEL1 | | 1.01 |
| P35568 | Insulin receptor substrate 1 | 23 | IRS1 | | 1.01 |
| O95568 | Histidine protein methyltransferase 1 homolog | 15 | METTL18 | | 1.01 |
| Q8N954 | G patch domain-containing protein 11 | 18 | GPATCH11 | | 1.01 |
| C9J384 | Protein CMSS1 (Fragment) | 25 | CMSS1 | | 1.01 |
| Q6YN16 | Hydroxysteroid dehydrogenase-like protein 2 | 47 | HSDL2 | | 1 |
| Q9NU23 | LYR motif-containing protein 2 | 30 | LYRM2 | | 1 |
| Q9UHF7 | Zinc finger transcription factor Trps1 | 44 | TRPS1 | | 1 |
| Q9UKW4 | Guanine nucleotide exchange factor VAV3 | 8 | VAV3 | | 1 |
| F2Z2Y6 | U6 snRNA-associated Sm-like protein LSm8 | 49 | LSM8 | | 1 |
| Q9UPW5 | Cytosolic carboxypeptidase 1 | 3 | AGTPBP1 | | 0.99 |
| O60262 | Guanine nucleotide-binding protein G(I)/G(S)/G(O) subunit gamma-7 | 21 | GNG7 | | 0.99 |
| A0A0C4DFS6 | Protein sprouty homolog 4 | 32 | SPRY4 | | 0.99 |
| O60488 | Long-chain-fatty-acid--CoA ligase 4 | 21 | ACSL4 | | 0.98 |
| P27544 | Ceramide synthase 1 | 7 | CERS1 | | 0.98 |
| E9PMI6 | Methylosome subunit pICln | 53 | CLNS1A | | 0.98 |
| P49674 | Casein kinase I isoform epsilon | 25 | CSNK1E; LOC400927-CSNK1E | | 0.98 |
| Q8NFJ5 | Retinoic acid-induced protein 3 | 6 | GPRC5A | | 0.98 |
| Q7Z6M1 | Rab9 effector protein with kelch motifs | 18 | RABEPK | | 0.98 |
| P06703 | Protein S100-A6 | 36 | S100A6 | | 0.98 |
| Q7Z4G4 | tRNA (guanine(10)-N2)-methyltransferase homolog | 13 | TRMT11 | | 0.98 |
| Q14191 | Werner syndrome ATP-dependent helicase | 2 | WRN | | 0.98 |
| P51648 | Fatty aldehyde dehydrogenase | 30 | ALDH3A2 | | 0.97 |
| Q9UJA5 | tRNA (adenine(58)-N(1))-methyltransferase non-catalytic subunit TRM6 | 35 | TRMT6 | | 0.97 |
| Q9BRU9 | rRNA-processing protein UTP23 homolog | 27 | UTP23 | | 0.97 |
| H7C5H6 | ADP-ribosylation factor-like protein 6 (Fragment) | 37 | ARL6 | | 0.97 |
| E7ENU9 | Macrophage-capping protein (Fragment) | 11 | CAPG | | 0.97 |
| Q9BVP2 | Guanine nucleotide-binding protein-like 3 | 38 | GNL3 | | 0.96 |
| Q02108 | Guanylate cyclase soluble subunit alpha-1 | 11 | GUCY1A3 | | 0.96 |
| O14929 | Histone acetyltransferase type B catalytic subunit | 36 | HAT1 | | 0.96 |
| Q9H9L3 | Interferon-stimulated 20 kDa exonuclease-like 2 | 14 | ISG20L2 | | 0.96 |
| P05412 | Transcription factor AP-1 | 9 | JUN | | 0.96 |
| Q9Y5V3 | Melanoma-associated antigen D1 | 24 | MAGED1 | | 0.96 |
| Q5T160 | Probable arginine--tRNA ligase, mitochondrial | 21 | RARS2 | | 0.96 |
| Q96A58 | Ras-related and estrogen-regulated growth inhibitor | 38 | RERG | | 0.96 |
| P60903 | Protein S100-A10 | 18 | S100A10 | | 0.96 |
| Q96EN8 | Molybdenum cofactor sulfurase | 3 | MOCOS | | 0.95 |
| Q8IYS1 | Peptidase M20 domain-containing protein 2 | 37 | PM20D2 | | 0.95 |
| Q68CZ2 | Tensin-3 | 5 | TNS3 | | 0.95 |
| P0DPD7 | EEF1A lysine methyltransferase 4 | 8 | EEF1AKMT4 | | 0.95 |
| A0A1W2PR67 | Thioredoxin reductase 3 | 5 | TXNRD3 | | 0.95 |
| P48507 | Glutamate--cysteine ligase regulatory subunit | 32 | GCLM | | 0.94 |
| O96011 | Peroxisomal membrane protein 11B | 32 | LOC101060567; PEX11B | | 0.94 |
| Q14207 | Protein NPAT | 6 | NPAT | | 0.94 |
| Q9C010 | cAMP-dependent protein kinase inhibitor beta | 54 | PKIB | | 0.94 |
| A8MQ07 | Rap guanine nucleotide exchange factor 5 | 3 | RAPGEF5 | | 0.94 |
| Q99595 | Mitochondrial import inner membrane translocase subunit Tim17-A | 25 | TIMM17A | | 0.94 |
| Q5VVQ6 | Ubiquitin thioesterase OTU1 | 3 | YOD1 | | 0.94 |
| Q9BTT0 | Acidic leucine-rich nuclear phosphoprotein 32 family member E | 32 | ANP32E | | 0.93 |
| P49407 | Beta-arrestin-1 | 40 | ARRB1 | | 0.93 |
| Q9HCG8 | Pre-mRNA-splicing factor CWC22 homolog | 23 | CWC22 | | 0.93 |
| Q96N67 | Dedicator of cytokinesis protein 7 | 15 | DOCK7 | | 0.93 |
| P14923 | Junction plakoglobin | 62 | JUP | | 0.93 |
| Q15181 | Inorganic pyrophosphatase | 73 | PPA1 | | 0.93 |
| Q8IZE3 | Protein-associating with the carboxyl-terminal domain of ezrin | 14 | SCYL3 | | 0.93 |
| Q15526 | Surfeit locus protein 1 | 27 | SURF1 | | 0.93 |
| Q15645 | Pachytene checkpoint protein 2 homolog | 39 | TRIP13 | | 0.93 |
| P50607 | Tubby protein homolog | 9 | TUB | | 0.93 |
| Q9GZL7 | Ribosome biogenesis protein WDR12 | 31 | WDR12 | | 0.93 |
| Q8TDQ7 | Glucosamine-6-phosphate isomerase 2 | 31 | GNPDA2 | | 0.92 |
| Q8IVL6 | Prolyl 3-hydroxylase 3 | 9 | LEPREL2; P3H3 | | 0.92 |
| Q8NDX6 | Zinc finger protein 740 | 24 | ZNF740 | | 0.92 |
| A0A0A0MSD2 | Regulator of microtubule dynamics protein 2 | 2 | RMDN2 | | 0.92 |
| O15085 | Rho guanine nucleotide exchange factor 11 | 13 | ARHGEF11 | | 0.91 |
| Q9H7Z7 | Prostaglandin E synthase 2 | 53 | PTGES2 | | 0.91 |
| G3XAH0 | HCG2002594, isoform CRA_c | 12 | SEPT5. | | 0.91 |
| Q9P2M4 | TBC1 domain family member 14 | 8 | TBC1D14 | | 0.91 |
| Q8N3Z6 | Zinc finger CCHC domain-containing protein 7 | 5 | ZCCHC7 | | 0.91 |
| Q14CZ7 | FAST kinase domain-containing protein 3, mitochondrial | 6 | FASTKD3 | | 0.9 |
| Q8NFF5 | FAD synthase | 45 | FLAD1 | | 0.9 |
| O95983 | Methyl-CpG-binding domain protein 3 | 44 | MBD3 | | 0.9 |
| Q07820 | Induced myeloid leukemia cell differentiation protein Mcl-1 | 5 | MCL1 | | 0.9 |
| P23368 | NAD-dependent malic enzyme, mitochondrial | 34 | ME2 | | 0.9 |
| O15226 | NF-kappa-B-repressing factor | 39 | NKRF | | 0.9 |
| O76070 | Gamma-synuclein | 84 | SNCG | | 0.9 |
| Q9C040 | Tripartite motif-containing protein 2 | 12 | TRIM2 | | 0.9 |
| H7C3C4 | Anion exchange protein (Fragment) | 21 | SLC4A7 | | 0.9 |
| A0A087WXX9 | Non-specific serine/threonine protein kinase | 23 | PRKAA2 | | 0.9 |
| P21399 | Cytoplasmic aconitate hydratase | 45 | ACO1 | | 0.89 |
| Q9HB71 | Calcyclin-binding protein | 54 | CACYBP | | 0.89 |
| Q8TB45 | DEP domain-containing mTOR-interacting protein | 21 | DEPTOR | | 0.89 |
| A0A1C7CYX9 | Dihydropyrimidinase-related protein 2 | 41 | DPYSL2 | | 0.89 |
| Q7L4E1 | Mitoguardin 2 | 4 | FAM73B; MIGA2 | | 0.89 |
| Q5T7V8 | RAB6-interacting golgin | 10 | GORAB | | 0.89 |
| P17535 | Transcription factor jun-D | 23 | JUND | | 0.89 |
| Q96E11 | Ribosome-recycling factor, mitochondrial | 40 | MRRF | | 0.89 |
| Q8N183 | NADH dehydrogenase [ubiquinone] 1 alpha subcomplex assembly factor 2 | 50 | NDUFAF2 | | 0.89 |
| Q9NTK5 | Obg-like ATPase 1 | 69 | OLA1 | | 0.89 |
| Q9H9S3 | Protein transport protein Sec61 subunit alpha isoform 2 | 14 | SEC61A2 | | 0.89 |
| Q9NPD8 | Ubiquitin-conjugating enzyme E2 T | 22 | UBE2T | | 0.89 |
| Q9Y5K5 | Ubiquitin carboxyl-terminal hydrolase isozyme L5 | 57 | UCHL5 | | 0.89 |
| P30837 | Aldehyde dehydrogenase X, mitochondrial | 25 | ALDH1B1 | | 0.88 |
| P19525 | Interferon-induced, double-stranded RNA-activated protein kinase | 39 | EIF2AK2 | | 0.88 |
| Q96TC7 | Regulator of microtubule dynamics protein 3 | 23 | FAM82A2; RMDN3 | | 0.88 |
| Q5QNY5 | Peroxisomal biogenesis factor 19 (Fragment) | 59 | PEX19 | | 0.88 |
| O43395 | U4/U6 small nuclear ribonucleoprotein Prp3 | 39 | PRPF3 | | 0.88 |
| J3KQ48 | Peptidyl-tRNA hydrolase 2, mitochondrial | 61 | PTRH2 | | 0.88 |
| O43166 | Signal-induced proliferation-associated 1-like protein 1 | 5 | SIPA1L1 | | 0.88 |
| Q8N0X7 | Spartin | 8 | SPG20; SPART | | 0.88 |
| Q9UL52 | Transmembrane protease serine 11E | 16 | TMPRSS11E | | 0.88 |
| O96006 | Zinc finger BED domain-containing protein 1 | 4 | ZBED1 | | 0.88 |
| H0YHM7 | Peptidyl-prolyl cis-trans isomerase FKBP11 (Fragment) | 44 | FKBP11 | | 0.88 |
| Q96HJ9 | Protein FMC1 homolog | 27 | C7orf55; FMC1; C7orf55-LUC7L2 | | 0.87 |
| Q9BXW7 | Haloacid dehalogenase-like hydrolase domain-containing 5 | 42 | CECR5; HDHD5 | | 0.87 |
| Q53TN4 | Cytochrome b reductase 1 | 8 | CYBRD1 | | 0.87 |
| P52701 | DNA mismatch repair protein Msh6 | 45 | MSH6 | | 0.87 |
| Q9BT43 | DNA-directed RNA polymerase III subunit RPC7-like | 8 | POLR3GL; LOC101060555 | | 0.87 |
| O75663 | TIP41-like protein | 33 | TIPRL | | 0.87 |
| Q9HC07 | Transmembrane protein 165 | 25 | TMEM165 | | 0.87 |
| Q9NYL2 | Mitogen-activated protein kinase kinase kinase 20 | 16 | ZAK; MAP3K20 | | 0.87 |
| A6NGJ0 | Dynein light chain Tctex-type 3 | 11 | DYNLT3 | | 0.87 |
| H0Y9X1 | Translation machinery-associated protein 16 (Fragment) | 21 | TMA16 | | 0.87 |
| Q9BTE7 | DCN1-like protein 5 | 35 | DCUN1D5 | | 0.86 |
| Q14C86 | GTPase-activating protein and VPS9 domain-containing protein 1 | 35 | GAPVD1 | | 0.86 |
| Q9H4A5 | Golgi phosphoprotein 3-like | 22 | GOLPH3L | | 0.86 |
| I3L4Z6 | Golgi SNAP receptor complex member 2 | 37 | GOSR2 | | 0.86 |
| Q5JVS0 | Intracellular hyaluronan-binding protein 4 | 15 | HABP4 | | 0.86 |
| G3V167 | Poly [ADP-ribose] polymerase | 19 | PARP2 | | 0.86 |
| Q92733 | Proline-rich protein PRCC | 42 | PRCC | | 0.86 |
| A0A0A0MSA9 | Poliovirus receptor | 7 | PVR | | 0.86 |
| Q9BW92 | Threonine--tRNA ligase, mitochondrial | 27 | TARS2 | | 0.86 |
| Q8WVM0 | Dimethyladenosine transferase 1, mitochondrial | 37 | TFB1M | | 0.86 |
| Q86UB9 | Transmembrane protein 135 | 6 | TMEM135 | | 0.86 |
| Q99986 | Serine/threonine-protein kinase VRK1 | 36 | VRK1 | | 0.86 |
| A0A096LP22 | Probable peptidyl-tRNA hydrolase (Fragment) | 24 | PTRH1 | | 0.86 |
| O15439 | Multidrug resistance-associated protein 4 | 6 | ABCC4 | | 0.85 |
| Q9Y4X0 | AMME syndrome candidate gene 1 protein | 9 | AMMECR1 | | 0.85 |
| P53004 | Biliverdin reductase A | 36 | BLVRA | | 0.85 |
| Q86X95 | Corepressor interacting with RBPJ 1 | 15 | CIR1 | | 0.85 |
| Q8NEV8 | Exophilin-5 | 10 | EXPH5 | | 0.85 |
| Q9BW83 | Intraflagellar transport protein 27 homolog | 31 | IFT27 | | 0.85 |
| Q9UN81 | LINE-1 retrotransposable element ORF1 protein | 38 | LOC440264; L1RE1 | | 0.85 |
| Q9Y535 | DNA-directed RNA polymerase III subunit RPC8 | 29 | POLR3H | | 0.85 |
| V9GYM8 | Rho guanine nucleotide exchange factor 2 | 23 | ARHGEF2 | | 0.85 |
| Q9Y587 | AP-4 complex subunit sigma-1 | 14 | AP4S1 | | 0.84 |
| O43505 | Beta-1,4-glucuronyltransferase 1 | 13 | B3GNT1; B4GAT1 | | 0.84 |
| Q96TA1 | Niban-like protein 1 | 45 | FAM129B | | 0.84 |
| Q643R3 | Lysophospholipid acyltransferase LPCAT4 | 7 | LPCAT4 | | 0.84 |
| O60675 | Transcription factor MafK | 19 | MAFK | | 0.84 |
| Q15120 | [Pyruvate dehydrogenase (acetyl-transferring)] kinase isozyme 3, mitochondrial | 30 | PDK3 | | 0.84 |
| Q5T2R2 | Decaprenyl-diphosphate synthase subunit 1 | 5 | PDSS1 | | 0.84 |
| Q6P3X3 | Tetratricopeptide repeat protein 27 | 23 | TTC27 | | 0.84 |
| Q16881 | Thioredoxin reductase 1, cytoplasmic | 46 | TXNRD1 | | 0.84 |
| Q9Y2R0 | Cytochrome c oxidase assembly factor 3 homolog, mitochondrial | 36 | COA3 | | 0.83 |
| Q99543 | DnaJ homolog subfamily C member 2 | 38 | DNAJC2 | | 0.83 |
| Q01581 | Hydroxymethylglutaryl-CoA synthase, cytoplasmic | 31 | HMGCS1 | | 0.83 |
| P10636 | Microtubule-associated protein tau | 18 | MAPT | | 0.83 |
| Q15126 | Phosphomevalonate kinase | 48 | PMVK | | 0.83 |
| Q8TC44 | POC1 centriolar protein homolog B | 10 | POC1B | | 0.83 |
| Q9NXA8 | NAD-dependent protein deacylase sirtuin-5, mitochondrial | 43 | SIRT5 | | 0.83 |
| Q9BSE5 | Agmatinase, mitochondrial | 11 | AGMAT | | 0.82 |
| O14493 | Claudin-4 | 21 | CLDN4 | | 0.82 |
| Q9ULP0 | Protein NDRG4 | 8 | NDRG4 | | 0.82 |
| P05423 | DNA-directed RNA polymerase III subunit RPC4 | 25 | POLR3D | | 0.82 |
| O15318 | DNA-directed RNA polymerase III subunit RPC7 | 11 | POLR3G | | 0.82 |
| P31949 | Protein S100-A11 | 43 | S100A11 | | 0.82 |
| Q969Z0 | FAST kinase domain-containing protein 4 | 26 | TBRG4 | | 0.82 |
| Q8IYQ7 | Threonine synthase-like 1 | 8 | THNSL1 | | 0.82 |
| Q01831 | DNA repair protein complementing XP-C cells | 7 | XPC | | 0.82 |
| Q96QU8 | Exportin-6 | 16 | XPO6 | | 0.82 |
| Q13315 | Serine-protein kinase ATM | 4 | ATM | | 0.81 |
| P49366 | Deoxyhypusine synthase | 12 | DHPS | | 0.81 |
| P49321 | Nuclear autoantigenic sperm protein | 66 | NASP | | 0.81 |
| Q5TD07 | Ribosyldihydronicotinamide dehydrogenase [quinone] | 60 | NQO2 | | 0.81 |
| Q9NS91 | E3 ubiquitin-protein ligase RAD18 | 26 | RAD18 | | 0.81 |
| Q6RFH5 | WD repeat-containing protein 74 | 29 | WDR74 | | 0.81 |
| E7EP41 | Zinc finger protein 587 | 6 | ZNF587 | | 0.81 |
| Q8N8Q8 | Cytochrome c oxidase assembly protein COX18, mitochondrial | 13 | COX18 | | 0.8 |
| Q7L8L6 | FAST kinase domain-containing protein 5, mitochondrial | 23 | FASTKD5 | | 0.8 |
| A4D1E9 | GTP-binding protein 10 | 41 | GTPBP10 | | 0.8 |
| O00330 | Pyruvate dehydrogenase protein X component, mitochondrial | 27 | PDHX | | 0.8 |
| O15355 | Protein phosphatase 1G | 51 | PPM1G | | 0.8 |
| Q96PZ0 | Pseudouridylate synthase 7 homolog | 43 | PUS7 | | 0.8 |
| P61221 | ATP-binding cassette sub-family E member 1 | 47 | ABCE1 | | 0.79 |
| Q9H3K6 | BolA-like protein 2 | 70 | BOLA2B; BOLA2; LOC107984053 | | 0.79 |
| Q9NWQ9 | Uncharacterized protein C14orf119 | 9 | C14orf119 | | 0.79 |
| P17676 | CCAAT/enhancer-binding protein beta | 22 | CEBPB | | 0.79 |
| Q14126 | Desmoglein-2 | 36 | DSG2 | | 0.79 |
| O15091 | Mitochondrial ribonuclease P catalytic subunit | 34 | KIAA0391 | | 0.79 |
| Q6UWE0 | E3 ubiquitin-protein ligase LRSAM1 | 31 | LRSAM1 | | 0.79 |
| Q8IUF8 | Ribosomal oxygenase 2 | 11 | MINA; RIOX2 | | 0.79 |
| Q96E29 | Transcription termination factor 3, mitochondrial | 24 | MTERFD1; MTERF3 | | 0.79 |
| Q9BQG0 | Myb-binding protein 1A | 41 | MYBBP1A | | 0.79 |
| Q9NWU1 | 3-oxoacyl-[acyl-carrier-protein] synthase, mitochondrial | 16 | OXSM | | 0.79 |
| B4DFJ1 | cDNA FLJ53728, highly similar to TERF1-interacting nuclear factor 2 | 3 | TINF2 | | 0.79 |
| Q5JU69 | Torsin-2A | 9 | TOR2A | | 0.79 |
| P43897 | Elongation factor Ts, mitochondrial | 50 | TSFM | | 0.79 |
| A0A1B0GUA3 | KIF1-binding protein | 36 | KIF1BP | | 0.79 |
| A0A087WW65 | ATP-binding cassette sub-family B member 7, mitochondrial | 16 | ABCB7 | | 0.78 |
| P53396 | ATP-citrate synthase | 53 | ACLY | | 0.78 |
| Q96GX9 | Methylthioribulose-1-phosphate dehydratase | 21 | APIP | | 0.78 |
| Q9UBB4 | Ataxin-10 | 46 | ATXN10 | | 0.78 |
| P25311 | Zinc-alpha-2-glycoprotein | 37 | AZGP1 | | 0.78 |
| Q14012 | Calcium/calmodulin-dependent protein kinase type 1 | 12 | CAMK1 | | 0.78 |
| Q9UHD1 | Cysteine and histidine-rich domain-containing protein 1 | 48 | CHORDC1 | | 0.78 |
| Q8IUI8 | Cytokine receptor-like factor 3 | 24 | CRLF3 | | 0.78 |
| P61962 | DDB1- and CUL4-associated factor 7 | 30 | DCAF7 | | 0.78 |
| Q8NHQ9 | ATP-dependent RNA helicase DDX55 | 36 | DDX55 | | 0.78 |
| P55010 | Eukaryotic translation initiation factor 5 | 55 | EIF5 | | 0.78 |
| A6ZKI3 | Retrotransposon Gag-like protein 8B | 19 | FAM127A; RTL8C | | 0.78 |
| P43304 | Glycerol-3-phosphate dehydrogenase, mitochondrial | 55 | GPD2 | | 0.78 |
| Q14527 | Helicase-like transcription factor | 42 | HLTF | | 0.78 |
| Q9H9A6 | Leucine-rich repeat-containing protein 40 | 28 | LRRC40 | | 0.78 |
| Q6ZRP7 | Sulfhydryl oxidase 2 | 29 | QSOX2 | | 0.78 |
| Q9H173 | Nucleotide exchange factor SIL1 | 18 | SIL1 | | 0.78 |
| Q96A57 | Transmembrane protein 230 | 31 | TMEM230 | | 0.78 |
| Q9UI30 | Multifunctional methyltransferase subunit TRM112-like protein | 33 | TRMT112 | | 0.78 |
| P68366 | Tubulin alpha-4A chain | 61 | TUBA4A | | 0.78 |
| Q9BQP7 | Mitochondrial genome maintenance exonuclease 1 | 24 | C20orf72; MGME1 | | 0.77 |
| Q13057 | Bifunctional coenzyme A synthase | 22 | COASY | | 0.77 |
| Q92979 | Ribosomal RNA small subunit methyltransferase NEP1 | 62 | EMG1 | | 0.77 |
| Q3MIP1 | Inositol 1,4,5-trisphosphate receptor-interacting protein-like 2 | 10 | ITPRIPL2 | | 0.77 |
| Q96GW9 | Methionine--tRNA ligase, mitochondrial | 31 | MARS2 | | 0.77 |
| Q86UE4 | Protein LYRIC | 51 | MTDH | | 0.77 |
| Q53EL6 | Programmed cell death protein 4 | 57 | PDCD4 | | 0.77 |
| O14737 | Programmed cell death protein 5 | 50 | PDCD5 | | 0.77 |
| Q8TCS8 | Polyribonucleotide nucleotidyltransferase 1, mitochondrial | 42 | PNPT1 | | 0.77 |
| Q7Z333 | Probable helicase senataxin | 14 | SETX | | 0.77 |
| Q13432 | Protein unc-119 homolog A | 6 | UNC119 | | 0.77 |
| Q9BRQ8 | Apoptosis-inducing factor 2 | 18 | AIFM2 | | 0.76 |
| Q86WR0 | Coiled-coil domain-containing protein 25 | 7 | CCDC25 | | 0.76 |
| P43155 | Carnitine O-acetyltransferase | 23 | CRAT | | 0.76 |
| Q9NP50 | SIN3-HDAC complex-associated factor | 20 | FAM60A; SINHCAF | | 0.76 |
| Q92805 | Golgin subfamily A member 1 | 34 | GOLGA1 | | 0.76 |
| P48163 | NADP-dependent malic enzyme | 41 | ME1 | | 0.76 |
| Q5EB52 | Mesoderm-specific transcript homolog protein | 11 | MEST | | 0.76 |
| P80297 | Metallothionein-1X | 33 | MT1X | | 0.76 |
| Q2PPJ7 | Ral GTPase-activating protein subunit alpha-2 | 19 | RALGAPA2 | | 0.76 |
| Q15758 | Neutral amino acid transporter B(0) | 34 | SLC1A5 | | 0.76 |
| Q04724 | Transducin-like enhancer protein 1 | 11 | TLE1 | | 0.76 |
| P24752 | Acetyl-CoA acetyltransferase, mitochondrial | 54 | ACAT1 | | 0.75 |
| Q6P158 | Putative ATP-dependent RNA helicase DHX57 | 20 | DHX57 | | 0.75 |
| Q03001 | Dystonin | 13 | DST | | 0.75 |
| Q08426 | Peroxisomal bifunctional enzyme | 29 | EHHADH | | 0.75 |
| Q5SZK8 | FRAS1-related extracellular matrix protein 2 | 9 | FREM2 | | 0.75 |
| Q6NVY1 | 3-hydroxyisobutyryl-CoA hydrolase, mitochondrial | 40 | HIBCH | | 0.75 |
| P10809 | 60 kDa heat shock protein, mitochondrial | 80 | HSPD1 | | 0.75 |
| Q15397 | Pumilio homolog 3 | 21 | KIAA0020; PUM3 | | 0.75 |
| Q92791 | Endoplasmic reticulum protein SC65 | 24 | LEPREL4; P3H4 | | 0.75 |
| Q4G0N4 | NAD kinase 2, mitochondrial | 40 | NADK2; NADKD1 | | 0.75 |
| Q99567 | Nuclear pore complex protein Nup88 | 39 | NUP88 | | 0.75 |
| O43929 | Origin recognition complex subunit 4 | 26 | ORC4 | | 0.75 |
| A0A1W2PR17 | 6-phosphofructo-2-kinase/fructose-2,6-bisphosphatase 3 | 20 | PFKFB3 | | 0.75 |
| D6RB92 | Proteasome assembly chaperone 4 | 23 | PSMG4 | | 0.75 |
| A1X283 | SH3 and PX domain-containing protein 2B | 11 | SH3PXD2B | | 0.75 |
| Q5M775 | Cytospin-B | 9 | SPECC1 | | 0.75 |
| Q8IYB8 | ATP-dependent RNA helicase SUPV3L1, mitochondrial | 36 | SUPV3L1 | | 0.75 |
| Q5JTV8 | Torsin-1A-interacting protein 1 | 44 | TOR1AIP1 | | 0.75 |
| F6TB26 | Tudor and KH domain-containing protein | 16 | TDRKH | | 0.75 |
| Q9BUB4 | tRNA-specific adenosine deaminase 1 | 22 | ADAT1 | | 0.74 |
| E7EVJ5 | Cytoplasmic FMR1-interacting protein | 26 | CYFIP2 | | 0.74 |
| Q9H8H2 | Probable ATP-dependent RNA helicase DDX31 | 20 | DDX31 | | 0.74 |
| Q96JC9 | ELL-associated factor 1 | 25 | EAF1 | | 0.74 |
| P61604 | 10 kDa heat shock protein, mitochondrial | 78 | HSPE1 | | 0.74 |
| P33992 | DNA replication licensing factor MCM5 | 51 | MCM5 | | 0.74 |
| Q86W50 | U6 small nuclear RNA (adenine-(43)-N(6))-methyltransferase | 22 | METTL16 | | 0.74 |
| P46199 | Translation initiation factor IF-2, mitochondrial | 28 | MTIF2 | | 0.74 |
| Q12965 | Unconventional myosin-Ie | 11 | MYO1E | | 0.74 |
| Q93015 | N-acetyltransferase 6 | 4 | NAT6 | | 0.74 |
| P61601 | Neurocalcin-delta | 30 | NCALD | | 0.74 |
| P31350 | Ribonucleoside-diphosphate reductase subunit M2 | 67 | RRM2 | | 0.74 |
| A0A0U1RQE4 | SH3 domain-containing protein 19 | 15 | SH3D19 | | 0.74 |
| O95164 | Ubiquitin-like protein 3 | 29 | UBL3 | | 0.74 |
| Q9Y5J1 | U3 small nucleolar RNA-associated protein 18 homolog | 24 | UTP18 | | 0.74 |
| A0A087X1B3 | Transmembrane protein 178B | 4 | TMEM178B | | 0.74 |
| A0A0J9YWM3 | Solute carrier family 22 member 18 | 12 | SLC22A18 | | 0.74 |
| H3BQZ6 | Synaptotagmin-17 | 9 | SYT17 | | 0.74 |
| Q9BTE6 | Alanyl-tRNA editing protein Aarsd1 | 27 | AARSD1; PTGES3L-AARSD1 | | 0.73 |
| P55265 | Double-stranded RNA-specific adenosine deaminase | 38 | ADAR | | 0.73 |
| Q7Z2E3 | Aprataxin | 27 | APTX | | 0.73 |
| Q12797 | Aspartyl/asparaginyl beta-hydroxylase | 40 | ASPH | | 0.73 |
| Q86SF2 | N-acetylgalactosaminyltransferase 7 | 55 | GALNT7 | | 0.73 |
| Q9HAV0 | Guanine nucleotide-binding protein subunit beta-4 | 17 | GNB4 | | 0.73 |
| Q8NEJ9 | Neuroguidin | 21 | NGDN | | 0.73 |
| O14802 | DNA-directed RNA polymerase III subunit RPC1 | 30 | POLR3A | | 0.73 |
| P62380 | TATA box-binding protein-like protein 1 | 16 | TBPL1 | | 0.73 |
| Q12931 | Heat shock protein 75 kDa, mitochondrial | 54 | TRAP1 | | 0.73 |
| Q7L0Y3 | tRNA methyltransferase 10 homolog C | 52 | TRMT10C | | 0.73 |
| O95900 | Mitochondrial mRNA pseudouridine synthase TRUB2 | 17 | TRUB2 | | 0.73 |
| Q8NCE0 | tRNA-splicing endonuclease subunit Sen2 | 17 | TSEN2 | | 0.73 |
| Q8IZ13 | Protein ZBED8 | 5 | C5orf54; ZBED8 | | 0.72 |
| P49736 | DNA replication licensing factor MCM2 | 47 | MCM2 | | 0.72 |
| Q9HAP2 | MLX-interacting protein | 5 | MLXIP | | 0.72 |
| Q9H1D9 | DNA-directed RNA polymerase III subunit RPC6 | 11 | POLR3F | | 0.72 |
| Q9UNP9 | Peptidyl-prolyl cis-trans isomerase E | 40 | PPIE | | 0.72 |
| Q7Z7E8 | Ubiquitin-conjugating enzyme E2 Q1 | 16 | UBE2Q1 | | 0.72 |
| P13051 | Uracil-DNA glycosylase | 16 | UNG | | 0.72 |
| G3V3R7 | Ataxin-3 (Fragment) | 22 | ATXN3 | | 0.72 |
| P35613 | Basigin | 28 | BSG | | 0.71 |
| Q9UNQ2 | Probable dimethyladenosine transferase | 29 | DIMT1 | | 0.71 |
| Q01469 | Fatty acid-binding protein 5 | 53 | FABP5 | | 0.71 |
| Q96CU9 | FAD-dependent oxidoreductase domain-containing protein 1 | 29 | FOXRED1 | | 0.71 |
| O14880 | Microsomal glutathione S-transferase 3 | 38 | MGST3 | | 0.71 |
| P43246 | DNA mismatch repair protein Msh2 | 46 | MSH2 | | 0.71 |
| E7EQY4 | Metastasis-associated protein MTA3 | 34 | MTA3 | | 0.71 |
| Q330K2 | NADH dehydrogenase (ubiquinone) complex I, assembly factor 6 | 11 | NDUFAF6 | | 0.71 |
| Q9UHV9 | Prefoldin subunit 2 | 36 | PFDN2 | | 0.71 |
| Q01813 | ATP-dependent 6-phosphofructokinase, platelet type | 45 | PFKP | | 0.71 |
| O60678 | Protein arginine N-methyltransferase 3 | 34 | PRMT3 | | 0.71 |
| Q96NY8 | Nectin-4 | 31 | PVRL4; NECTIN4 | | 0.71 |
| A0A0A0MTR2 | Prolyl 3-hydroxylase OGFOD1 | 43 | OGFOD1 | | 0.71 |
| F8VVM2 | Phosphate carrier protein, mitochondrial | 59 | SLC25A3 | | 0.71 |
| Q8WTS1 | 1-acylglycerol-3-phosphate O-acyltransferase ABHD5 | 12 | ABHD5 | | 0.7 |
| Q9NUB1 | Acetyl-coenzyme A synthetase 2-like, mitochondrial | 21 | ACSS1 | | 0.7 |
| O95433 | Activator of 90 kDa heat shock protein ATPase homolog 1 | 60 | AHSA1 | | 0.7 |
| Q9Y2Y0 | ADP-ribosylation factor-like protein 2-binding protein | 34 | ARL2BP | | 0.7 |
| Q8N5M1 | ATP synthase mitochondrial F1 complex assembly factor 2 | 24 | ATPAF2 | | 0.7 |
| Q96AQ8 | Mitochondrial calcium uniporter regulator 1 | 28 | CCDC90A; MCUR1 | | 0.7 |
| Q9NR30 | Nucleolar RNA helicase 2 | 60 | DDX21 | | 0.7 |
| Q9UBM7 | 7-dehydrocholesterol reductase | 20 | DHCR7 | | 0.7 |
| F5GXT2 | Ras GTPase-activating protein 4B | 2 | RASA4B | | 0.7 |
| F5H365 | Protein transport protein Sec23A | 34 | SEC23A | | 0.7 |
| Q96T21 | Selenocysteine insertion sequence-binding protein 2 | 14 | SECISBP2 | | 0.7 |
| Q9H5Y7 | SLIT and NTRK-like protein 6 | 23 | SLITRK6 | | 0.7 |
| P56962 | Syntaxin-17 | 20 | STX17 | | 0.7 |
| Q9BV44 | THUMP domain-containing protein 3 | 28 | THUMPD3 | | 0.7 |
| Q15785 | Mitochondrial import receptor subunit TOM34 | 67 | TOMM34 | | 0.7 |
| Q8IZ69 | tRNA (uracil-5-)-methyltransferase homolog A | 32 | TRMT2A | | 0.7 |
| D4Q8H0 | Mitogen-activated protein kinase kinase kinase MLT | 14 | ZAK; MAP3K20 | | 0.7 |
| Q92667 | A-kinase anchor protein 1, mitochondrial | 35 | AKAP1 | | 0.69 |
| Q96SZ6 | CDK5 regulatory subunit-associated protein 1 | 28 | CDK5RAP1 | | 0.69 |
| P09543 | 2',3'-cyclic-nucleotide 3'-phosphodiesterase | 40 | CNP | | 0.69 |
| Q53ET0 | CREB-regulated transcription coactivator 2 | 9 | CRTC2 | | 0.69 |
| Q14147 | Probable ATP-dependent RNA helicase DHX34 | 14 | DHX34 | | 0.69 |
| Q86X53 | Glutamate-rich protein 1 | 13 | ERICH1 | | 0.69 |
| Q9H501 | ESF1 homolog | 30 | ESF1 | | 0.69 |
| Q5HYJ3 | Protein FAM76B | 25 | FAM76B | | 0.69 |
| Q13451 | Peptidyl-prolyl cis-trans isomerase FKBP5 | 63 | FKBP5 | | 0.69 |
| Q15058 | Kinesin-like protein KIF14 | 14 | KIF14 | | 0.69 |
| P78316 | Nucleolar protein 14 | 27 | NOP14 | | 0.69 |
| Q9UBD5 | Origin recognition complex subunit 3 | 25 | ORC3 | | 0.69 |
| P08237 | ATP-dependent 6-phosphofructokinase, muscle type | 51 | PFKM | | 0.69 |
| O43172 | U4/U6 small nuclear ribonucleoprotein Prp4 | 44 | PRPF4 | | 0.69 |
| Q9Y5S9 | RNA-binding protein 8A | 32 | RBM8A; LOC101060541 | | 0.69 |
| O43159 | Ribosomal RNA-processing protein 8 | 26 | RRP8 | | 0.69 |
| Q32P41 | tRNA (guanine(37)-N1)-methyltransferase | 26 | TRMT5 | | 0.69 |
| Q15361 | Transcription termination factor 1 | 11 | TTF1 | | 0.69 |
| P62253 | Ubiquitin-conjugating enzyme E2 G1 | 16 | UBE2G1 | | 0.69 |
| Q9NRH1 | Yae1 domain-containing protein 1 | 4 | YAE1D1 | | 0.69 |
| Q7L3S4 | Zinc finger protein 771 | 25 | ZNF771 | | 0.69 |
| G3V4B8 | WD repeat-containing protein 89 (Fragment) | 5 | WDR89 | | 0.69 |
| Q9ULV4 | Coronin-1C | 37 | CORO1C | | 0.68 |
| Q9NVP1 | ATP-dependent RNA helicase DDX18 | 52 | DDX18 | | 0.68 |
| A8K855 | EF-hand calcium-binding domain-containing protein 7 | 1 | EFCAB7 | | 0.68 |
| Q9NVH0 | Exonuclease 3'-5' domain-containing protein 2 | 43 | EXD2 | | 0.68 |
| Q9Y3D6 | Mitochondrial fission 1 protein | 24 | FIS1 | | 0.68 |
| Q9Y546 | Leucine-rich repeat-containing protein 42 | 8 | LRRC42 | | 0.68 |
| P25205 | DNA replication licensing factor MCM3 | 55 | MCM3 | | 0.68 |
| Q14566 | DNA replication licensing factor MCM6 | 55 | MCM6 | | 0.68 |
| Q14676 | Mediator of DNA damage checkpoint protein 1 | 44 | MDC1 | | 0.68 |
| P55809 | Succinyl-CoA:3-ketoacid coenzyme A transferase 1, mitochondrial | 28 | OXCT1 | | 0.68 |
| Q9BUI4 | DNA-directed RNA polymerase III subunit RPC3 | 28 | POLR3C; LOC101060460 | | 0.68 |
| O75475 | PC4 and SFRS1-interacting protein | 46 | PSIP1 | | 0.68 |
| Q8WUK0 | Phosphatidylglycerophosphatase and protein-tyrosine phosphatase 1 | 39 | PTPMT1 | | 0.68 |
| Q5UIP0 | Telomere-associated protein RIF1 | 30 | RIF1 | | 0.68 |
| Q5TCZ1 | SH3 and PX domain-containing protein 2A | 10 | SH3PXD2A | | 0.68 |
| Q99720 | Sigma non-opioid intracellular receptor 1 | 15 | SIGMAR1 | | 0.68 |
| Q9HBR0 | Putative sodium-coupled neutral amino acid transporter 10 | 9 | SLC38A10 | | 0.68 |
| L0R8F8 | MIEF1 upstream open reading frame protein | 39 | SMCR7L; MIEF1 | | 0.68 |
| Q2NL82 | Pre-rRNA-processing protein TSR1 homolog | 27 | TSR1 | | 0.68 |
| Q8N1G0 | Zinc finger protein 687 | 17 | ZNF687 | | 0.68 |
| Q9Y5V0 | Zinc finger protein 706 | 39 | ZNF706 | | 0.68 |
| Q8IU85 | Calcium/calmodulin-dependent protein kinase type 1D | 15 | CAMK1D | | 0.67 |
| B0QZ18 | Copine-1 | 24 | CPNE1 | | 0.67 |
| P55060 | Exportin-2 | 47 | CSE1L | | 0.67 |
| Q9UHY8 | Fasciculation and elongation protein zeta-2 | 9 | FEZ2 | | 0.67 |
| Q8N9F7 | Lysophospholipase D GDPD1 | 44 | GDPD1 | | 0.67 |
| Q92990 | Glomulin | 13 | GLMN | | 0.67 |
| Q9Y237 | Peptidyl-prolyl cis-trans isomerase NIMA-interacting 4 | 63 | PIN4 | | 0.67 |
| P41247 | Patatin-like phospholipase domain-containing protein 4 | 35 | PNPLA4 | | 0.67 |
| Q96PU4 | E3 ubiquitin-protein ligase UHRF2 | 13 | UHRF2 | | 0.67 |
| Q99536 | Synaptic vesicle membrane protein VAT-1 homolog | 28 | VAT1 | | 0.67 |
| E7EN96 | Mediator of RNA polymerase II transcription subunit 22 (Fragment) | 20 | MED22 | | 0.67 |
| Q9NRG9 | Aladin | 25 | AAAS | | 0.66 |
| O14815 | Calpain-9 | 8 | CAPN9 | | 0.66 |
| Q9GZR7 | ATP-dependent RNA helicase DDX24 | 32 | DDX24 | | 0.66 |
| Q32P44 | Echinoderm microtubule-associated protein-like 3 | 30 | EML3 | | 0.66 |
| P10768 | S-formylglutathione hydrolase | 50 | ESD | | 0.66 |
| O15228 | Dihydroxyacetone phosphate acyltransferase | 27 | GNPAT | | 0.66 |
| O95274 | Ly6/PLAUR domain-containing protein 3 | 14 | LYPD3 | | 0.66 |
| K7EQY5 | Tyrosine-protein kinase | 4 | MATK | | 0.66 |
| P33993 | DNA replication licensing factor MCM7 | 55 | MCM7 | | 0.66 |
| P31323 | cAMP-dependent protein kinase type II-beta regulatory subunit | 31 | PRKAR2B | | 0.66 |
| Q9Y606 | tRNA pseudouridine synthase A | 52 | PUS1 | | 0.66 |
| Q9BVS5 | tRNA (adenine(58)-N(1))-methyltransferase, mitochondrial | 9 | TRMT61B | | 0.66 |
| P61758 | Prefoldin subunit 3 | 57 | VBP1 | | 0.66 |
| Q8N0U8 | Vitamin K epoxide reductase complex subunit 1-like protein 1 | 26 | VKORC1L1 | | 0.66 |
| Q96EX3 | WD repeat-containing protein 34 | 21 | WDR34 | | 0.66 |
| Q9Y2X9 | Zinc finger protein 281 | 11 | ZNF281 | | 0.66 |
| J3KMZ9 | Low-density lipoprotein receptor (Fragment) | 16 | LDLR | | 0.66 |
| Q6NXE6 | Armadillo repeat-containing protein 6 | 29 | ARMC6 | | 0.65 |
| Q8N5G0 | Small integral membrane protein 20 | 43 | C4orf52; SMIM20 | | 0.65 |
| P06493 | Cyclin-dependent kinase 1 | 67 | CDK1 | | 0.65 |
| P00374 | Dihydrofolate reductase | 33 | DHFR; DHFRP1 | | 0.65 |
| Q02127 | Dihydroorotate dehydrogenase (quinone), mitochondrial | 43 | DHODH | | 0.65 |
| P50150 | Guanine nucleotide-binding protein G(I)/G(S)/G(O) subunit gamma-4 | 21 | GNG4 | | 0.65 |
| Q14814 | Myocyte-specific enhancer factor 2D | 16 | MEF2D | | 0.65 |
| Q8N6R0 | Methyltransferase-like protein 13 | 40 | METTL13 | | 0.65 |
| Q9GZT8 | NIF3-like protein 1 | 32 | NIF3L1 | | 0.65 |
| Q86X76 | Deaminated glutathione amidase | 14 | NIT1 | | 0.65 |
| P78549 | Endonuclease III-like protein 1 | 27 | NTHL1 | | 0.65 |
| Q96E22 | Dehydrodolichyl diphosphate synthase complex subunit NUS1 | 4 | NUS1 | | 0.65 |
| C9JNP8 | Presenilins-associated rhomboid-like protein, mitochondrial | 7 | PARL | | 0.65 |
| P30154 | Serine/threonine-protein phosphatase 2A 65 kDa regulatory subunit A beta isoform | 26 | PPP2R1B | | 0.65 |
| Q04837 | Single-stranded DNA-binding protein, mitochondrial | 56 | SSBP1 | | 0.65 |
| Q96SI9 | Spermatid perinuclear RNA-binding protein | 46 | STRBP | | 0.65 |
| Q9Y2Z0 | Protein SGT1 homolog | 47 | SUGT1 | | 0.65 |
| Q96QE5 | Transcription elongation factor, mitochondrial | 19 | TEFM | | 0.65 |
| P04350 | Tubulin beta-4A chain | 57 | TUBB4A | | 0.65 |
| Q86Y07 | Serine/threonine-protein kinase VRK2 | 21 | VRK2 | | 0.65 |
| C9JRL6 | Echinoderm microtubule-associated protein-like 2 | 19 | EML2 | | 0.65 |
| H7C2K6 | Band 4.1-like protein 1 (Fragment) | 48 | EPB41L1 | | 0.65 |
| P49189 | 4-trimethylaminobutyraldehyde dehydrogenase | 44 | ALDH9A1 | | 0.64 |
| E3W994 | CLIP-associating protein 2 | 37 | CLASP2 | | 0.64 |
| Q8WXX5 | DnaJ homolog subfamily C member 9 | 56 | DNAJC9 | | 0.64 |
| Q9Y223 | Bifunctional UDP-N-acetylglucosamine 2-epimerase/N-acetylmannosamine kinase | 27 | GNE | | 0.64 |
| Q9BUP3 | Oxidoreductase HTATIP2 | 54 | HTATIP2 | | 0.64 |
| Q5SRI9 | Glycoprotein endo-alpha-1,2-mannosidase | 3 | MANEA | | 0.64 |
| Q9ULC4 | Malignant T-cell-amplified sequence 1 | 63 | MCTS1 | | 0.64 |
| Q86U44 | N6-adenosine-methyltransferase catalytic subunit | 28 | METTL3 | | 0.64 |
| Q9BV20 | Methylthioribose-1-phosphate isomerase | 30 | MRI1 | | 0.64 |
| Q15738 | Sterol-4-alpha-carboxylate 3-dehydrogenase, decarboxylating | 49 | NSDHL | | 0.64 |
| Q8WVV4 | Protein POF1B | 31 | POF1B | | 0.64 |
| O60256 | Phosphoribosyl pyrophosphate synthase-associated protein 2 | 42 | PRPSAP2 | | 0.64 |
| Q9Y467 | Sal-like protein 2 | 12 | SALL2 | | 0.64 |
| A0A0U1RRL8 | Spermatogenesis-associated protein 20 | 20 | SPATA20 | | 0.64 |
| Q02880 | DNA topoisomerase 2-beta | 37 | TOP2B | | 0.64 |
| Q8NFQ8 | Torsin-1A-interacting protein 2 | 33 | TOR1AIP2 | | 0.64 |
| Q96BY7 | Autophagy-related protein 2 homolog B | 9 | ATG2B | | 0.63 |
| Q14137 | Ribosome biogenesis protein BOP1 | 45 | BOP1 | | 0.63 |
| P78545 | ETS-related transcription factor Elf-3 | 10 | ELF3 | | 0.63 |
| Q14674 | Separin | 11 | ESPL1 | | 0.63 |
| O95163 | Elongator complex protein 1 | 33 | IKBKAP; ELP1 | | 0.63 |
| Q9NV31 | U3 small nucleolar ribonucleoprotein protein IMP3 | 38 | IMP3 | | 0.63 |
| Q9Y6Y0 | Influenza virus NS1A-binding protein | 10 | IVNS1ABP | | 0.63 |
| P33991 | DNA replication licensing factor MCM4 | 52 | MCM4 | | 0.63 |
| A6NJ78 | Probable methyltransferase-like protein 15 | 11 | METTL15 | | 0.63 |
| Q6ZNB6 | NF-X1-type zinc finger protein NFXL1 | 34 | NFXL1 | | 0.63 |
| Q9UMY1 | Nucleolar protein 7 | 27 | NOL7 | | 0.63 |
| Q9ULJ8 | Neurabin-1 | 15 | PPP1R9A | | 0.63 |
| Q96CM3 | Mitochondrial RNA pseudouridine synthase RPUSD4 | 18 | RPUSD4 | | 0.63 |
| P19623 | Spermidine synthase | 33 | SRM | | 0.63 |
| P61764 | Syntaxin-binding protein 1 | 36 | STXBP1 | | 0.63 |
| A0A087WXC0 | Synaptic functional regulator FMR1 (Fragment) | 7 | FMR1 | | 0.63 |
| X6RM59 | 5'-nucleotidase | 55 | NT5C3A | | 0.63 |
| P53365 | Arfaptin-2 | 21 | ARFIP2 | | 0.62 |
| P15291 | Beta-1,4-galactosyltransferase 1 | 29 | B4GALT1 | | 0.62 |
| Q8TDN6 | Ribosome biogenesis protein BRX1 homolog | 30 | BRIX1 | | 0.62 |
| Q9BWL3 | Uncharacterized protein C1orf43 | 21 | C1orf43 | | 0.62 |
| Q6P1S2 | Protein C3orf33 | 7 | C3orf33 | | 0.62 |
| Q7L1T6 | Cytochrome b5 reductase 4 | 8 | CYB5R4 | | 0.62 |
| Q9H2U1 | ATP-dependent RNA helicase DHX36 | 39 | DHX36 | | 0.62 |
| Q9UKN8 | General transcription factor 3C polypeptide 4 | 58 | GTF3C4 | | 0.62 |
| Q96CB9 | 5-methylcytosine rRNA methyltransferase NSUN4 | 22 | NSUN4 | | 0.62 |
| P56589 | Peroxisomal biogenesis factor 3 | 9 | PEX3 | | 0.62 |
| Q99985 | Semaphorin-3C | 14 | SEMA3C | | 0.62 |
| Q9NUJ3 | T-complex protein 11-like protein 1 | 2 | TCP11L1 | | 0.62 |
| J9JIE6 | Calcium load-activated calcium channel | 20 | TMCO1 | | 0.62 |
| O14656 | Torsin-1A | 27 | TOR1A | | 0.62 |
| Q16762 | Thiosulfate sulfurtransferase | 40 | TST | | 0.62 |
| Q4L235 | Beta-alanine-activating enzyme | 7 | AASDH | | 0.61 |
| Q9ULW3 | Activator of basal transcription 1 | 38 | ABT1 | | 0.61 |
| Q9Y6A4 | Cilia- and flagella-associated protein 20 | 25 | C16orf80; CFAP20 | | 0.61 |
| Q6P1J9 | Parafibromin | 53 | CDC73 | | 0.61 |
| O43583 | Density-regulated protein | 42 | DENR | | 0.61 |
| Q96KC8 | DnaJ homolog subfamily C member 1 | 33 | DNAJC1 | | 0.61 |
| Q15024 | Exosome complex component RRP42 | 43 | EXOSC7 | | 0.61 |
| Q05DH4 | Protein FAM160A1 | 3 | FAM160A1 | | 0.61 |
| Q9BRX5 | DNA replication complex GINS protein PSF3 | 16 | GINS3 | | 0.61 |
| Q9BRT9 | DNA replication complex GINS protein SLD5 | 28 | GINS4 | | 0.61 |
| Q92830 | Histone acetyltransferase KAT2A | 8 | KAT2A | | 0.61 |
| P49916 | DNA ligase 3 | 37 | LIG3 | | 0.61 |
| P07948 | Tyrosine-protein kinase Lyn | 11 | LYN | | 0.61 |
| I3L0E3 | HCG1984214, isoform CRA_a | 38 | MRPS17; ZNF713 | | 0.61 |
| Q96NY9 | Crossover junction endonuclease MUS81 | 13 | MUS81 | | 0.61 |
| P43490 | Nicotinamide phosphoribosyltransferase | 56 | NAMPT | | 0.61 |
| Q9BV86 | N-terminal Xaa-Pro-Lys N-methyltransferase 1 | 42 | NTMT1 | | 0.61 |
| O43913 | Origin recognition complex subunit 5 | 34 | ORC5 | | 0.61 |
| Q96SU4 | Oxysterol-binding protein-related protein 9 | 18 | OSBPL9 | | 0.61 |
| Q13393 | Phospholipase D1 | 7 | PLD1 | | 0.61 |
| P50336 | Protoporphyrinogen oxidase | 29 | PPOX | | 0.61 |
| E5RJ29 | PH and SEC7 domain-containing protein 3 | 6 | PSD3 | | 0.61 |
| O95758 | Polypyrimidine tract-binding protein 3 | 25 | PTBP3 | | 0.61 |
| Q9GZR2 | RNA exonuclease 4 | 44 | REXO4 | | 0.61 |
| O75683 | Surfeit locus protein 6 | 37 | SURF6 | | 0.61 |
| E7ETY2 | Treacle protein | 37 | TCOF1 | | 0.61 |
| F2Z2E2 | Ras GTPase-activating-like protein IQGAP3 | 14 | IQGAP3 | | 0.61 |
| F5GYA2 | Uracil-DNA glycosylase | 22 | UNG | | 0.61 |
| H7C1Z9 | Peptidylprolyl isomerase (Fragment) | 12 | FKBP14 | | 0.61 |
| D6RC36 | Deoxycytidylate deaminase (Fragment) | 34 | DCTD | | 0.61 |
| H0YLM8 | DmX-like protein 2 (Fragment) | 6 | DMXL2 | | 0.61 |
| Q68CP9 | AT-rich interactive domain-containing protein 2 | 15 | ARID2 | | 0.6 |
| Q4AC94 | C2 domain-containing protein 3 | 0 | C2CD3 | | 0.6 |
| Q9BPU6 | Dihydropyrimidinase-related protein 5 | 15 | DPYSL5 | | 0.6 |
| O75063 | Glycosaminoglycan xylosylkinase | 31 | FAM20B | | 0.6 |
| Q14691 | DNA replication complex GINS protein PSF1 | 28 | GINS1 | | 0.6 |
| Q9NZI8 | Insulin-like growth factor 2 mRNA-binding protein 1 | 45 | IGF2BP1 | | 0.6 |
| Q9BUE6 | Iron-sulfur cluster assembly 1 homolog, mitochondrial | 29 | ISCA1 | | 0.6 |
| A0A0A0MSA0 | Laminin subunit alpha-3 | 1 | LAMA3 | | 0.6 |
| P42704 | Leucine-rich PPR motif-containing protein, mitochondrial | 62 | LRPPRC | | 0.6 |
| O00592 | Podocalyxin | 18 | PODXL | | 0.6 |
| Q99643 | Succinate dehydrogenase cytochrome b560 subunit, mitochondrial | 12 | SDHC | | 0.6 |
| Q8IXU6 | Solute carrier family 35 member F2 | 12 | SLC35F2 | | 0.6 |
| Q8N5C6 | S1 RNA-binding domain-containing protein 1 | 29 | SRBD1 | | 0.6 |
| P12270 | Nucleoprotein TPR | 45 | TPR | | 0.6 |
| O75717 | WD repeat and HMG-box DNA-binding protein 1 | 37 | WDHD1 | | 0.6 |
| Q5VV50 | Zinc finger protein 691 | 8 | ZNF691 | | 0.6 |
| H0Y2S9 | Myosin phosphatase Rho-interacting protein (Fragment) | 13 | MPRIP | | 0.6 |
| J3QL56 | Protein SCO1 homolog, mitochondrial | 12 | SCO1 | | 0.6 |
| Q6UW56 | All-trans retinoic acid-induced differentiation factor | 7 | ATRAID | | 0.59 |
| Q9UK39 | Nocturnin | 12 | CCRN4L; NOCT | | 0.59 |
| A0A087WT20 | DDB1- and CUL4-associated factor 13 | 32 | DCAF13 | | 0.59 |
| Q9UNI6 | Dual specificity protein phosphatase 12 | 14 | DUSP12 | | 0.59 |
| Q9H4G0 | Band 4.1-like protein 1 | 43 | EPB41L1 | | 0.59 |
| O14893 | Gem-associated protein 2 | 27 | GEMIN2 | | 0.59 |
| Q9H3C7 | Gametogenetin-binding protein 2 | 9 | GGNBP2 | | 0.59 |
| P52758 | 2-iminobutanoate/2-iminopropanoate deaminase | 32 | HRSP12; RIDA | | 0.59 |
| O75427 | Leucine-rich repeat and calponin homology domain-containing protein 4 | 18 | LRCH4 | | 0.59 |
| P42568 | Protein AF-9 | 8 | MLLT3 | | 0.59 |
| Q9BU61 | NADH dehydrogenase [ubiquinone] 1 alpha subcomplex assembly factor 3 | 24 | NDUFAF3 | | 0.59 |
| Q96D46 | 60S ribosomal export protein NMD3 | 43 | NMD3 | | 0.59 |
| O00623 | Peroxisome assembly protein 12 | 11 | PEX12 | | 0.59 |
| O00625 | Pirin | 35 | PIR | | 0.59 |
| P30405 | Peptidyl-prolyl cis-trans isomerase F, mitochondrial | 48 | PPIF | | 0.59 |
| Q9Y3P9 | Rab GTPase-activating protein 1 | 41 | RABGAP1 | | 0.59 |
| B0QY95 | Mitochondrial dynamics protein MID51 | 14 | SMCR7L; MIEF1 | | 0.59 |
| Q86TI0 | TBC1 domain family member 1 | 7 | TBC1D1 | | 0.59 |
| O95619 | YEATS domain-containing protein 4 | 37 | YEATS4 | | 0.59 |
| Q9NRN7 | L-aminoadipate-semialdehyde dehydrogenase-phosphopantetheinyl transferase | 31 | AASDHPPT | | 0.58 |
| P14550 | Alcohol dehydrogenase [NADP(+)] | 57 | AKR1A1 | | 0.58 |
| Q6NS38 | DNA oxidative demethylase ALKBH2 | 13 | ALKBH2 | | 0.58 |
| Q8NHH9 | Atlastin-2 | 31 | ATL2 | | 0.58 |
| Q9HB07 | UPF0160 protein MYG1, mitochondrial | 29 | C12orf10 | | 0.58 |
| Q9GZT6 | Coiled-coil domain-containing protein 90B, mitochondrial | 29 | CCDC90B | | 0.58 |
| Q03701 | CCAAT/enhancer-binding protein zeta | 33 | CEBPZ | | 0.58 |
| Q92989 | Polyribonucleotide 5'-hydroxyl-kinase Clp1 | 20 | CLP1 | | 0.58 |
| Q93034 | Cullin-5 | 40 | CUL5 | | 0.58 |
| Q96GQ7 | Probable ATP-dependent RNA helicase DDX27 | 38 | DDX27 | | 0.58 |
| Q96AY2 | Crossover junction endonuclease EME1 | 12 | EME1 | | 0.58 |
| Q9NX05 | Constitutive coactivator of PPAR-gamma-like protein 2 | 24 | FAM120C | | 0.58 |
| O60282 | Kinesin heavy chain isoform 5C | 22 | KIF5C | | 0.58 |
| Q9BPZ7 | Target of rapamycin complex 2 subunit MAPKAP1 | 19 | MAPKAP1 | | 0.58 |
| Q96HR3 | Mediator of RNA polymerase II transcription subunit 30 | 19 | MED30 | | 0.58 |
| Q9BRP4 | Proteasomal ATPase-associated factor 1 | 18 | PAAF1 | | 0.58 |
| Q9GZS1 | DNA-directed RNA polymerase I subunit RPA49 | 29 | POLR1E | | 0.58 |
| P63151 | Serine/threonine-protein phosphatase 2A 55 kDa regulatory subunit B alpha isoform | 32 | PPP2R2A | | 0.58 |
| P13489 | Ribonuclease inhibitor | 58 | RNH1 | | 0.58 |
| Q9NPL8 | Complex I assembly factor TIMMDC1, mitochondrial | 31 | TIMMDC1 | | 0.58 |
| A8MUM1 | EARP-interacting protein | 21 | TSSC1; EIPR1 | | 0.58 |
| Q9NYH9 | U3 small nucleolar RNA-associated protein 6 homolog | 34 | UTP6 | | 0.58 |
| Q96DT7 | Zinc finger and BTB domain-containing protein 10 | 21 | ZBTB10 | | 0.58 |
| Q96EX1 | Small integral membrane protein 12 | 17 | C1orf212; SMIM12 | | 0.57 |
| Q9BZQ6 | ER degradation-enhancing alpha-mannosidase-like protein 3 | 10 | EDEM3 | | 0.57 |
| Q9UKD2 | mRNA turnover protein 4 homolog | 38 | MRTO4 | | 0.57 |
| Q9H0A0 | RNA cytidine acetyltransferase | 43 | NAT10 | | 0.57 |
| Q8WVJ2 | NudC domain-containing protein 2 | 25 | NUDCD2 | | 0.57 |
| A0A0D9SGE8 | PHD finger protein 6 | 35 | PHF6 | | 0.57 |
| Q9P215 | Pogo transposable element with KRAB domain | 11 | POGK | | 0.57 |
| P09661 | U2 small nuclear ribonucleoprotein A' | 47 | SNRPA1 | | 0.57 |
| P63165 | Small ubiquitin-related modifier 1 | 31 | SUMO1 | | 0.57 |
| Q9H5Q4 | Dimethyladenosine transferase 2, mitochondrial | 29 | TFB2M | | 0.57 |
| H0YI10 | Ceramide synthase 5 (Fragment) | 9 | CERS5 | | 0.57 |
| J3KP58 | CAP-Gly domain-containing linker protein 1 | 44 | CLIP1 | | 0.57 |
| C9JRP1 | Anion exchange protein (Fragment) | 16 | SLC4A7 | | 0.57 |
| O75044 | SLIT-ROBO Rho GTPase-activating protein 2 | 17 | SRGAP2 | | 0.57 |
| Q8NCW5 | NAD(P)H-hydrate epimerase | 55 | APOA1BP; NAXE | | 0.56 |
| P55957 | BH3-interacting domain death agonist | 49 | BID | | 0.56 |
| Q8WWC4 | m-AAA protease-interacting protein 1, mitochondrial | 27 | C2orf47; MAIP1 | | 0.56 |
| Q9UKF6 | Cleavage and polyadenylation specificity factor subunit 3 | 37 | CPSF3 | | 0.56 |
| Q96LJ7 | Dehydrogenase/reductase SDR family member 1 | 24 | DHRS1 | | 0.56 |
| Q9BY44 | Eukaryotic translation initiation factor 2A | 59 | EIF2A | | 0.56 |
| Q14249 | Endonuclease G, mitochondrial | 24 | ENDOG | | 0.56 |
| Q9NVN8 | Guanine nucleotide-binding protein-like 3-like protein | 34 | GNL3L | | 0.56 |
| Q8TBA6 | Golgin subfamily A member 5 | 56 | GOLGA5 | | 0.56 |
| Q96P70 | Importin-9 | 33 | IPO9 | | 0.56 |
| Q5R3B4 | Mitochondrial pyruvate carrier (Fragment) | 29 | MPC2 | | 0.56 |
| Q9Y2A7 | Nck-associated protein 1 | 36 | NCKAP1 | | 0.56 |
| O95478 | Ribosome biogenesis protein NSA2 homolog | 45 | NSA2 | | 0.56 |
| Q9H1E3 | Nuclear ubiquitous casein and cyclin-dependent kinase substrate 1 | 44 | NUCKS1 | | 0.56 |
| Q8WZA1 | Protein O-linked-mannose beta-1,2-N-acetylglucosaminyltransferase 1 | 10 | POMGNT1 | | 0.56 |
| Q15527 | Surfeit locus protein 2 | 36 | SURF2 | | 0.56 |
| Q9NUW8 | Tyrosyl-DNA phosphodiesterase 1 | 18 | TDP1 | | 0.56 |
| Q96RU2 | Ubiquitin carboxyl-terminal hydrolase 28 | 20 | USP28 | | 0.56 |
| Q9BVJ6 | U3 small nucleolar RNA-associated protein 14 homolog A | 46 | UTP14A | | 0.56 |
| Q8TBF4 | Zinc finger CCHC-type and RNA-binding motif-containing protein 1 | 28 | ZCRB1 | | 0.56 |
| E9PCX2 | Aldose reductase | 4 | AKR1B1 | | 0.56 |
| H0YF54 | von Willebrand factor A domain-containing protein 3B (Fragment) | 10 | VWA3B | | 0.56 |
| Q92688 | Acidic leucine-rich nuclear phosphoprotein 32 family member B | 31 | ANP32B | | 0.55 |
| Q8N1W1 | Rho guanine nucleotide exchange factor 28 | 9 | ARHGEF28 | | 0.55 |
| Q13535 | Serine/threonine-protein kinase ATR | 14 | ATR | | 0.55 |
| O94766 | Galactosylgalactosylxylosylprotein 3-beta-glucuronosyltransferase 3 | 35 | B3GAT3 | | 0.55 |
| P55201 | Peregrin | 12 | BRPF1 | | 0.55 |
| Q96B26 | Exosome complex component RRP43 | 24 | EXOSC8 | | 0.55 |
| Q9Y324 | rRNA-processing protein FCF1 homolog | 18 | FCF1 | | 0.55 |
| Q16595 | Frataxin, mitochondrial | 15 | FXN | | 0.55 |
| J3QR46 | Uncharacterized protein KIAA0040 | 13 | KIAA0040 | | 0.55 |
| Q6PKG0 | La-related protein 1 | 45 | LARP1 | | 0.55 |
| Q8IWT6 | Volume-regulated anion channel subunit LRRC8A | 21 | LRRC8A | | 0.55 |
| P61326 | Protein mago nashi homolog | 48 | MAGOH | | 0.55 |
| A0A0B4J1W3 | N-alpha-acetyltransferase 15, NatA auxiliary subunit | 56 | NAA15 | | 0.55 |
| A0A0B4J1S8 | Phosphatidylinositol 4-kinase beta | 13 | PI4KB | | 0.55 |
| P54727 | UV excision repair protein RAD23 homolog B | 42 | RAD23B | | 0.55 |
| Q16576 | Histone-binding protein RBBP7 | 37 | RBBP7 | | 0.55 |
| Q9BPZ2 | Spindlin-2B | 15 | SPIN2B | | 0.55 |
| Q9P2W9 | Syntaxin-18 | 35 | STX18 | | 0.55 |
| Q13769 | THO complex subunit 5 homolog | 24 | THOC5 | | 0.55 |
| Q9UJT1 | Tubulin delta chain | 2 | TUBD1 | | 0.55 |
| Q9Y4B6 | DDB1- and CUL4-associated factor 1 | 17 | VPRBP; DCAF1 | | 0.55 |
| Q9HAV4 | Exportin-5 | 37 | XPO5 | | 0.55 |
| J3QKK3 | DNA repair protein RAD51 homolog 3 | 17 | RAD51C | | 0.55 |
| A0A2R8Y657 | Equilibrative nucleoside transporter 3 | 4 | SLC29A3 | | 0.55 |
| H3BPE1 | Microtubule-actin cross-linking factor 1, isoforms 1/2/3/5 | 25 | MACF1 | | 0.55 |
| Q9NY61 | Protein AATF | 31 | AATF | | 0.54 |
| Q9NYB9 | Abl interactor 2 | 19 | ABI2 | | 0.54 |
| Q92888 | Rho guanine nucleotide exchange factor 1 | 23 | ARHGEF1 | | 0.54 |
| Q9NWY4 | Histone PARylation factor 1 | 44 | C4orf27; HPF1 | | 0.54 |
| P20042 | Eukaryotic translation initiation factor 2 subunit 2 | 64 | EIF2S2 | | 0.54 |
| P41091 | Eukaryotic translation initiation factor 2 subunit 3 | 51 | EIF2S3 | | 0.54 |
| Q5VY60 | HAUS augmin-like complex subunit 6 | 8 | HAUS6 | | 0.54 |
| P38646 | Stress-70 protein, mitochondrial | 59 | HSPA9 | | 0.54 |
| Q9UNF1 | Melanoma-associated antigen D2 | 55 | MAGED2 | | 0.54 |
| A0A087X2D5 | 39S ribosomal protein L45, mitochondrial | 41 | MRPL45 | | 0.54 |
| P82933 | 28S ribosomal protein S9, mitochondrial | 62 | MRPS9 | | 0.54 |
| Q9BVI4 | Nucleolar complex protein 4 homolog | 36 | NOC4L | | 0.54 |
| Q13416 | Origin recognition complex subunit 2 | 20 | ORC2 | | 0.54 |
| P16885 | 1-phosphatidylinositol 4,5-bisphosphate phosphodiesterase gamma-2 | 3 | PLCG2 | | 0.54 |
| Q9NQC3 | Reticulon-4 | 19 | RTN4 | | 0.54 |
| O15198 | Mothers against decapentaplegic homolog 9 | 12 | SMAD9 | | 0.54 |
| P08579 | U2 small nuclear ribonucleoprotein B'' | 35 | SNRPB2 | | 0.54 |
| Q99426 | Tubulin-folding cofactor B | 41 | TBCB | | 0.54 |
| Q9H3H1 | tRNA dimethylallyltransferase | 7 | TRIT1 | | 0.54 |
| A0A087X0M4 | Kanadaptin | 46 | SLC4A1AP | | 0.54 |
| Q53H12 | Acylglycerol kinase, mitochondrial | 41 | AGK | | 0.53 |
| Q8WXE1 | ATR-interacting protein | 6 | ATRIP | | 0.53 |
| Q8NCM8 | Cytoplasmic dynein 2 heavy chain 1 | 1 | DYNC2H1 | | 0.53 |
| P05198 | Eukaryotic translation initiation factor 2 subunit 1 | 73 | EIF2S1 | | 0.53 |
| Q9NQT4 | Exosome complex component RRP46 | 12 | EXOSC5 | | 0.53 |
| P39748 | Flap endonuclease 1 | 54 | FEN1 | | 0.53 |
| Q969P0 | Immunoglobulin superfamily member 8 | 20 | IGSF8 | | 0.53 |
| P00338 | L-lactate dehydrogenase A chain | 55 | LDHA | | 0.53 |
| P62310 | U6 snRNA-associated Sm-like protein LSm3 | 12 | LSM3 | | 0.53 |
| Q8IVS2 | Malonyl-CoA-acyl carrier protein transacylase, mitochondrial | 46 | MCAT | | 0.53 |
| Q9H204 | Mediator of RNA polymerase II transcription subunit 28 | 20 | MED28 | | 0.53 |
| P49959 | Double-strand break repair protein MRE11 | 36 | MRE11A; MRE11 | | 0.53 |
| Q8NCE2 | Myotubularin-related protein 14 | 17 | MTMR14 | | 0.53 |
| Q32Q12 | Nucleoside diphosphate kinase | 74 | NME1-NME2 | | 0.53 |
| Q96RS6 | NudC domain-containing protein 1 | 38 | NUDCD1 | | 0.53 |
| P35658 | Nuclear pore complex protein Nup214 | 31 | NUP214 | | 0.53 |
| Q8IUC4 | Rhophilin-2 | 29 | RHPN2 | | 0.53 |
| Q8WVM8 | Sec1 family domain-containing protein 1 | 46 | SCFD1 | | 0.53 |
| Q8N9G1 | Protein transport protein Sec16A | 36 | SEC16A | | 0.53 |
| Q9BTV4 | Transmembrane protein 43 | 45 | TMEM43 | | 0.53 |
| O43156 | TELO2-interacting protein 1 homolog | 17 | TTI1 | | 0.53 |
| Q13426 | DNA repair protein XRCC4 | 32 | XRCC4 | | 0.53 |
| A0A1B0GTJ7 | Adenylosuccinate lyase | 36 | ADSL | | 0.53 |
| F8VXJ2 | Homeobox protein DLX-1 (Fragment) | 11 | DLX1 | | 0.53 |
| O43150 | Arf-GAP with SH3 domain, ANK repeat and PH domain-containing protein 2 | 19 | ASAP2 | | 0.52 |
| Q15059 | Bromodomain-containing protein 3 | 36 | BRD3 | | 0.52 |
| A0A087X0N3 | Nucleolar protein 4-like | 17 | C20orf112; NOL4L | | 0.52 |
| Q9NZ63 | Telomere length and silencing protein 1 homolog | 31 | C9orf78 | | 0.52 |
| Q9C0F1 | Centrosomal protein of 44 kDa | 23 | CEP44 | | 0.52 |
| P51398 | 28S ribosomal protein S29, mitochondrial | 40 | DAP3 | | 0.52 |
| Q9Y6V7 | Probable ATP-dependent RNA helicase DDX49 | 28 | DDX49 | | 0.52 |
| Q96HY7 | Probable 2-oxoglutarate dehydrogenase E1 component DHKTD1, mitochondrial | 28 | DHTKD1 | | 0.52 |
| Q96G46 | tRNA-dihydrouridine(47) synthase [NAD(P)(+)]-like | 12 | DUS3L | | 0.52 |
| Q99848 | Probable rRNA-processing protein EBP2 | 44 | EBNA1BP2 | | 0.52 |
| Q13823 | Nucleolar GTP-binding protein 2 | 24 | GNL2 | | 0.52 |
| Q969Y2 | tRNA modification GTPase GTPBP3, mitochondrial | 15 | GTPBP3 | | 0.52 |
| Q68CZ6 | HAUS augmin-like complex subunit 3 | 12 | HAUS3 | | 0.52 |
| Q53H82 | Endoribonuclease LACTB2 | 53 | LACTB2 | | 0.52 |
| A0A087X0N2 | Leptin receptor gene-related protein | 16 | LEPROT | | 0.52 |
| Q9NVX2 | Notchless protein homolog 1 | 35 | NLE1 | | 0.52 |
| Q5SWA1 | Protein phosphatase 1 regulatory subunit 15B | 5 | PPP1R15B | | 0.52 |
| P20339 | Ras-related protein Rab-5A | 60 | RAB5A | | 0.52 |
| O75792 | Ribonuclease H2 subunit A | 21 | RNASEH2A | | 0.52 |
| Q96HI0 | Sentrin-specific protease 5 | 5 | SENP5 | | 0.52 |
| Q5K4L6 | Long-chain fatty acid transport protein 3 | 11 | SLC27A3 | | 0.52 |
| Q658P3 | Metalloreductase STEAP3 | 6 | STEAP3 | | 0.52 |
| P57088 | Transmembrane protein 33 | 29 | TMEM33 | | 0.52 |
| Q9BUF5 | Tubulin beta-6 chain | 41 | TUBB6 | | 0.52 |
| Q96RL7 | Vacuolar protein sorting-associated protein 13A | 8 | VPS13A | | 0.52 |
| A0A2R8Y761 | Ribonuclease H2 subunit B | 31 | RNASEH2B | | 0.52 |
| H3BSM7 | RUS1 family protein C16orf58 | 29 | C16orf58 | | 0.52 |
| H7C5V3 | 28S ribosomal protein S28, mitochondrial (Fragment) | 28 | MRPS28 | | 0.52 |
| A0A087X165 | SRC kinase-signaling inhibitor 1 | 19 | SRCIN1 | | 0.52 |
| Q86UL3 | Glycerol-3-phosphate acyltransferase 4 | 25 | AGPAT6; GPAT4 | | 0.51 |
| P00568 | Adenylate kinase isoenzyme 1 | 38 | AK1 | | 0.51 |
| E9PG40 | Amyloid-beta A4 protein | 17 | APP | | 0.51 |
| P30622 | CAP-Gly domain-containing linker protein 1 | 41 | CLIP1 | | 0.51 |
| P23786 | Carnitine O-palmitoyltransferase 2, mitochondrial | 40 | CPT2 | | 0.51 |
| Q9BQ39 | ATP-dependent RNA helicase DDX50 | 33 | DDX50 | | 0.51 |
| Q5JVZ5 | Engulfment and cell motility protein 2 | 19 | ELMO2 | | 0.51 |
| Q9NQT5 | Exosome complex component RRP40 | 35 | EXOSC3 | | 0.51 |
| Q0VDF9 | Heat shock 70 kDa protein 14 | 24 | HSPA14 | | 0.51 |
| P02545 | Prelamin-A/C | 66 | LMNA | | 0.51 |
| O15525 | Transcription factor MafG | 38 | MAFG | | 0.51 |
| Q9NWT1 | p21-activated protein kinase-interacting protein 1 | 42 | PAK1IP1 | | 0.51 |
| P61457 | Pterin-4-alpha-carbinolamine dehydratase | 64 | PCBD1 | | 0.51 |
| O15212 | Prefoldin subunit 6 | 46 | PFDN6 | | 0.51 |
| Q9Y256 | CAAX prenyl protease 2 | 10 | RCE1; C11orf80 | | 0.51 |
| Q9NWX6 | Probable tRNA(His) guanylyltransferase | 27 | THG1L | | 0.51 |
| O75152 | Zinc finger CCCH domain-containing protein 11A | 41 | ZC3H11A | | 0.51 |
| Q6P6B7 | Ankyrin repeat domain-containing protein 16 | 9 | ANKRD16 | | 0.5 |
| Q8N8R7 | ARL14 effector protein | 14 | ARL14EP | | 0.5 |
| P36404 | ADP-ribosylation factor-like protein 2 | 39 | ARL2 | | 0.5 |
| Q8N4T8 | Carbonyl reductase family member 4 | 43 | CBR4 | | 0.5 |
| O14735 | CDP-diacylglycerol--inositol 3-phosphatidyltransferase | 32 | CDIPT | | 0.5 |
| Q92564 | DCN1-like protein 4 | 16 | DCUN1D4 | | 0.5 |
| A0A1W2PQ51 | Probable ATP-dependent RNA helicase DDX17 | 53 | DDX17 | | 0.5 |
| Q9Y2R4 | Probable ATP-dependent RNA helicase DDX52 | 20 | DDX52 | | 0.5 |
| Q8NCA5 | Protein FAM98A | 24 | FAM98A | | 0.5 |
| Q3T8J9 | GON-4-like protein | 4 | GON4L | | 0.5 |
| Q96GA3 | Protein LTV1 homolog | 16 | LTV1 | | 0.5 |
| Q9Y399 | 28S ribosomal protein S2, mitochondrial | 33 | MRPS2 | | 0.5 |
| O75489 | NADH dehydrogenase [ubiquinone] iron-sulfur protein 3, mitochondrial | 51 | NDUFS3 | | 0.5 |
| Q86UY8 | 5'-nucleotidase domain-containing protein 3 | 21 | NT5DC3 | | 0.5 |
| Q13153 | Serine/threonine-protein kinase PAK 1 | 43 | PAK1 | | 0.5 |
| Q99471 | Prefoldin subunit 5 | 32 | PFDN5 | | 0.5 |
| Q9H9Y6 | DNA-directed RNA polymerase I subunit RPA2 | 17 | POLR1B | | 0.5 |
| Q15050 | Ribosome biogenesis regulatory protein homolog | 43 | RRS1 | | 0.5 |
| Q96T23 | Remodeling and spacing factor 1 | 32 | RSF1 | | 0.5 |
| O14828 | Secretory carrier-associated membrane protein 3 | 46 | SCAMP3 | | 0.5 |
| Q08945 | FACT complex subunit SSRP1 | 48 | SSRP1 | | 0.5 |
| Q9Y5B9 | FACT complex subunit SPT16 | 42 | SUPT16H | | 0.5 |
| Q8TEL6 | Short transient receptor potential channel 4-associated protein | 11 | TRPC4AP | | 0.5 |
| Q969E8 | Pre-rRNA-processing protein TSR2 homolog | 8 | TSR2 | | 0.5 |
| Q9NRR5 | Ubiquilin-4 | 35 | UBQLN4 | | 0.5 |
| Q9NW82 | WD repeat-containing protein 70 | 21 | WDR70 | | 0.5 |
| Q86TW2 | Uncharacterized aarF domain-containing protein kinase 1 | 10 | ADCK1 | | 0.49 |
| P27695 | DNA-(apurinic or apyrimidinic site) lyase | 64 | APEX1 | | 0.49 |
| O15013 | Rho guanine nucleotide exchange factor 10 | 10 | ARHGEF10 | | 0.49 |
| O15446 | DNA-directed RNA polymerase I subunit RPA34 | 51 | CD3EAP | | 0.49 |
| C9JZR2 | Catenin delta-1 | 45 | CTNND1 | | 0.49 |
| Q9NY93 | Probable ATP-dependent RNA helicase DDX56 | 32 | DDX56 | | 0.49 |
| A6NML8 | Diaphanous homolog 2 (Drosophila), isoform CRA_c | 12 | DIAPH2 | | 0.49 |
| Q8TF46 | DIS3-like exonuclease 1 | 5 | DIS3L | | 0.49 |
| Q53GS7 | Nucleoporin GLE1 | 22 | GLE1 | | 0.49 |
| Q5TH69 | Brefeldin A-inhibited guanine nucleotide-exchange protein 3 | 32 | KIAA1244; ARFGEF3 | | 0.49 |
| Q9C0E8 | Endoplasmic reticulum junction formation protein lunapark | 39 | KIAA1715; LNPK | | 0.49 |
| Q7Z7F7 | 39S ribosomal protein L55, mitochondrial | 30 | MRPL55 | | 0.49 |
| Q9H6R4 | Nucleolar protein 6 | 24 | NOL6 | | 0.49 |
| Q9H2H8 | Peptidyl-prolyl cis-trans isomerase-like 3 | 39 | PPIL3 | | 0.49 |
| P26045 | Tyrosine-protein phosphatase non-receptor type 3 | 14 | PTPN3 | | 0.49 |
| Q9NXS2 | Glutaminyl-peptide cyclotransferase-like protein | 5 | QPCTL | | 0.49 |
| O76021 | Ribosomal L1 domain-containing protein 1 | 44 | RSL1D1 | | 0.49 |
| Q9UBY0 | Sodium/hydrogen exchanger 2 | 5 | SLC9A2 | | 0.49 |
| Q9UH65 | Switch-associated protein 70 | 44 | SWAP70 | | 0.49 |
| Q9NVG8 | TBC1 domain family member 13 | 36 | TBC1D13 | | 0.49 |
| Q6NUQ4 | Transmembrane protein 214 | 30 | TMEM214 | | 0.49 |
| O00635 | E3 ubiquitin-protein ligase TRIM38 | 4 | TRIM38 | | 0.49 |
| Q5VYS8 | Terminal uridylyltransferase 7 | 13 | ZCCHC6 | | 0.49 |
| Q15072 | Zinc finger protein OZF | 37 | ZNF146 | | 0.49 |
| S4R3K3 | Tubulin epsilon chain | 9 | TUBE1 | | 0.49 |
| F6TLX2 | Glyoxalase domain-containing protein 4 | 28 | GLOD4 | | 0.49 |
| I3L397 | Eukaryotic translation initiation factor 5A (Fragment) | 56 | EIF5A | | 0.49 |
| E7EX70 | DNA-directed RNA polymerase I subunit RPA49 | 35 | POLR1E | | 0.49 |
| Q8N961 | Ankyrin repeat and BTB/POZ domain-containing protein 2 | 3 | ABTB2 | | 0.48 |
| P51649 | Succinate-semialdehyde dehydrogenase, mitochondrial | 36 | ALDH5A1 | | 0.48 |
| Q96ER9 | Coiled-coil domain-containing protein 51 | 25 | CCDC51 | | 0.48 |
| Q9Y6N1 | Cytochrome c oxidase assembly protein COX11, mitochondrial | 13 | COX11 | | 0.48 |
| P41162 | ETS translocation variant 3 | 8 | ETV3 | | 0.48 |
| Q53R41 | FAST kinase domain-containing protein 1, mitochondrial | 8 | FASTKD1 | | 0.48 |
| P08263 | Glutathione S-transferase A1 | 13 | GSTA1 | | 0.48 |
| Q9NU22 | Midasin | 27 | MDN1 | | 0.48 |
| C9JJ19 | 28S ribosomal protein S34, mitochondrial | 64 | MRPS34 | | 0.48 |
| P82673 | 28S ribosomal protein S35, mitochondrial | 49 | MRPS35 | | 0.48 |
| Q9NVV4 | Poly(A) RNA polymerase, mitochondrial | 25 | MTPAP | | 0.48 |
| P41227 | N-alpha-acetyltransferase 10 | 60 | NAA10 | | 0.48 |
| O60361 | Putative nucleoside diphosphate kinase | 66 | NME2P1 | | 0.48 |
| P12004 | Proliferating cell nuclear antigen | 65 | PCNA | | 0.48 |
| Q9Y520 | Protein PRRC2C | 30 | PRRC2C | | 0.48 |
| Q9H6T3 | RNA polymerase II-associated protein 3 | 53 | RPAP3 | | 0.48 |
| F8WC89 | SAC3 domain-containing protein 1 | 26 | SAC3D1 | | 0.48 |
| Q9Y3A5 | Ribosome maturation protein SBDS | 52 | SBDS | | 0.48 |
| P31641 | Sodium- and chloride-dependent taurine transporter | 7 | SLC6A6 | | 0.48 |
| G3V1K2 | Ribitol-5-phosphate xylosyltransferase 1 | 30 | TMEM5 | | 0.48 |
| P10155 | 60 kDa SS-A/Ro ribonucleoprotein | 45 | TROVE2 | | 0.48 |
| Q9H0D6 | 5'-3' exoribonuclease 2 | 44 | XRN2 | | 0.48 |
| Q8N2K0 | Monoacylglycerol lipase ABHD12 | 27 | ABHD12 | | 0.47 |
| Q9NPH0 | Lysophosphatidic acid phosphatase type 6 | 13 | ACP6; LOC101060704 | | 0.47 |
| Q9UHR4 | Brain-specific angiogenesis inhibitor 1-associated protein 2-like protein 1 | 41 | BAIAP2L1 | | 0.47 |
| Q9HAS0 | Protein Njmu-R1 | 15 | C17orf75 | | 0.47 |
| Q9BW04 | Specifically androgen-regulated gene protein | 4 | C1orf116 | | 0.47 |
| Q9BUV8 | Uncharacterized protein C20orf24 | 17 | C20orf24 | | 0.47 |
| Q9P031 | Thyroid transcription factor 1-associated protein 26 | 37 | CCDC59 | | 0.47 |
| O14646 | Chromodomain-helicase-DNA-binding protein 1 | 17 | CHD1 | | 0.47 |
| Q9NYJ1 | Cytochrome c oxidase assembly factor 4 homolog, mitochondrial | 26 | COA4 | | 0.47 |
| Q9BZJ0 | Crooked neck-like protein 1 | 35 | CRNKL1 | | 0.47 |
| Q8WVC6 | Dephospho-CoA kinase domain-containing protein | 26 | DCAKD | | 0.47 |
| J3QL63 | Golgi apparatus membrane protein TVP23 homolog | 18 | FAM18B1; TVP23B | | 0.47 |
| Q86YR5 | G-protein-signaling modulator 1 | 3 | GPSM1 | | 0.47 |
| O00479 | High mobility group nucleosome-binding domain-containing protein 4 | 27 | HMGN4 | | 0.47 |
| Q92845 | Kinesin-associated protein 3 | 7 | KIFAP3 | | 0.47 |
| O00255 | Menin | 10 | MEN1 | | 0.47 |
| P22033 | Methylmalonyl-CoA mutase, mitochondrial | 34 | MUT | | 0.47 |
| Q9Y3C1 | Nucleolar protein 16 | 62 | NOP16 | | 0.47 |
| P10588 | Nuclear receptor subfamily 2 group F member 6 | 14 | NR2F6 | | 0.47 |
| Q8NFH4 | Nucleoporin Nup37 | 22 | NUP37 | | 0.47 |
| P08559 | Pyruvate dehydrogenase E1 component subunit alpha, somatic form, mitochondrial | 37 | PDHA1 | | 0.47 |
| Q96L92 | Sorting nexin-27 | 28 | SNX27 | | 0.47 |
| O43609 | Protein sprouty homolog 1 | 9 | SPRY1 | | 0.47 |
| Q8NI27 | THO complex subunit 2 | 29 | THOC2 | | 0.47 |
| Q9Y584 | Mitochondrial import inner membrane translocase subunit Tim22 | 8 | TIMM22 | | 0.47 |
| E5RIH5 | TELO2-interacting protein 2 | 27 | TTI2 | | 0.47 |
| Q3ZCM7 | Tubulin beta-8 chain | 24 | TUBB8 | | 0.47 |
| Q712K3 | Ubiquitin-conjugating enzyme E2 R2 | 24 | UBE2R2 | | 0.47 |
| O43709 | Probable 18S rRNA (guanine-N(7))-methyltransferase | 29 | WBSCR22; BUD23 | | 0.47 |
| Q8TF74 | WAS/WASL-interacting protein family member 2 | 39 | WIPF2 | | 0.47 |
| D6RFL2 | LYR motif-containing protein 9 | 21 | LYRM9 | | 0.47 |
| C9JLU1 | DNA-directed RNA polymerases I, II, and III subunit RPABC3 (Fragment) | 39 | POLR2H | | 0.47 |
| H0Y714 | U3 small nucleolar ribonucleoprotein protein IMP4 (Fragment) | 24 | IMP4 | | 0.47 |
| Q9UJX3 | Anaphase-promoting complex subunit 7 | 31 | ANAPC7 | | 0.46 |
| Q9Y6H1 | Coiled-coil-helix-coiled-coil-helix domain-containing protein 2 | 38 | CHCHD2 | | 0.46 |
| Q96I36 | Cytochrome c oxidase assembly protein COX14 | 14 | COX14 | | 0.46 |
| Q9UPY3 | Endoribonuclease Dicer | 19 | DICER1 | | 0.46 |
| Q9GZU8 | Protein FAM192A | 40 | FAM192A | | 0.46 |
| Q9HCN4 | GPN-loop GTPase 1 | 15 | GPN1 | | 0.46 |
| P82909 | 28S ribosomal protein S36, mitochondrial | 53 | MRPS36 | | 0.46 |
| Q9H4Z3 | Phosphorylated CTD-interacting factor 1 | 21 | PCIF1 | | 0.46 |
| P14859 | POU domain, class 2, transcription factor 1 | 6 | POU2F1 | | 0.46 |
| Q06203 | Amidophosphoribosyltransferase | 45 | PPAT | | 0.46 |
| Q9HBD1 | Roquin-2 | 15 | RC3H2 | | 0.46 |
| Q9Y3B4 | Splicing factor 3B subunit 6 | 34 | SF3B14; SF3B6 | | 0.46 |
| Q6P4A7 | Sideroflexin-4 | 20 | SFXN4 | | 0.46 |
| Q96FV9 | THO complex subunit 1 | 52 | THOC1 | | 0.46 |
| Q2T9J0 | Peroxisomal leader peptide-processing protease | 27 | TYSND1 | | 0.46 |
| Q8IWA0 | WD repeat-containing protein 75 | 32 | WDR75 | | 0.46 |
| P25490 | Transcriptional repressor protein YY1 | 33 | YY1 | | 0.46 |
| A0A0A0MTB8 | WD repeat-containing protein 36 | 31 | WDR36 | | 0.46 |
| A0A286YFF8 | Protein MON2 homolog | 20 | MON2 | | 0.46 |
| F8W8D3 | Histone RNA hairpin-binding protein | 27 | SLBP | | 0.46 |
| O00193 | Small acidic protein | 26 | C11orf58 | | 0.45 |
| Q13185 | Chromobox protein homolog 3 | 62 | CBX3; C15orf57; CCDC32 | | 0.45 |
| Q2TBE0 | CWF19-like protein 2 | 15 | CWF19L2 | | 0.45 |
| Q96HP0 | Dedicator of cytokinesis protein 6 | 8 | DOCK6 | | 0.45 |
| P41567 | Eukaryotic translation initiation factor 1 | 60 | EIF1 | | 0.45 |
| Q9BQ52 | Zinc phosphodiesterase ELAC protein 2 | 33 | ELAC2 | | 0.45 |
| Q8WUU5 | GATA zinc finger domain-containing protein 1 | 27 | GATAD1 | | 0.45 |
| Q9BSH5 | Haloacid dehalogenase-like hydrolase domain-containing protein 3 | 41 | HDHD3 | | 0.45 |
| Q15751 | Probable E3 ubiquitin-protein ligase HERC1 | 6 | HERC1 | | 0.45 |
| O15347 | High mobility group protein B3 | 40 | HMGB3 | | 0.45 |
| Q6DN90 | IQ motif and SEC7 domain-containing protein 1 | 10 | IQSEC1 | | 0.45 |
| P57682 | Krueppel-like factor 3 | 5 | KLF3 | | 0.45 |
| Q8IVH4 | Methylmalonic aciduria type A protein, mitochondrial | 8 | MMAA | | 0.45 |
| Q6IA69 | Glutamine-dependent NAD(+) synthetase | 16 | NADSYN1 | | 0.45 |
| Q9HC98 | Serine/threonine-protein kinase Nek6 | 22 | NEK6 | | 0.45 |
| Q5C9Z4 | Nucleolar MIF4G domain-containing protein 1 | 15 | NOM1 | | 0.45 |
| O43660 | Pleiotropic regulator 1 | 48 | PLRG1 | | 0.45 |
| Q9NRY6 | Phospholipid scramblase 3 | 9 | PLSCR3 | | 0.45 |
| Q7Z3K3 | Pogo transposable element with ZNF domain | 17 | POGZ | | 0.45 |
| Q15054 | DNA polymerase delta subunit 3 | 25 | POLD3 | | 0.45 |
| Q6R327 | Rapamycin-insensitive companion of mTOR | 13 | RICTOR | | 0.45 |
| Q93073 | Selenocysteine insertion sequence-binding protein 2-like | 7 | SECISBP2L | | 0.45 |
| Q9NTG7 | NAD-dependent protein deacetylase sirtuin-3, mitochondrial | 8 | SIRT3 | | 0.45 |
| Q9HC21 | Mitochondrial thiamine pyrophosphate carrier | 34 | SLC25A19 | | 0.45 |
| Q13428 | Treacle protein | 37 | TCOF1 | | 0.45 |
| Q9NQZ2 | Something about silencing protein 10 | 16 | UTP3 | | 0.45 |
| B9EG95 | ZNF682 protein | 3 | ZNF682 | | 0.45 |
| A0A087WZT0 | Protein Smaug homolog 2 | 11 | SAMD4B | | 0.45 |
| K7EQB6 | DNA ligase 3 (Fragment) | 59 | LIG3 | | 0.45 |
| O43707 | Alpha-actinin-4 | 67 | ACTN4 | | -0.45 |
| Q7Z3B0 | Small integral membrane protein 15 | 9 | C5orf43; SMIM15 | | -0.45 |
| P07384 | Calpain-1 catalytic subunit | 57 | CAPN1 | | -0.45 |
| P42892 | Endothelin-converting enzyme 1 | 24 | ECE1 | | -0.45 |
| A0A0C4DGV9 | DNA ligase | 3 | LIG4 | | -0.45 |
| Q6P1M3 | Lethal(2) giant larvae protein homolog 2 | 37 | LLGL2 | | -0.45 |
| P35579 | Myosin-9 | 60 | MYH9 | | -0.45 |
| O94832 | Unconventional myosin-Id | 39 | MYO1D | | -0.45 |
| P42356 | Phosphatidylinositol 4-kinase alpha | 22 | PI4KA | | -0.45 |
| Q86XN7 | Proline and serine-rich protein 1 | 2 | PROSER1 | | -0.45 |
| Q6VN20 | Ran-binding protein 10 | 25 | RANBP10 | | -0.45 |
| O00442 | RNA 3'-terminal phosphate cyclase | 31 | RTCA | | -0.45 |
| P31431 | Syndecan-4 | 34 | SDC4 | | -0.45 |
| O43255 | E3 ubiquitin-protein ligase SIAH2 | 10 | SIAH2 | | -0.45 |
| Q07889 | Son of sevenless homolog 1 | 14 | SOS1 | | -0.45 |
| Q9NP84 | Tumor necrosis factor receptor superfamily member 12A | 29 | TNFRSF12A | | -0.45 |
| Q5T4S7 | E3 ubiquitin-protein ligase UBR4 | 30 | UBR4 | | -0.45 |
| H0YAC6 | Lipopolysaccharide-responsive and beige-like anchor protein (Fragment) | 43 | LRBA | | -0.45 |
| A0A2R8Y4Z8 | Coiled-coil domain-containing protein 9 | 29 | CCDC9 | | -0.45 |
| A0A0A0MTH9 | TATA-binding protein-associated factor 172 | 26 | BTAF1 | | -0.45 |
| A0A087WZF1 | Lipoma-preferred partner | 34 | LPP | | -0.45 |
| Q9NRK6 | ATP-binding cassette sub-family B member 10, mitochondrial | 12 | ABCB10 | | -0.46 |
| Q9Y2G3 | Probable phospholipid-transporting ATPase IF | 11 | ATP11B | | -0.46 |
| Q99622 | Protein C10 | 46 | C12orf57 | | -0.46 |
| Q8N129 | Protein canopy homolog 4 | 21 | CNPY4 | | -0.46 |
| P23919 | Thymidylate kinase | 55 | DTYMK | | -0.46 |
| Q9UBC2 | Epidermal growth factor receptor substrate 15-like 1 | 49 | EPS15L1 | | -0.46 |
| P08754 | Guanine nucleotide-binding protein G(k) subunit alpha | 36 | GNAI3 | | -0.46 |
| O75367 | Core histone macro-H2A.1 | 48 | H2AFY | | -0.46 |
| Q5SSJ5 | Heterochromatin protein 1-binding protein 3 | 40 | HP1BP3 | | -0.46 |
| P54652 | Heat shock-related 70 kDa protein 2 | 26 | HSPA2 | | -0.46 |
| Q6VY07 | Phosphofurin acidic cluster sorting protein 1 | 26 | PACS1 | | -0.46 |
| Q86UA1 | Pre-mRNA-processing factor 39 | 19 | PRPF39 | | -0.46 |
| Q9H0U4 | Ras-related protein Rab-1B | 65 | RAB1B | | -0.46 |
| Q9UNH7 | Sorting nexin-6 | 38 | SNX6 | | -0.46 |
| Q13188 | Serine/threonine-protein kinase 3 | 47 | STK3 | | -0.46 |
| O75410 | Transforming acidic coiled-coil-containing protein 1 | 35 | TACC1 | | -0.46 |
| Q8TF30 | WASP homolog-associated protein with actin, membranes and microtubules | 4 | WHAMM | | -0.46 |
| P31749 | RAC-alpha serine/threonine-protein kinase | 41 | AKT1 | | -0.47 |
| Q96CW1 | AP-2 complex subunit mu | 53 | AP2M1 | | -0.47 |
| Q8NFW8 | N-acylneuraminate cytidylyltransferase | 39 | CMAS | | -0.47 |
| P21291 | Cysteine and glycine-rich protein 1 | 50 | CSRP1 | | -0.47 |
| P50570 | Dynamin-2 | 51 | DNM2 | | -0.47 |
| P13804 | Electron transfer flavoprotein subunit alpha, mitochondrial | 57 | ETFA | | -0.47 |
| P22830 | Ferrochelatase, mitochondrial | 59 | FECH | | -0.47 |
| Q9Y5Z4 | Heme-binding protein 2 | 37 | HEBP2 | | -0.47 |
| P46940 | Ras GTPase-activating-like protein IQGAP1 | 56 | IQGAP1 | | -0.47 |
| P08648 | Integrin alpha-5 | 2 | ITGA5 | | -0.47 |
| Q6P9B6 | TLD domain-containing protein 1 | 24 | KIAA1609; TLDC1 | | -0.47 |
| Q03252 | Lamin-B2 | 55 | LMNB2 | | -0.47 |
| Q7L1W4 | Volume-regulated anion channel subunit LRRC8D | 4 | LRRC8D | | -0.47 |
| Q96P16 | Regulation of nuclear pre-mRNA domain-containing protein 1A | 34 | RPRD1A | | -0.47 |
| Q92844 | TRAF family member-associated NF-kappa-B activator | 15 | TANK | | -0.47 |
| Q8N9U0 | Tandem C2 domains nuclear protein | 44 | TC2N | | -0.47 |
| Q8IWX7 | Protein unc-45 homolog B | 2 | UNC45B | | -0.47 |
| Q13107 | Ubiquitin carboxyl-terminal hydrolase 4 | 7 | USP4 | | -0.47 |
| E9PN48 | ADP-ribosylation factor GTPase-activating protein 2 (Fragment) | 16 | ARFGAP2 | | -0.47 |
| E5RGR0 | Acyl-protein thioesterase 1 (Fragment) | 30 | LYPLA1 | | -0.47 |
| A0A1B0GTG2 | Alpha-aminoadipic semialdehyde dehydrogenase | 48 | ALDH7A1 | | -0.47 |
| O75843 | AP-1 complex subunit gamma-like 2 | 17 | AP1G2 | | -0.48 |
| Q5T9A4 | ATPase family AAA domain-containing protein 3B | 39 | ATAD3B | | -0.48 |
| O95865 | N(G),N(G)-dimethylarginine dimethylaminohydrolase 2 | 34 | DDAH2 | | -0.48 |
| P53701 | Cytochrome c-type heme lyase | 47 | HCCS | | -0.48 |
| D6RAR4 | Hepatocyte growth factor activator | 4 | HGFAC | | -0.48 |
| Q9NWT6 | Hypoxia-inducible factor 1-alpha inhibitor | 29 | HIF1AN | | -0.48 |
| P26440 | Isovaleryl-CoA dehydrogenase, mitochondrial | 22 | IVD | | -0.48 |
| O43318 | Mitogen-activated protein kinase kinase kinase 7 | 31 | MAP3K7 | | -0.48 |
| Q9ULH7 | MKL/myocardin-like protein 2 | 24 | MKL2 | | -0.48 |
| Q9C0I1 | Myotubularin-related protein 12 | 28 | MTMR12 | | -0.48 |
| C9JEG4 | Myosin regulatory light chain 2, atrial isoform | 7 | MYL7 | | -0.48 |
| F5GZ78 | Paxillin | 28 | PXN | | -0.48 |
| Q96C24 | Synaptotagmin-like protein 4 | 5 | SYTL4 | | -0.48 |
| H7BY36 | RNA-binding protein EWS (Fragment) | 27 | EWSR1 | | -0.48 |
| H3BPS8 | Fructose-bisphosphate aldolase A (Fragment) | 65 | ALDOA | | -0.48 |
| F8W6C2 | SPATS2-like protein (Fragment) | 59 | SPATS2L | | -0.48 |
| Q2M2I8 | AP2-associated protein kinase 1 | 18 | AAK1 | | -0.49 |
| P35219 | Carbonic anhydrase-related protein | 42 | CA8 | | -0.49 |
| P41240 | Tyrosine-protein kinase CSK | 46 | CSK | | -0.49 |
| P04899 | Guanine nucleotide-binding protein G(i) subunit alpha-2 | 36 | GNAI2 | | -0.49 |
| Q9P2K6 | Kelch-like protein 42 | 7 | KLHDC5; KLHL42 | | -0.49 |
| P53801 | Pituitary tumor-transforming gene 1 protein-interacting protein | 18 | PTTG1IP | | -0.49 |
| O76062 | Delta(14)-sterol reductase | 9 | TM7SF2 | | -0.49 |
| Q7Z403 | Transmembrane channel-like protein 6 | 7 | TMC6 | | -0.49 |
| Q9NQ34 | Transmembrane protein 9B | 12 | TMEM9B | | -0.49 |
| Q9C037 | E3 ubiquitin-protein ligase TRIM4 | 24 | TRIM4 | | -0.49 |
| P22314 | Ubiquitin-like modifier-activating enzyme 1 | 57 | UBA1 | | -0.49 |
| P62068 | Ubiquitin carboxyl-terminal hydrolase 46 | 17 | USP46 | | -0.49 |
| A0A096LPI6 | Uncharacterized protein (Fragment) | 33 | N/A | | -0.49 |
| H0Y547 | Phospholipid-transporting ATPase (Fragment) | 9 | ATP11A | | -0.49 |
| A0A0A0MSB8 | Exocyst complex component 7 | 37 | EXOC7 | | -0.49 |
| O60503 | Adenylate cyclase type 9 | 1 | ADCY9 | | -0.5 |
| P17655 | Calpain-2 catalytic subunit | 43 | CAPN2 | | -0.5 |
| Q9H6E4 | Coiled-coil domain-containing protein 134 | 23 | CCDC134 | | -0.5 |
| Q9BVM2 | Protein DPCD | 28 | DPCD | | -0.5 |
| Q8IYI6 | Exocyst complex component 8 | 45 | EXOC8 | | -0.5 |
| P11413 | Glucose-6-phosphate 1-dehydrogenase | 78 | G6PD | | -0.5 |
| Q9UJJ9 | N-acetylglucosamine-1-phosphotransferase subunit gamma | 18 | GNPTG | | -0.5 |
| Q7LGA3 | Heparan sulfate 2-O-sulfotransferase 1 | 21 | HS2ST1 | | -0.5 |
| P20700 | Lamin-B1 | 71 | LMNB1 | | -0.5 |
| Q9ULV0 | Unconventional myosin-Vb | 13 | MYO5B | | -0.5 |
| Q9HAB8 | Phosphopantothenate--cysteine ligase | 32 | PPCS | | -0.5 |
| Q9P2B2 | Prostaglandin F2 receptor negative regulator | 23 | PTGFRN | | -0.5 |
| Q06124 | Tyrosine-protein phosphatase non-receptor type 11 | 59 | PTPN11 | | -0.5 |
| Q969Q5 | Ras-related protein Rab-24 | 33 | RAB24 | | -0.5 |
| Q92543 | Sorting nexin-19 | 3 | SNX19 | | -0.5 |
| P14373 | Zinc finger protein RFP | 30 | TRIM27 | | -0.5 |
| Q9BZV1 | UBX domain-containing protein 6 | 16 | UBXN6 | | -0.5 |
| Q96JC1 | Vam6/Vps39-like protein | 30 | VPS39 | | -0.5 |
| Q96AJ9 | Vesicle transport through interaction with t-SNAREs homolog 1A | 26 | VTI1A | | -0.5 |
| H3BRF9 | Abscission/NoCut checkpoint regulator | 31 | ZFYVE19 | | -0.5 |
| H0Y9Z7 | Kinesin-like protein KIF13A (Fragment) | 7 | KIF13A | | -0.5 |
| A0A087WUX8 | MICOS complex subunit | 30 | APOOL | | -0.5 |
| A0A087WZG4 | Rho guanine nucleotide exchange factor 18 (Fragment) | 11 | ARHGEF18 | | -0.5 |
| P52594 | Arf-GAP domain and FG repeat-containing protein 1 | 21 | AGFG1 | | -0.51 |
| Q9UH17 | DNA dC->dU-editing enzyme APOBEC-3B | 22 | APOBEC3B | | -0.51 |
| Q13867 | Bleomycin hydrolase | 42 | BLMH | | -0.51 |
| Q9NZT1 | Calmodulin-like protein 5 | 66 | CALML5 | | -0.51 |
| O60826 | Coiled-coil domain-containing protein 22 | 37 | CCDC22 | | -0.51 |
| Q8N465 | D-2-hydroxyglutarate dehydrogenase, mitochondrial | 11 | D2HGDH | | -0.51 |
| Q96C19 | EF-hand domain-containing protein D2 | 39 | EFHD2 | | -0.51 |
| Q8N8S7 | Protein enabled homolog | 30 | ENAH | | -0.51 |
| E9PJX4 | FYVE, RhoGEF and PH domain-containing protein 4 | 12 | FGD4 | | -0.51 |
| Q9NXN4 | Ganglioside-induced differentiation-associated protein 2 | 27 | GDAP2 | | -0.51 |
| O15230 | Laminin subunit alpha-5 | 15 | LAMA5 | | -0.51 |
| P50851 | Lipopolysaccharide-responsive and beige-like anchor protein | 38 | LRBA | | -0.51 |
| Q08174 | Protocadherin-1 | 13 | PCDH1 | | -0.51 |
| P16435 | NADPH--cytochrome P450 reductase | 56 | POR | | -0.51 |
| Q06323 | Proteasome activator complex subunit 1 | 67 | PSME1 | | -0.51 |
| Q86YS3 | Rab11 family-interacting protein 4 | 9 | RAB11FIP4 | | -0.51 |
| Q3YEC7 | Rab-like protein 6 | 35 | RABL6 | | -0.51 |
| Q9UBS8 | E3 ubiquitin-protein ligase RNF14 | 23 | RNF14 | | -0.51 |
| Q07890 | Son of sevenless homolog 2 | 6 | SOS2 | | -0.51 |
| Q5T5C0 | Syntaxin-binding protein 5 | 2 | STXBP5 | | -0.51 |
| P0C1Z6 | TCF3 fusion partner | 13 | TFPT | | -0.51 |
| Q9HD45 | Transmembrane 9 superfamily member 3 | 17 | TM9SF3 | | -0.51 |
| P51580 | Thiopurine S-methyltransferase | 28 | TPMT | | -0.51 |
| Q6EMK4 | Vasorin | 15 | VASN | | -0.51 |
| Q9NSU2 | Three-prime repair exonuclease 1 | 20 | TREX1 | | -0.51 |
| J3QTA6 | MICOS complex subunit | 28 | CHCHD6 | | -0.51 |
| O95573 | Long-chain-fatty-acid--CoA ligase 3 | 50 | ACSL3 | | -0.52 |
| Q5T0Z8 | Uncharacterized protein C6orf132 | 24 | C6orf132 | | -0.52 |
| O14936 | Peripheral plasma membrane protein CASK | 37 | CASK | | -0.52 |
| Q9UEE9 | Craniofacial development protein 1 | 40 | CFDP1 | | -0.52 |
| Q8NE62 | Choline dehydrogenase, mitochondrial | 30 | CHDH | | -0.52 |
| Q9BT09 | Protein canopy homolog 3 | 30 | CNPY3 | | -0.52 |
| Q5HYK3 | 2-methoxy-6-polyprenyl-1,4-benzoquinol methylase, mitochondrial | 19 | COQ5 | | -0.52 |
| O43310 | CBP80/20-dependent translation initiation factor | 6 | CTIF | | -0.52 |
| Q9BU89 | Deoxyhypusine hydroxylase | 42 | DOHH | | -0.52 |
| P07954 | Fumarate hydratase, mitochondrial | 45 | FH | | -0.52 |
| Q02790 | Peptidyl-prolyl cis-trans isomerase FKBP4 | 66 | FKBP4 | | -0.52 |
| P48735 | Isocitrate dehydrogenase [NADP], mitochondrial | 55 | IDH2 | | -0.52 |
| Q9UIC8 | Leucine carboxyl methyltransferase 1 | 31 | LCMT1 | | -0.52 |
| K7ELL7 | Glucosidase 2 subunit beta | 53 | PRKCSH | | -0.52 |
| Q6NUJ5 | PWWP domain-containing protein 2B | 10 | PWWP2B | | -0.52 |
| Q9P2K3 | REST corepressor 3 | 31 | RCOR3 | | -0.52 |
| Q7L099 | Protein RUFY3 | 11 | RUFY3 | | -0.52 |
| Q9HD40 | O-phosphoseryl-tRNA(Sec) selenium transferase | 8 | SEPSECS | | -0.52 |
| Q08AF3 | Schlafen family member 5 | 12 | SLFN5 | | -0.52 |
| O43581 | Synaptotagmin-7 | 16 | SYT7 | | -0.52 |
| Q5T3F8 | CSC1-like protein 2 | 8 | TMEM63B | | -0.52 |
| D3DQ30 | HCG40295, isoform CRA_d | 35 | TTC39A | | -0.52 |
| Q17R98 | Zinc finger protein 827 | 3 | ZNF827 | | -0.52 |
| H0Y2Y8 | Zyxin (Fragment) | 33 | ZYX | | -0.52 |
| A6NN50 | Obscurin-like protein 1 | 10 | OBSL1 | | -0.52 |
| P35573 | Glycogen debranching enzyme | 26 | AGL | | -0.53 |
| Q6RW13 | Type-1 angiotensin II receptor-associated protein | 14 | AGTRAP | | -0.53 |
| Q9Y2V2 | Calcium-regulated heat-stable protein 1 | 24 | CARHSP1 | | -0.53 |
| Q16543 | Hsp90 co-chaperone Cdc37 | 40 | CDC37 | | -0.53 |
| O75503 | Ceroid-lipofuscinosis neuronal protein 5 | 11 | CLN5 | | -0.53 |
| O43934 | UNC93-like protein MFSD11 | 2 | MFSD11 | | -0.53 |
| B4DHE8 | cDNA FLJ56904, highly similar to RNA-binding protein Musashi homolog 2 | 35 | MSI2 | | -0.53 |
| O00221 | NF-kappa-B inhibitor epsilon | 6 | NFKBIE | | -0.53 |
| Q9NX40 | OCIA domain-containing protein 1 | 31 | OCIAD1 | | -0.53 |
| Q9H999 | Pantothenate kinase 3 | 15 | PANK3 | | -0.53 |
| Q8WUM4 | Programmed cell death 6-interacting protein | 56 | PDCD6IP | | -0.53 |
| P98179 | RNA-binding protein 3 | 24 | RBM3 | | -0.53 |
| Q9H9B4 | Sideroflexin-1 | 55 | SFXN1 | | -0.53 |
| Q5VSL9 | Striatin-interacting protein 1 | 26 | STRIP1 | | -0.53 |
| B5MCD7 | cDNA FLJ52856, highly similar to Synaptogyrin-1 | 14 | SYNGR1 | | -0.53 |
| Q66K14 | TBC1 domain family member 9B | 24 | TBC1D9B | | -0.53 |
| Q9NYU2 | UDP-glucose:glycoprotein glucosyltransferase 1 | 36 | UGGT1 | | -0.53 |
| A0A087X1Z3 | Proteasome activator complex subunit 2 | 54 | PSME2 | | -0.53 |
| A0A075B712 | T cell receptor alpha joining 54 (Fragment) | 35 | TRAJ54 | | -0.53 |
| J3QKU3 | Epithelial-splicing regulatory protein 2 (Fragment) | 49 | ESRP2 | | -0.53 |
| Q66GS9 | Centrosomal protein of 135 kDa | 3 | CEP135 | | -0.54 |
| Q9Y259 | Choline/ethanolamine kinase | 3 | CHKB | | -0.54 |
| O43281 | Embryonal Fyn-associated substrate | 22 | EFS | | -0.54 |
| Q92817 | Envoplakin | 39 | EVPL | | -0.54 |
| Q13439 | Golgin subfamily A member 4 | 46 | GOLGA4 | | -0.54 |
| Q9H9P8 | L-2-hydroxyglutarate dehydrogenase, mitochondrial | 32 | L2HGDH | | -0.54 |
| Q9BTT6 | Leucine-rich repeat-containing protein 1 | 30 | LRRC1 | | -0.54 |
| Q13724 | Mannosyl-oligosaccharide glucosidase | 24 | MOGS | | -0.54 |
| Q9UM47 | Neurogenic locus notch homolog protein 3 | 9 | NOTCH3 | | -0.54 |
| O75864 | Protein phosphatase 1 regulatory subunit 37 | 25 | PPP1R37 | | -0.54 |
| Q8TB72 | Pumilio homolog 2 | 19 | PUM2 | | -0.54 |
| Q13425 | Beta-2-syntrophin | 31 | SNTB2 | | -0.54 |
| A0A1W2PRA1 | Stromal interaction molecule 2 | 5 | STIM2 | | -0.54 |
| Q9BXJ8 | Transmembrane protein 120A | 3 | TMEM120A | | -0.54 |
| O75382 | Tripartite motif-containing protein 3 | 32 | TRIM3 | | -0.54 |
| Q9UPN9 | E3 ubiquitin-protein ligase TRIM33 | 22 | TRIM33 | | -0.54 |
| Q70CQ3 | Ubiquitin carboxyl-terminal hydrolase 30 | 15 | USP30 | | -0.54 |
| Q96AX1 | Vacuolar protein sorting-associated protein 33A | 16 | VPS33A | | -0.54 |
| Q8IZQ1 | WD repeat and FYVE domain-containing protein 3 | 2 | WDFY3 | | -0.54 |
| A0A087WXS7 | ATPase ASNA1 | 24 | ASNA1 | | -0.54 |
| Q6PD74 | Alpha- and gamma-adaptin-binding protein p34 | 23 | AAGAB | | -0.55 |
| Q96B36 | Proline-rich AKT1 substrate 1 | 16 | AKT1S1 | | -0.55 |
| Q9ULJ7 | Ankyrin repeat domain-containing protein 50 | 14 | ANKRD50 | | -0.55 |
| O95782 | AP-2 complex subunit alpha-1 | 50 | AP2A1 | | -0.55 |
| Q68EM7 | Rho GTPase-activating protein 17 | 26 | ARHGAP17 | | -0.55 |
| Q9BXL6 | Caspase recruitment domain-containing protein 14 | 7 | CARD14 | | -0.55 |
| Q00536 | Cyclin-dependent kinase 16 | 39 | CDK16 | | -0.55 |
| Q9ULM6 | CCR4-NOT transcription complex subunit 6 | 5 | CNOT6 | | -0.55 |
| D6RBW1 | Eukaryotic translation initiation factor 4E | 29 | EIF4E | | -0.55 |
| O94919 | Endonuclease domain-containing 1 protein | 24 | ENDOD1 | | -0.55 |
| Q6ZV73 | FYVE, RhoGEF and PH domain-containing protein 6 | 3 | FGD6 | | -0.55 |
| Q96RQ3 | Methylcrotonoyl-CoA carboxylase subunit alpha, mitochondrial | 35 | MCCC1 | | -0.55 |
| P13533 | Myosin-6 | 1 | MYH6 | | -0.55 |
| Q8N3E9 | 1-phosphatidylinositol 4,5-bisphosphate phosphodiesterase delta-3 | 5 | PLCD3 | | -0.55 |
| Q9HB21 | Pleckstrin homology domain-containing family A member 1 | 14 | PLEKHA1 | | -0.55 |
| P29590 | Protein PML | 10 | PML | | -0.55 |
| Q8WUF5 | RelA-associated inhibitor | 34 | PPP1R13L | | -0.55 |
| Q66LE6 | Serine/threonine-protein phosphatase 2A 55 kDa regulatory subunit B delta isoform | 19 | PPP2R2D | | -0.55 |
| Q587I9 | Vesicle transport protein SFT2C | 19 | SFT2D3 | | -0.55 |
| Q8NBJ9 | SID1 transmembrane family member 2 | 7 | SIDT2 | | -0.55 |
| Q8N370 | Large neutral amino acids transporter small subunit 4 | 7 | SLC43A2 | | -0.55 |
| P35270 | Sepiapterin reductase | 54 | SPR | | -0.55 |
| Q9HCD6 | Protein TANC2 | 14 | TANC2 | | -0.55 |
| Q9BZM5 | UL16-binding protein 2 | 30 | ULBP2 | | -0.55 |
| Q9H269 | Vacuolar protein sorting-associated protein 16 homolog | 19 | VPS16 | | -0.55 |
| O75083 | WD repeat-containing protein 1 | 42 | WDR1 | | -0.55 |
| A6NCS6 | Uncharacterized protein C2orf72 | 21 | C2orf72 | | -0.56 |
| O43852 | Calumenin | 61 | CALU | | -0.56 |
| Q13561 | Dynactin subunit 2 | 64 | DCTN2 | | -0.56 |
| Q9Y5P6 | Mannose-1-phosphate guanyltransferase beta | 30 | GMPPB | | -0.56 |
| A1L0T0 | Acetolactate synthase-like protein | 39 | ILVBL | | -0.56 |
| Q9P0J7 | E3 ubiquitin-protein ligase KCMF1 | 19 | KCMF1 | | -0.56 |
| Q02083 | N-acylethanolamine-hydrolyzing acid amidase | 12 | NAAA | | -0.56 |
| Q5T2D3 | OTU domain-containing protein 3 | 13 | OTUD3 | | -0.56 |
| Q92613 | Protein Jade-3 | 7 | PHF16; JADE3 | | -0.56 |
| Q9BQE4 | Selenoprotein S | 35 | VIMP; SELENOS | | -0.56 |
| Q9P253 | Vacuolar protein sorting-associated protein 18 homolog | 19 | VPS18 | | -0.56 |
| O75319 | RNA/RNP complex-1-interacting phosphatase | 10 | DUSP11 | | -0.56 |
| Q86XL3 | Ankyrin repeat and LEM domain-containing protein 2 | 41 | ANKLE2 | | -0.57 |
| P10398 | Serine/threonine-protein kinase A-Raf | 38 | ARAF | | -0.57 |
| P21281 | V-type proton ATPase subunit B, brain isoform | 37 | ATP6V1B2 | | -0.57 |
| P00387 | NADH-cytochrome b5 reductase 3 | 50 | CYB5R3 | | -0.57 |
| P21709 | Ephrin type-A receptor 1 | 9 | EPHA1 | | -0.57 |
| Q9Y2D4 | Exocyst complex component 6B | 17 | EXOC6B | | -0.57 |
| O95684 | FGFR1 oncogene partner | 28 | FGFR1OP | | -0.57 |
| Q4V328 | GRIP1-associated protein 1 | 51 | GRIPAP1 | | -0.57 |
| Q29836 | HLA class I histocompatibility antigen, B-67 alpha chain | 27 | HLA-B | | -0.57 |
| Q9H1H9 | Kinesin-like protein KIF13A | 7 | KIF13A | | -0.57 |
| Q14703 | Membrane-bound transcription factor site-1 protease | 10 | MBTPS1 | | -0.57 |
| Q14696 | LRP chaperone MESD | 44 | MESDC2; MESD | | -0.57 |
| Q9NR12 | PDZ and LIM domain protein 7 | 28 | PDLIM7 | | -0.57 |
| Q8IWE5 | Pleckstrin homology domain-containing family M member 2 | 4 | PLEKHM2 | | -0.57 |
| A9X3U0 | BSK65-TEST2 | 14 | RNF185 | | -0.57 |
| Q969K3 | E3 ubiquitin-protein ligase RNF34 | 11 | RNF34 | | -0.57 |
| Q96T51 | RUN and FYVE domain-containing protein 1 | 26 | RUFY1 | | -0.57 |
| Q8WV41 | Sorting nexin-33 | 6 | SNX33 | | -0.57 |
| P00441 | Superoxide dismutase [Cu-Zn] | 45 | SOD1 | | -0.57 |
| Q8IWV7 | E3 ubiquitin-protein ligase UBR1 | 21 | UBR1 | | -0.57 |
| A0A2R8YG42 | Rho guanine nucleotide exchange factor 7 | 20 | ARHGEF7 | | -0.57 |
| E7EQB2 | Lactotransferrin (Fragment) | 3 | LTF | | -0.57 |
| H7BZG6 | AP complex subunit sigma (Fragment) | 31 | AP1S2 | | -0.57 |
| O15438 | Canalicular multispecific organic anion transporter 2 | 10 | ABCC3 | | -0.58 |
| P24666 | Low molecular weight phosphotyrosine protein phosphatase | 66 | ACP1 | | -0.58 |
| P51826 | AF4/FMR2 family member 3 | 3 | AFF3 | | -0.58 |
| Q2TAA5 | GDP-Man:Man(3)GlcNAc(2)-PP-Dol alpha-1,2-mannosyltransferase | 20 | ALG11 | | -0.58 |
| Q6QHC5 | Sphingolipid delta(4)-desaturase/C4-monooxygenase DES2 | 4 | DEGS2 | | -0.58 |
| Q92538 | Golgi-specific brefeldin A-resistance guanine nucleotide exchange factor 1 | 29 | GBF1 | | -0.58 |
| Q96IJ6 | Mannose-1-phosphate guanyltransferase alpha | 37 | GMPPA | | -0.58 |
| Q13325 | Interferon-induced protein with tetratricopeptide repeats 5 | 15 | IFIT5 | | -0.58 |
| Q14653 | Interferon regulatory factor 3 | 17 | IRF3 | | -0.58 |
| Q9UNW1 | Multiple inositol polyphosphate phosphatase 1 | 21 | MINPP1 | | -0.58 |
| Q7L9L4 | MOB kinase activator 1B | 29 | MOB1B | | -0.58 |
| Q96QR8 | Transcriptional activator protein Pur-beta | 34 | PURB | | -0.58 |
| Q13464 | Rho-associated protein kinase 1 | 38 | ROCK1 | | -0.58 |
| H0YKT5 | Transducin-like enhancer protein 3 | 19 | TLE3 | | -0.58 |
| Q9Y2K1 | Zinc finger and BTB domain-containing protein 1 | 4 | ZBTB1 | | -0.58 |
| O95365 | Zinc finger and BTB domain-containing protein 7A | 22 | ZBTB7A | | -0.58 |
| A0A1W2PS43 | Lysosome membrane protein 2 | 23 | SCARB2 | | -0.58 |
| C9JJV6 | Myeloid-associated differentiation marker (Fragment) | 23 | MYADM | | -0.58 |
| Q9H3P7 | Golgi resident protein GCP60 | 39 | ACBD3 | | -0.59 |
| A0A0J9YWL0 | Beta/gamma crystallin domain-containing protein 1 | 32 | AIM1; CRYBG1 | | -0.59 |
| P04424 | Argininosuccinate lyase | 28 | ASL | | -0.59 |
| Q8WXE0 | Caskin-2 | 26 | CASKIN2 | | -0.59 |
| Q8IZD4 | mRNA-decapping enzyme 1B | 21 | DCP1B | | -0.59 |
| O94760 | N(G),N(G)-dimethylarginine dimethylaminohydrolase 1 | 31 | DDAH1 | | -0.59 |
| Q8TEK3 | Histone-lysine N-methyltransferase, H3 lysine-79 specific | 1 | DOT1L | | -0.59 |
| P30084 | Enoyl-CoA hydratase, mitochondrial | 42 | ECHS1 | | -0.59 |
| Q10469 | Alpha-1,6-mannosyl-glycoprotein 2-beta-N-acetylglucosaminyltransferase | 19 | MGAT2 | | -0.59 |
| P35240 | Merlin | 18 | NF2 | | -0.59 |
| C9JYY6 | Neuronal cell adhesion molecule | 15 | NRCAM | | -0.59 |
| G3V148 | RING finger protein 121 | 5 | RNF121 | | -0.59 |
| Q9Y6Y8 | SEC23-interacting protein | 30 | SEC23IP | | -0.59 |
| Q9H936 | Mitochondrial glutamate carrier 1 | 37 | SLC25A22 | | -0.59 |
| Q9H2G2 | STE20-like serine/threonine-protein kinase | 43 | SLK | | -0.59 |
| Q9NQ86 | E3 ubiquitin-protein ligase TRIM36 | 13 | TRIM36 | | -0.59 |
| Q709C8 | Vacuolar protein sorting-associated protein 13C | 28 | VPS13C | | -0.59 |
| A0A1B0GW68 | Acid ceramidase | 29 | ASAH1 | | -0.59 |
| F8W9X7 | Coiled-coil domain-containing protein 93 | 28 | CCDC93 | | -0.59 |
| P61163 | Alpha-centractin | 40 | ACTR1A | | -0.6 |
| Q9NW15 | Anoctamin-10 | 16 | ANO10 | | -0.6 |
| P21283 | V-type proton ATPase subunit C 1 | 64 | ATP6V1C1 | | -0.6 |
| Q9NYQ6 | Cadherin EGF LAG seven-pass G-type receptor 1 | 2 | CELSR1 | | -0.6 |
| Q12907 | Vesicular integral-membrane protein VIP36 | 40 | LMAN2 | | -0.6 |
| Q96A59 | MARVEL domain-containing protein 3 | 20 | MARVELD3 | | -0.6 |
| O95396 | Adenylyltransferase and sulfurtransferase MOCS3 | 40 | MOCS3 | | -0.6 |
| P18440 | Arylamine N-acetyltransferase 1 | 23 | NAT1 | | -0.6 |
| O15530 | 3-phosphoinositide-dependent protein kinase 1 | 37 | PDPK1 | | -0.6 |
| Q9BU68 | Proline-rich protein 15-like protein | 49 | PRR15L | | -0.6 |
| Q8N1S5 | Zinc transporter ZIP11 | 20 | SLC39A11 | | -0.6 |
| Q96B96 | Promethin | 13 | TMEM159 | | -0.6 |
| Q4KMQ1 | Taperin | 15 | TPRN | | -0.6 |
| Q8N3P4 | Vacuolar protein sorting-associated protein 8 homolog | 14 | VPS8 | | -0.6 |
| P52907 | F-actin-capping protein subunit alpha-1 | 65 | CAPZA1 | | -0.61 |
| P53675 | Clathrin heavy chain 2 | 11 | CLTCL1 | | -0.61 |
| Q9BR76 | Coronin-1B | 27 | CORO1B | | -0.61 |
| X6RCK5 | Dynactin subunit 3 (Fragment) | 26 | DCTN3 | | -0.61 |
| Q9H223 | EH domain-containing protein 4 | 46 | EHD4 | | -0.61 |
| P54753 | Ephrin type-B receptor 3 | 22 | EPHB3 | | -0.61 |
| X6RLX0 | ELKS/Rab6-interacting/CAST family member 1 | 34 | ERC1 | | -0.61 |
| Q9BRX8 | Redox-regulatory protein FAM213A | 43 | FAM213A | | -0.61 |
| Q6KB66 | Keratin, type II cytoskeletal 80 | 14 | KRT80 | | -0.61 |
| P50579 | Methionine aminopeptidase 2 | 46 | METAP2 | | -0.61 |
| P42785 | Lysosomal Pro-X carboxypeptidase | 8 | PRCP | | -0.61 |
| Q9UJ41 | Rab5 GDP/GTP exchange factor | 27 | RABGEF1 | | -0.61 |
| Q6NUM9 | All-trans-retinol 13,14-reductase | 30 | RETSAT | | -0.61 |
| O75695 | Protein XRP2 | 33 | RP2 | | -0.61 |
| Q9HB40 | Retinoid-inducible serine carboxypeptidase | 9 | SCPEP1 | | -0.61 |
| Q9BV40 | Vesicle-associated membrane protein 8 | 39 | VAMP8 | | -0.61 |
| Q9Y4E6 | WD repeat-containing protein 7 | 7 | WDR7 | | -0.61 |
| F8WE88 | Unconventional myosin-Va | 12 | MYO5A | | -0.61 |
| P36405 | ADP-ribosylation factor-like protein 3 | 39 | ARL3 | | -0.62 |
| P0DN79 | Cystathionine beta-synthase-like protein | 9 | CBS; LOC102724560; CBSL | | -0.62 |
| Q96JQ2 | Calmin | 18 | CLMN | | -0.62 |
| Q9BSJ8 | Extended synaptotagmin-1 | 39 | ESYT1 | | -0.62 |
| O00519 | Fatty-acid amide hydrolase 1 | 29 | FAAH | | -0.62 |
| Q6P587 | Acylpyruvase FAHD1, mitochondrial | 57 | FAHD1 | | -0.62 |
| Q14435 | Polypeptide N-acetylgalactosaminyltransferase 3 | 36 | GALNT3 | | -0.62 |
| P15586 | N-acetylglucosamine-6-sulfatase | 17 | GNS | | -0.62 |
| P14735 | Insulin-degrading enzyme | 42 | IDE | | -0.62 |
| Q01546 | Keratin, type II cytoskeletal 2 oral | 11 | KRT76 | | -0.62 |
| Q5T3J3 | Ligand-dependent nuclear receptor-interacting factor 1 | 8 | LRIF1 | | -0.62 |
| O60476 | Mannosyl-oligosaccharide 1,2-alpha-mannosidase IB | 10 | MAN1A2 | | -0.62 |
| Q9BV36 | Melanophilin | 39 | MLPH | | -0.62 |
| O95631 | Netrin-1 | 7 | NTN1 | | -0.62 |
| Q969U7 | Proteasome assembly chaperone 2 | 22 | PSMG2 | | -0.62 |
| Q5EBL4 | RILP-like protein 1 | 22 | RILPL1 | | -0.62 |
| Q8NEW0 | Zinc transporter 7 | 12 | SLC30A7 | | -0.62 |
| Q13596 | Sorting nexin-1 | 44 | SNX1 | | -0.62 |
| Q9BVV7 | Mitochondrial import inner membrane translocase subunit Tim21 | 25 | TIMM21 | | -0.62 |
| O14773 | Tripeptidyl-peptidase 1 | 7 | TPP1 | | -0.62 |
| Q9H3M7 | Thioredoxin-interacting protein | 27 | TXNIP; LOC101060503 | | -0.62 |
| M0QY01 | Epidermal growth factor receptor substrate 15-like 1 (Fragment) | 17 | EPS15L1 | | -0.62 |
| Q9Y4K4 | Mitogen-activated protein kinase kinase kinase kinase 5 | 16 | MAP4K5 | | -0.62 |
| H3BUN4 | Nucleolar protein 3 (Fragment) | 57 | NOL3 | | -0.62 |
| H0YI09 | Methyltransferase-like protein 7A (Fragment) | 38 | METTL7A | | -0.62 |
| O75882 | Attractin | 6 | ATRN | | -0.63 |
| P15056 | Serine/threonine-protein kinase B-raf | 18 | BRAF | | -0.63 |
| Q6B0J5 | HFE protein | 3 | HFE | | -0.63 |
| Q86X29 | Lipolysis-stimulated lipoprotein receptor | 26 | LSR | | -0.63 |
| Q7L5Y9 | Macrophage erythroblast attacher | 24 | MAEA | | -0.63 |
| Q05513 | Protein kinase C zeta type | 13 | PRKCZ | | -0.63 |
| Q13308 | Inactive tyrosine-protein kinase 7 | 33 | PTK7 | | -0.63 |
| O00194 | Ras-related protein Rab-27B | 54 | RAB27B | | -0.63 |
| P20336 | Ras-related protein Rab-3A | 44 | RAB3A | | -0.63 |
| Q8IZ41 | Ras and EF-hand domain-containing protein | 6 | RASEF | | -0.63 |
| O95487 | Protein transport protein Sec24B | 21 | SEC24B | | -0.63 |
| K7ERC8 | 3-ketodihydrosphingosine reductase | 23 | KDSR | | -0.63 |
| F6RP06 | BCL2/adenovirus E1B 19 kDa protein-interacting protein 3 (Fragment) | 11 | BNIP3 | | -0.63 |
| Q6IQ32 | Activity-dependent neuroprotector homeobox protein 2 | 5 | ADNP2 | | -0.64 |
| Q15904 | V-type proton ATPase subunit S1 | 26 | ATP6AP1 | | -0.64 |
| Q5SWX3 | Calcium/calmodulin-dependent protein kinase (CaM kinase) II gamma, isoform CRA_n | 28 | CAMK2G | | -0.64 |
| Q9UHQ9 | NADH-cytochrome b5 reductase 1 | 42 | CYB5R1 | | -0.64 |
| Q9H6A0 | DENN domain-containing protein 2D | 20 | DENND2D | | -0.64 |
| G3V180 | Dipeptidyl peptidase 3 | 55 | DPP3 | | -0.64 |
| Q9Y6X5 | Bis(5'-adenosyl)-triphosphatase ENPP4 | 9 | ENPP4 | | -0.64 |
| Q9Y4L1 | Hypoxia up-regulated protein 1 | 54 | HYOU1 | | -0.64 |
| P18084 | Integrin beta-5 | 15 | ITGB5 | | -0.64 |
| Q14847 | LIM and SH3 domain protein 1 | 67 | LASP1 | | -0.64 |
| O00214 | Galectin-8 | 28 | LGALS8 | | -0.64 |
| Q96S06 | Lipase maturation factor 1 | 5 | LMF1 | | -0.64 |
| O15264 | Mitogen-activated protein kinase 13 | 43 | MAPK13 | | -0.64 |
| Q9HCC0 | Methylcrotonoyl-CoA carboxylase beta chain, mitochondrial | 44 | MCCC2 | | -0.64 |
| F8VQZ7 | Methionine aminopeptidase 2 | 46 | METAP2 | | -0.64 |
| O43252 | Bifunctional 3'-phosphoadenosine 5'-phosphosulfate synthase 1 | 26 | PAPSS1 | | -0.64 |
| A0A0C4DGP0 | Cytoplasmic phosphatidylinositol transfer protein 1 | 7 | PITPNC1 | | -0.64 |
| Q04941 | Proteolipid protein 2 | 9 | PLP2 | | -0.64 |
| Q9P035 | Very-long-chain (3R)-3-hydroxyacyl-CoA dehydratase 3 | 26 | PTPLAD1; HACD3 | | -0.64 |
| P50552 | Vasodilator-stimulated phosphoprotein | 35 | VASP | | -0.64 |
| Q9BQE5 | Apolipoprotein L2 | 36 | APOL2 | | -0.65 |
| Q08722 | Leukocyte surface antigen CD47 | 12 | CD47 | | -0.65 |
| Q5VT25 | Serine/threonine-protein kinase MRCK alpha | 10 | CDC42BPA | | -0.65 |
| Q9NZJ6 | Ubiquinone biosynthesis O-methyltransferase, mitochondrial | 19 | COQ3 | | -0.65 |
| P09467 | Fructose-1,6-bisphosphatase 1 | 60 | FBP1 | | -0.65 |
| P21333 | Filamin-A | 64 | FLNA | | -0.65 |
| Q5TF39 | Sodium-dependent glucose transporter 1 | 4 | KIAA1919; MFSD4B | | -0.65 |
| O96007 | Molybdopterin synthase catalytic subunit | 15 | MOCS2 | | -0.65 |
| Q04721 | Neurogenic locus notch homolog protein 2 | 6 | NOTCH2 | | -0.65 |
| Q9HAU0 | Pleckstrin homology domain-containing family A member 5 | 24 | PLEKHA5 | | -0.65 |
| P20338 | Ras-related protein Rab-4A | 31 | RAB4A | | -0.65 |
| Q96CW6 | Probable RNA polymerase II nuclear localization protein SLC7A6OS | 28 | SLC7A6OS | | -0.65 |
| Q6ZVM7 | TOM1-like protein 2 | 25 | TOM1L2 | | -0.65 |
| G5E9G4 | Tetratricopeptide repeat domain 7A, isoform CRA_a | 4 | TTC7A | | -0.65 |
| A2A274 | Aconitate hydratase, mitochondrial | 49 | ACO2 | | -0.66 |
| Q8IV38 | Ankyrin repeat and MYND domain-containing protein 2 | 8 | ANKMY2 | | -0.66 |
| Q9H425 | Uncharacterized protein C1orf198 | 16 | C1orf198 | | -0.66 |
| Q8N357 | Solute carrier family 35 member F6 | 9 | C2orf18; SLC35F6 | | -0.66 |
| Q9Y696 | Chloride intracellular channel protein 4 | 61 | CLIC4 | | -0.66 |
| Q5JRA6 | Transport and Golgi organization protein 1 homolog | 38 | MIA3 | | -0.66 |
| P30101 | Protein disulfide-isomerase A3 | 52 | PDIA3 | | -0.66 |
| P17081 | Rho-related GTP-binding protein RhoQ | 9 | RHOQ | | -0.66 |
| Q8IXI1 | Mitochondrial Rho GTPase 2 | 29 | RHOT2 | | -0.66 |
| O15127 | Secretory carrier-associated membrane protein 2 | 17 | SCAMP2 | | -0.66 |
| P78381 | UDP-galactose translocator | 7 | SLC35A2 | | -0.66 |
| P08842 | Steryl-sulfatase | 5 | STS | | -0.66 |
| P48553 | Trafficking protein particle complex subunit 10 | 8 | TRAPPC10 | | -0.66 |
| Q16864 | V-type proton ATPase subunit F | 17 | ATP6V1F | | -0.67 |
| Q16204 | Coiled-coil domain-containing protein 6 | 44 | CCDC6 | | -0.67 |
| Q9P2B4 | CTTNBP2 N-terminal-like protein | 4 | CTTNBP2NL | | -0.67 |
| Q96CS3 | FAS-associated factor 2 | 40 | FAF2 | | -0.67 |
| Q3ZCQ3 | Membrane protein FAM174B | 20 | FAM174B | | -0.67 |
| P04066 | Tissue alpha-L-fucosidase | 24 | FUCA1 | | -0.67 |
| Q9NZ52 | ADP-ribosylation factor-binding protein GGA3 | 17 | GGA3 | | -0.67 |
| Q9Y653 | Adhesion G-protein coupled receptor G1 | 7 | GPR56; ADGRG1 | | -0.67 |
| Q9Y3E1 | Hepatoma-derived growth factor-related protein 3 | 35 | HDGFRP3; HDGFL3 | | -0.67 |
| Q96CX2 | BTB/POZ domain-containing protein KCTD12 | 24 | KCTD12 | | -0.67 |
| O95456 | Proteasome assembly chaperone 1 | 30 | PSMG1 | | -0.67 |
| Q86YS6 | Ras-related protein Rab-43 | 7 | RAB43 | | -0.67 |
| Q6ZMP0 | Thrombospondin type-1 domain-containing protein 4 | 10 | THSD4 | | -0.67 |
| C9JI98 | Transmembrane protein 238 | 22 | TMEM238 | | -0.67 |
| Q9NP58 | ATP-binding cassette sub-family B member 6, mitochondrial | 37 | ABCB6 | | -0.68 |
| Q96LW7 | Caspase recruitment domain-containing protein 19 | 12 | C9orf89; CARD19 | | -0.68 |
| A0A024R442 | Aspartyl aminopeptidase, isoform CRA_b | 32 | DNPEP | | -0.68 |
| Q9BZQ8 | Protein Niban | 15 | FAM129A | | -0.68 |
| P05165 | Propionyl-CoA carboxylase alpha chain, mitochondrial | 46 | PCCA | | -0.68 |
| A6NDG6 | Glycerol-3-phosphate phosphatase | 41 | PGP | | -0.68 |
| P36952 | Serpin B5 | 15 | SERPINB5 | | -0.68 |
| P19634 | Sodium/hydrogen exchanger 1 | 9 | SLC9A1 | | -0.68 |
| O95630 | STAM-binding protein | 33 | STAMBP | | -0.68 |
| Q9NYJ8 | TGF-beta-activated kinase 1 and MAP3K7-binding protein 2 | 6 | TAB2 | | -0.68 |
| O75467 | Zinc finger protein 324A | 7 | ZNF324 | | -0.68 |
| P00918 | Carbonic anhydrase 2 | 33 | CA2 | | -0.69 |
| O15484 | Calpain-5 | 8 | CAPN5 | | -0.69 |
| Q05639 | Elongation factor 1-alpha 2 | 62 | EEF1A2 | | -0.69 |
| Q9GZT9 | Egl nine homolog 1 | 43 | EGLN1 | | -0.69 |
| P49585 | Choline-phosphate cytidylyltransferase A | 46 | PCYT1A | | -0.69 |
| P45877 | Peptidyl-prolyl cis-trans isomerase C | 15 | PPIC | | -0.69 |
| P07949 | Proto-oncogene tyrosine-protein kinase receptor Ret | 9 | RET | | -0.69 |
| P57057 | Glucose-6-phosphate exchanger SLC37A1 | 5 | SLC37A1 | | -0.69 |
| O60493 | Sorting nexin-3 | 64 | SNX3 | | -0.69 |
| O60784 | Target of Myb protein 1 | 32 | TOM1 | | -0.69 |
| O15231 | Zinc finger protein 185 | 44 | ZNF185 | | -0.69 |
| A0A1B0GVD5 | Cathepsin D | 49 | CTSD | | -0.69 |
| J3QRL7 | N-acetyltransferase 9 | 5 | NAT9 | | -0.69 |
| Q9UII2 | ATPase inhibitor, mitochondrial | 25 | ATPIF1 | | -0.7 |
| Q8IW45 | ATP-dependent (S)-NAD(P)H-hydrate dehydratase | 19 | CARKD; NAXD | | -0.7 |
| O60353 | Frizzled-6 | 18 | FZD6 | | -0.7 |
| Q6EEV6 | Small ubiquitin-related modifier 4 | 23 | SUMO4 | | -0.7 |
| Q9NYU1 | UDP-glucose:glycoprotein glucosyltransferase 2 | 4 | UGGT2 | | -0.7 |
| Q96CM8 | Acyl-CoA synthetase family member 2, mitochondrial | 38 | ACSF2 | | -0.71 |
| Q92934 | Bcl2-associated agonist of cell death | 15 | BAD | | -0.71 |
| Q9Y376 | Calcium-binding protein 39 | 48 | CAB39 | | -0.71 |
| Q13557 | Calcium/calmodulin-dependent protein kinase type II subunit delta | 48 | CAMK2D | | -0.71 |
| P17174 | Aspartate aminotransferase, cytoplasmic | 53 | GOT1 | | -0.71 |
| Q9H0X4 | Protein FAM234A | 9 | ITFG3; FAM234A | | -0.71 |
| P30086 | Phosphatidylethanolamine-binding protein 1 | 64 | PEBP1 | | -0.71 |
| Q92968 | Peroxisomal membrane protein PEX13 | 5 | PEX13 | | -0.71 |
| P14618 | Pyruvate kinase PKM | 71 | PKM | | -0.71 |
| O15162 | Phospholipid scramblase 1 | 9 | PLSCR1 | | -0.71 |
| Q15172 | Serine/threonine-protein phosphatase 2A 56 kDa regulatory subunit alpha isoform | 27 | PPP2R5A | | -0.71 |
| O95084 | Serine protease 23 | 10 | PRSS23 | | -0.71 |
| O75396 | Vesicle-trafficking protein SEC22b | 52 | SEC22B | | -0.71 |
| P53794 | Sodium/myo-inositol cotransporter | 3 | SLC5A3 | | -0.71 |
| Q15599 | Na(+)/H(+) exchange regulatory cofactor NHE-RF2 | 46 | SLC9A3R2 | | -0.71 |
| Q9H3N1 | Thioredoxin-related transmembrane protein 1 | 38 | TMX1 | | -0.71 |
| J3QSU6 | Tenascin | 1 | TNC | | -0.71 |
| Q9H7D7 | WD repeat-containing protein 26 | 25 | WDR26 | | -0.71 |
| C9J8E1 | MAP kinase-activated protein kinase 3 (Fragment) | 17 | MAPKAPK3 | | -0.71 |
| Q7Z3D6 | D-glutamate cyclase, mitochondrial | 23 | C14orf159; DGLUCY | | -0.72 |
| O75976 | Carboxypeptidase D | 35 | CPD | | -0.72 |
| Q14118 | Dystroglycan | 20 | DAG1 | | -0.72 |
| Q9UMR2 | ATP-dependent RNA helicase DDX19B | 43 | DDX19B | | -0.72 |
| F5H269 | DmX-like protein 1 | 4 | DMXL1 | | -0.72 |
| P02794 | Ferritin heavy chain | 36 | FTH1 | | -0.72 |
| P27987 | Inositol-trisphosphate 3-kinase B | 7 | ITPKB | | -0.72 |
| Q13438 | Protein OS-9 | 39 | OS9 | | -0.72 |
| P05166 | Propionyl-CoA carboxylase beta chain, mitochondrial | 56 | PCCB | | -0.72 |
| Q8WXF1 | Paraspeckle component 1 | 27 | PSPC1 | | -0.72 |
| Q9Y5X3 | Sorting nexin-5 | 34 | SNX5 | | -0.72 |
| Q9HB58 | Sp110 nuclear body protein | 11 | SP110 | | -0.72 |
| P62330 | ADP-ribosylation factor 6 | 66 | ARF6 | | -0.73 |
| Q8N668 | COMM domain-containing protein 1 | 12 | COMMD1 | | -0.73 |
| P11182 | Lipoamide acyltransferase component of branched-chain alpha-keto acid dehydrogenase complex, mitochondrial | 23 | DBT | | -0.73 |
| P15311 | Ezrin | 63 | EZR | | -0.73 |
| Q8NC44 | Reticulophagy regulator 2 | 8 | FAM134A; RETREG2 | | -0.73 |
| P49327 | Fatty acid synthase | 55 | FASN | | -0.73 |
| P04406 | Glyceraldehyde-3-phosphate dehydrogenase | 64 | GAPDH | | -0.73 |
| P16383 | GC-rich sequence DNA-binding factor 2 | 15 | GCFC2 | | -0.73 |
| P17050 | Alpha-N-acetylgalactosaminidase | 18 | NAGA | | -0.73 |
| P62834 | Ras-related protein Rap-1A | 52 | RAP1A | | -0.73 |
| O15374 | Monocarboxylate transporter 5 | 2 | SLC16A4 | | -0.73 |
| Q9NUQ6 | SPATS2-like protein | 55 | SPATS2L | | -0.73 |
| Q9P2C4 | Transmembrane protein 181 | 5 | TMEM181 | | -0.73 |
| K7EL68 | Hsp90 co-chaperone Cdc37 (Fragment) | 46 | CDC37 | | -0.73 |
| F6U1T9 | Calcineurin subunit B type 1 | 47 | PPP3R1 | | -0.73 |
| P12532 | Creatine kinase U-type, mitochondrial | 43 | CKMT1B; CKMT1A | | -0.74 |
| Q8NE01 | Metal transporter CNNM3 | 28 | CNNM3 | | -0.74 |
| O75061 | Putative tyrosine-protein phosphatase auxilin | 5 | DNAJC6 | | -0.74 |
| B1AKC9 | Ephrin type-B receptor 2 | 6 | EPHB2 | | -0.74 |
| O75369 | Filamin-B | 64 | FLNB | | -0.74 |
| O95644 | Nuclear factor of activated T-cells, cytoplasmic 1 | 2 | NFATC1 | | -0.74 |
| P62341 | Thioredoxin reductase-like selenoprotein T | 15 | SELT; SELENOT | | -0.74 |
| P51687 | Sulfite oxidase, mitochondrial | 10 | SUOX | | -0.74 |
| Q9H1B5 | Xylosyltransferase 2 | 10 | XYLT2 | | -0.74 |
| O75348 | V-type proton ATPase subunit G 1 | 36 | ATP6V1G1 | | -0.75 |
| O14867 | Transcription regulator protein BACH1 | 3 | BACH1 | | -0.75 |
| P25686 | DnaJ homolog subfamily B member 2 | 27 | DNAJB2 | | -0.75 |
| O15327 | Type II inositol 3,4-bisphosphate 4-phosphatase | 39 | INPP4B | | -0.75 |
| Q96CN7 | Isochorismatase domain-containing protein 1 | 40 | ISOC1 | | -0.75 |
| Q6P1A2 | Lysophospholipid acyltransferase 5 | 18 | LPCAT3 | | -0.75 |
| Q9NTJ4 | Alpha-mannosidase 2C1 | 14 | MAN2C1 | | -0.75 |
| P51608 | Methyl-CpG-binding protein 2 | 51 | MECP2 | | -0.75 |
| A0A0R4J2G3 | Arylacetamide deacetylase-like 1 | 31 | NCEH1 | | -0.75 |
| P48454 | Serine/threonine-protein phosphatase 2B catalytic subunit gamma isoform | 8 | PPP3CC | | -0.75 |
| P17735 | Tyrosine aminotransferase | 24 | TAT | | -0.75 |
| Q9Y3A6 | Transmembrane emp24 domain-containing protein 5 | 21 | TMED5 | | -0.75 |
| Q9Y2I8 | WD repeat-containing protein 37 | 13 | WDR37 | | -0.75 |
| P0CJ78 | Zinc finger protein 865 | 1 | ZNF865 | | -0.75 |
| A0A1B0GVW0 | Renin receptor | 19 | ATP6AP2 | | -0.75 |
| H7BZH9 | Protein prune homolog 2 (Fragment) | 1 | PRUNE2 | | -0.75 |
| P51798 | H(+)/Cl(-) exchange transporter 7 | 17 | CLCN7 | | -0.76 |
| Q9UHY7 | Enolase-phosphatase E1 | 40 | ENOPH1 | | -0.76 |
| Q02742 | Beta-1,3-galactosyl-O-glycosyl-glycoprotein beta-1,6-N-acetylglucosaminyltransferase | 16 | GCNT1 | | -0.76 |
| Q8TB96 | T-cell immunomodulatory protein | 8 | ITFG1 | | -0.76 |
| P40925 | Malate dehydrogenase, cytoplasmic | 48 | MDH1 | | -0.76 |
| Q86XN8 | RNA-binding protein MEX3D | 11 | MEX3D | | -0.76 |
| P18669 | Phosphoglycerate mutase 1 | 56 | PGAM1; LOC643576 | | -0.76 |
| Q9UPN7 | Serine/threonine-protein phosphatase 6 regulatory subunit 1 | 25 | PPP6R1 | | -0.76 |
| F8W8I6 | Nucleolysin TIA-1 isoform p40 | 23 | TIA1 | | -0.76 |
| Q9Y3Q3 | Transmembrane emp24 domain-containing protein 3 | 23 | TMED3 | | -0.76 |
| Q5T4D3 | Transmembrane and TPR repeat-containing protein 4 | 7 | TMTC4 | | -0.76 |
| Q70J99 | Protein unc-13 homolog D | 7 | UNC13D | | -0.76 |
| A0A087WXL6 | Vacuolar protein sorting 11 (Yeast), isoform CRA_a | 19 | VPS11 | | -0.76 |
| K7EIN2 | Tudor-interacting repair regulator protein (Fragment) | 44 | NUDT16L1 | | -0.76 |
| F8W9W2 | G protein-coupled receptor kinase | 33 | GRK6 | | -0.76 |
| E7EPU2 | Disco-interacting protein 2 homolog C | 5 | DIP2C | | -0.76 |
| P12821 | Angiotensin-converting enzyme | 22 | ACE | | -0.77 |
| Q9Y5P4 | Collagen type IV alpha-3-binding protein | 28 | COL4A3BP | | -0.77 |
| Q9Y2Z9 | Ubiquinone biosynthesis monooxygenase COQ6, mitochondrial | 8 | COQ6 | | -0.77 |
| Q9Y315 | Deoxyribose-phosphate aldolase | 59 | DERA | | -0.77 |
| Q6XZF7 | Dynamin-binding protein | 2 | DNMBP | | -0.77 |
| O60524 | Nuclear export mediator factor NEMF | 21 | NEMF | | -0.77 |
| Q8IXQ6 | Poly [ADP-ribose] polymerase 9 | 11 | PARP9 | | -0.77 |
| O00562 | Membrane-associated phosphatidylinositol transfer protein 1 | 2 | PITPNM1 | | -0.77 |
| Q9HBL7 | Plasminogen receptor (KT) | 31 | PLGRKT | | -0.77 |
| Q8IWA5 | Choline transporter-like protein 2 | 14 | SLC44A2 | | -0.77 |
| P62328 | Thymosin beta-4 | 55 | TMSB4X | | -0.77 |
| Q8NG11 | Tetraspanin-14 | 17 | TSPAN14 | | -0.77 |
| Q9UN37 | Vacuolar protein sorting-associated protein 4A | 32 | VPS4A | | -0.77 |
| H7C2D8 | Melanophilin (Fragment) | 35 | MLPH | | -0.77 |
| Q6ZUS6 | Coiled-coil domain-containing protein 149 | 7 | CCDC149 | | -0.78 |
| O75223 | Gamma-glutamylcyclotransferase | 54 | GGCT | | -0.78 |
| P05787 | Keratin, type II cytoskeletal 8 | 70 | KRT8 | | -0.78 |
| O95461 | LARGE xylosyl- and glucuronyltransferase 1 | 7 | LARGE; LARGE1 | | -0.78 |
| Q9BRK4 | Leucine zipper putative tumor suppressor 2 | 12 | LZTS2 | | -0.78 |
| Q6UX53 | Methyltransferase-like protein 7B | 31 | METTL7B | | -0.78 |
| Q9H2D6 | TRIO and F-actin-binding protein | 2 | TRIOBP | | -0.78 |
| E7EUC7 | UTP--glucose-1-phosphate uridylyltransferase | 46 | UGP2 | | -0.78 |
| Q96A22 | Uncharacterized protein C11orf52 | 20 | C11orf52 | | -0.79 |
| Q86X02 | Cerebellar degeneration-related protein 2-like | 23 | CDR2L | | -0.79 |
| O95749 | Geranylgeranyl pyrophosphate synthase | 19 | GGPS1 | | -0.79 |
| P62745 | Rho-related GTP-binding protein RhoB | 36 | RHOB | | -0.79 |
| C9JFR7 | Cytochrome c (Fragment) | 63 | CYCS | | -0.79 |
| P13798 | Acylamino-acid-releasing enzyme | 34 | APEH | | -0.8 |
| Q5VW32 | BRO1 domain-containing protein BROX | 31 | BROX | | -0.8 |
| Q8WU39 | Marginal zone B- and B1-cell-specific protein | 38 | MZB1 | | -0.8 |
| P50454 | Serpin H1 | 51 | SERPINH1 | | -0.8 |
| Q9P0V3 | SH3 domain-binding protein 4 | 21 | SH3BP4 | | -0.8 |
| Q9UGT4 | Sushi domain-containing protein 2 | 1 | SUSD2 | | -0.8 |
| Q8WUH2 | Transforming growth factor-beta receptor-associated protein 1 | 8 | TGFBRAP1 | | -0.8 |
| Q8NB50 | Zinc finger protein 62 homolog | 2 | ZFP62 | | -0.8 |
| F6SFZ6 | P2X purinoceptor 4 | 16 | P2RX4 | | -0.8 |
| D3YTK1 | B-cell lymphoma/leukemia 11B | 4 | BCL11B | | -0.8 |
| Q9NRZ7 | 1-acyl-sn-glycerol-3-phosphate acyltransferase gamma | 16 | AGPAT3 | | -0.81 |
| J3KN59 | BCL2/adenovirus E1B 19 kDa protein-interacting protein 2 | 7 | BNIP2 | | -0.81 |
| Q5T0W9 | Protein FAM83B | 19 | FAM83B | | -0.81 |
| P52848 | Bifunctional heparan sulfate N-deacetylase/N-sulfotransferase 1 | 7 | NDST1 | | -0.81 |
| Q9UMX5 | Neudesin | 32 | NENF | | -0.81 |
| Q99447 | Ethanolamine-phosphate cytidylyltransferase | 26 | PCYT2 | | -0.81 |
| O75716 | Serine/threonine-protein kinase 16 | 7 | STK16 | | -0.81 |
| Q96I99 | Succinate--CoA ligase [GDP-forming] subunit beta, mitochondrial | 56 | SUCLG2 | | -0.81 |
| Q9BVK6 | Transmembrane emp24 domain-containing protein 9 | 32 | TMED9 | | -0.81 |
| E7EX90 | Dynactin subunit 1 | 48 | DCTN1 | | -0.81 |
| A0A0J9YWM6 | Alpha-aminoadipic semialdehyde dehydrogenase (Fragment) | 83 | ALDH7A1 | | -0.81 |
| B9ZVU2 | Aspartyl aminopeptidase (Fragment) | 29 | DNPEP | | -0.81 |
| Q96A54 | Adiponectin receptor protein 1 | 22 | ADIPOR1 | | -0.82 |
| Q8TDB6 | E3 ubiquitin-protein ligase DTX3L | 17 | DTX3L | | -0.82 |
| Q9BTY2 | Plasma alpha-L-fucosidase | 32 | FUCA2 | | -0.82 |
| P11166 | Solute carrier family 2, facilitated glucose transporter member 1 | 14 | SLC2A1 | | -0.82 |
| Q7Z7L1 | Schlafen family member 11 | 20 | SLFN11 | | -0.82 |
| P57768 | Sorting nexin-16 | 33 | SNX16 | | -0.82 |
| Q9UNE7 | E3 ubiquitin-protein ligase CHIP | 56 | STUB1 | | -0.82 |
| Q969E4 | Transcription elongation factor A protein-like 3 | 39 | TCEAL3 | | -0.82 |
| P15923 | Transcription factor E2-alpha | 3 | TCF3 | | -0.82 |
| Q8TAA9 | Vang-like protein 1 | 10 | VANGL1 | | -0.82 |
| Q8N4Q0 | Prostaglandin reductase 3 | 15 | ZADH2 | | -0.82 |
| A0A2R8Y7R4 | Small integral membrane protein 1 (Fragment) | 22 | SMIM1 | | -0.82 |
| Q9UHL4 | Dipeptidyl peptidase 2 | 19 | DPP7 | | -0.83 |
| A8MTY9 | VPS26 endosomal protein sorting factor C | 37 | DSCR3 | | -0.83 |
| Q5JSP0 | FYVE, RhoGEF and PH domain-containing protein 3 | 9 | FGD3 | | -0.83 |
| O75487 | Glypican-4 | 14 | GPC4 | | -0.83 |
| Q8N335 | Glycerol-3-phosphate dehydrogenase 1-like protein | 49 | GPD1L | | -0.83 |
| Q9UKK3 | Poly [ADP-ribose] polymerase 4 | 5 | PARP4 | | -0.83 |
| P16260 | Graves disease carrier protein | 6 | SLC25A16 | | -0.83 |
| Q9ULP9 | TBC1 domain family member 24 | 26 | TBC1D24 | | -0.83 |
| O76024 | Wolframin | 27 | WFS1 | | -0.83 |
| A0A096LP25 | AP2-associated protein kinase 1 (Fragment) | 28 | AAK1 | | -0.83 |
| C9J3D7 | Peroxisomal carnitine O-octanoyltransferase | 9 | CROT | | -0.83 |
| O14967 | Calmegin | 26 | CLGN | | -0.84 |
| P04150 | Glucocorticoid receptor | 2 | NR3C1 | | -0.84 |
| Q9H939 | Proline-serine-threonine phosphatase-interacting protein 2 | 28 | PSTPIP2 | | -0.84 |
| J3KS94 | Myelin basic protein (Fragment) | 20 | MBP | | -0.84 |
| A0A087X033 | Phosphatidylinositol 3,4,5-trisphosphate 3-phosphatase and dual-specificity protein phosphatase PTEN (Fragment) | 30 | PTEN | | -0.84 |
| O43306 | Adenylate cyclase type 6 | 3 | ADCY6 | | -0.85 |
| O43520 | Phospholipid-transporting ATPase IC | 28 | ATP8B1 | | -0.85 |
| P21953 | 2-oxoisovalerate dehydrogenase subunit beta, mitochondrial | 12 | BCKDHB | | -0.85 |
| O00115 | Deoxyribonuclease-2-alpha | 15 | DNASE2 | | -0.85 |
| O95278 | Laforin | 2 | EPM2A | | -0.85 |
| Q9UHB6 | LIM domain and actin-binding protein 1 | 59 | LIMA1 | | -0.85 |
| Q9BRT3 | Migration and invasion enhancer 1 | 33 | MIEN1 | | -0.85 |
| Q7Z406 | Myosin-14 | 49 | MYH14 | | -0.85 |
| Q9Y3P4 | Rhomboid domain-containing protein 3 | 13 | RHBDD3 | | -0.85 |
| A0A087WXD1 | Sodium/hydrogen exchanger | 14 | SLC9A7 | | -0.85 |
| Q96HN2 | Adenosylhomocysteinase 3 | 30 | AHCYL2 | | -0.86 |
| P04626 | Receptor tyrosine-protein kinase erbB-2 | 37 | ERBB2 | | -0.86 |
| Q96C01 | Protein FAM136A | 30 | FAM136A | | -0.86 |
| A0A0A0MT01 | Gelsolin | 37 | GSN | | -0.86 |
| Q92484 | Acid sphingomyelinase-like phosphodiesterase 3a | 6 | SMPDL3A | | -0.86 |
| F5GYQ1 | V-type proton ATPase subunit | 39 | ATP6V0D1 | | -0.87 |
| O75110 | Probable phospholipid-transporting ATPase IIA | 21 | ATP9A | | -0.87 |
| Q9H993 | Protein-glutamate O-methyltransferase | 45 | C6orf211; ARMT1 | | -0.87 |
| Q9Y5B0 | RNA polymerase II subunit A C-terminal domain phosphatase | 22 | CTDP1 | | -0.87 |
| Q7L5Y1 | Mitochondrial enolase superfamily member 1 | 46 | ENOSF1 | | -0.87 |
| M0QY43 | Myosin-14 (Fragment) | 45 | MYH14 | | -0.87 |
| Q8TDL5 | BPI fold-containing family B member 1 | 12 | BPIFB1 | | -0.88 |
| Q9H3Z4 | DnaJ homolog subfamily C member 5 | 33 | DNAJC5 | | -0.88 |
| Q9Y4F1 | FERM, ARHGEF and pleckstrin domain-containing protein 1 | 21 | FARP1 | | -0.88 |
| Q4ZG55 | Protein GREB1 | 25 | GREB1 | | -0.88 |
| O60268 | Uncharacterized protein KIAA0513 | 15 | KIAA0513 | | -0.88 |
| O00391 | Sulfhydryl oxidase 1 | 23 | QSOX1 | | -0.88 |
| Q14257 | Reticulocalbin-2 | 57 | RCN2 | | -0.88 |
| Q5T5C7 | Serine--tRNA ligase, cytoplasmic | 45 | SARS | | -0.88 |
| Q0P6H9 | Transmembrane protein 62 | 5 | TMEM62 | | -0.88 |
| Q14669 | E3 ubiquitin-protein ligase TRIP12 | 20 | TRIP12 | | -0.88 |
| P16870 | Carboxypeptidase E | 13 | CPE | | -0.89 |
| P00167 | Cytochrome b5 | 27 | CYB5A | | -0.89 |
| Q16678 | Cytochrome P450 1B1 | 19 | CYP1B1 | | -0.89 |
| P16930 | Fumarylacetoacetase | 21 | FAH | | -0.89 |
| Q9NRV9 | Heme-binding protein 1 | 60 | HEBP1 | | -0.89 |
| P23229 | Integrin alpha-6 | 29 | ITGA6 | | -0.89 |
| Q9NZU5 | LIM and cysteine-rich domains protein 1 | 44 | LMCD1 | | -0.89 |
| Q8WX93 | Palladin | 10 | PALLD | | -0.89 |
| Q8TF72 | Protein Shroom3 | 12 | SHROOM3 | | -0.89 |
| Q9Y365 | START domain-containing protein 10 | 63 | STARD10 | | -0.89 |
| Q9Y4G6 | Talin-2 | 19 | TLN2 | | -0.89 |
| K4DIA7 | CD151 antigen (Fragment) | 15 | CD151 | | -0.89 |
| Q92747 | Actin-related protein 2/3 complex subunit 1A | 31 | ARPC1A | | -0.9 |
| Q9UI12 | V-type proton ATPase subunit H | 36 | ATP6V1H | | -0.9 |
| Q10471 | Polypeptide N-acetylgalactosaminyltransferase 2 | 31 | GALNT2 | | -0.9 |
| Q9H0V9 | VIP36-like protein | 18 | LMAN2L | | -0.9 |
| Q92604 | Acyl-CoA:lysophosphatidylglycerol acyltransferase 1 | 28 | LPGAT1 | | -0.9 |
| P45984 | Mitogen-activated protein kinase 9 | 13 | MAPK9 | | -0.9 |
| Q5JVM0 | Unconventional myosin-VI (Fragment) | 49 | MYO6 | | -0.9 |
| P80303 | Nucleobindin-2 | 55 | NUCB2 | | -0.9 |
| P17858 | ATP-dependent 6-phosphofructokinase, liver type | 47 | PFKL | | -0.9 |
| Q96CC6 | Inactive rhomboid protein 1 | 6 | RHBDF1 | | -0.9 |
| Q9BRK5 | 45 kDa calcium-binding protein | 38 | SDF4 | | -0.9 |
| Q8IYJ3 | Synaptotagmin-like protein 1 | 3 | SYTL1 | | -0.9 |
| H7C5L4 | Filamin-B (Fragment) | 53 | FLNB | | -0.9 |
| Q8IZ83 | Aldehyde dehydrogenase family 16 member A1 | 25 | ALDH16A1 | | -0.91 |
| Q8IUX4 | DNA dC->dU-editing enzyme APOBEC-3F | 10 | APOBEC3F | | -0.91 |
| P27824 | Calnexin | 46 | CANX | | -0.91 |
| P07902 | Galactose-1-phosphate uridylyltransferase | 16 | GALT | | -0.91 |
| P07686 | Beta-hexosaminidase subunit beta | 23 | HEXB | | -0.91 |
| J3QRV5 | Lethal(2) giant larvae protein homolog 2 | 37 | LLGL2 | | -0.91 |
| Q99519 | Sialidase-1 | 13 | NEU1 | | -0.91 |
| O15211 | Ral guanine nucleotide dissociation stimulator-like 2 | 11 | RGL2 | | -0.91 |
| P48436 | Transcription factor SOX-9 | 11 | SOX9 | | -0.91 |
| F5H5P2 | 2-oxoisovalerate dehydrogenase subunit alpha | 17 | N/A | | -0.91 |
| O15440 | Multidrug resistance-associated protein 5 | 14 | ABCC5 | | -0.92 |
| E7EWW0 | VPS35 endosomal protein sorting factor-like | 18 | C16orf62 | | -0.92 |
| P27797 | Calreticulin | 66 | CALR | | -0.92 |
| P07099 | Epoxide hydrolase 1 | 41 | EPHX1 | | -0.92 |
| P05783 | Keratin, type I cytoskeletal 18 | 69 | KRT18 | | -0.92 |
| Q9BXW6 | Oxysterol-binding protein-related protein 1 | 13 | OSBPL1A | | -0.92 |
| P07237 | Protein disulfide-isomerase | 68 | P4HB | | -0.92 |
| A6PW57 | Phosphatidylinositol 4-phosphate 5-kinase type-1 alpha | 14 | PIP5K1A | | -0.92 |
| Q8N271 | Prominin-2 | 11 | PROM2 | | -0.92 |
| Q15276 | Rab GTPase-binding effector protein 1 | 43 | RABEP1 | | -0.92 |
| I3L4A1 | Charged multivesicular body protein 6 (Fragment) | 21 | CHMP6 | | -0.92 |
| D6RHI9 | Ribonuclease T2 (Fragment) | 41 | RNASET2 | | -0.92 |
| P49448 | Glutamate dehydrogenase 2, mitochondrial | 36 | GLUD2 | | -0.93 |
| P63218 | Guanine nucleotide-binding protein G(I)/G(S)/G(O) subunit gamma-5 | 24 | GNG5 | | -0.93 |
| Q08209 | Serine/threonine-protein phosphatase 2B catalytic subunit alpha isoform | 24 | PPP3CA | | -0.93 |
| Q8N7X1 | RNA-binding motif protein, X-linked-like-3 | 2 | RBMXL3 | | -0.93 |
| Q99805 | Transmembrane 9 superfamily member 2 | 19 | TM9SF2 | | -0.93 |
| K7EPR5 | cAMP-dependent protein kinase type I-alpha regulatory subunit (Fragment) | 64 | PRKAR1A | | -0.93 |
| P36543 | V-type proton ATPase subunit E 1 | 41 | ATP6V1E1 | | -0.94 |
| Q14956 | Transmembrane glycoprotein NMB | 9 | GPNMB | | -0.94 |
| Q16836 | Hydroxyacyl-coenzyme A dehydrogenase, mitochondrial | 41 | HADH | | -0.94 |
| Q14469 | Transcription factor HES-1 | 11 | HES1 | | -0.94 |
| Q8NI22 | Multiple coagulation factor deficiency protein 2 | 12 | MCFD2 | | -0.94 |
| Q9UHG3 | Prenylcysteine oxidase 1 | 44 | PCYOX1 | | -0.94 |
| P52306 | Rap1 GTPase-GDP dissociation stimulator 1 | 37 | RAP1GDS1 | | -0.94 |
| Q8NBN7 | Retinol dehydrogenase 13 | 37 | RDH13 | | -0.94 |
| P55011 | Solute carrier family 12 member 2 | 32 | SLC12A2 | | -0.94 |
| P36021 | Monocarboxylate transporter 8 | 7 | SLC16A2 | | -0.94 |
| B8ZZZ1 | AP complex subunit sigma | 11 | AP1S3 | | -0.94 |
| Q5TCQ9 | Membrane-associated guanylate kinase, WW and PDZ domain-containing protein 3 | 8 | MAGI3 | | -0.94 |
| Q8N0W3 | L-fucose kinase | 23 | FUK | | -0.95 |
| P18283 | Glutathione peroxidase 2 | 52 | GPX2 | | -0.95 |
| A0A0B4J2E8 | Calcium release-activated calcium channel protein 1 | 14 | ORAI1 | | -0.95 |
| F8VWK8 | Tetraspanin (Fragment) | 12 | CD63 | | -0.95 |
| H3BTN8 | 5-demethoxyubiquinone hydroxylase, mitochondrial (Fragment) | 7 | COQ7 | | -0.95 |
| P55210 | Caspase-7 | 30 | CASP7 | | -0.96 |
| Q01459 | Di-N-acetylchitobiase | 14 | CTBS | | -0.96 |
| Q14571 | Inositol 1,4,5-trisphosphate receptor type 2 | 19 | ITPR2 | | -0.96 |
| Q9H4B6 | Protein salvador homolog 1 | 19 | SAV1 | | -0.96 |
| Q3MIR4 | Cell cycle control protein 50B | 8 | TMEM30B | | -0.96 |
| P07305 | Histone H1.0 | 31 | H1F0 | | -0.97 |
| Q9UDY8 | Mucosa-associated lymphoid tissue lymphoma translocation protein 1 | 12 | MALT1 | | -0.97 |
| O75116 | Rho-associated protein kinase 2 | 34 | ROCK2 | | -0.97 |
| A0A1W2PR45 | Lactosylceramide alpha-2,3-sialyltransferase | 5 | ST3GAL5 | | -0.97 |
| O75351 | Vacuolar protein sorting-associated protein 4B | 36 | VPS4B | | -0.97 |
| Q9Y6I3 | Epsin-1 | 31 | EPN1 | | -0.98 |
| O60547 | GDP-mannose 4,6 dehydratase | 44 | GMDS | | -0.98 |
| Q7Z3T8 | Zinc finger FYVE domain-containing protein 16 | 9 | ZFYVE16 | | -0.98 |
| O75915 | PRA1 family protein 3 | 24 | ARL6IP5 | | -0.99 |
| P54709 | Sodium/potassium-transporting ATPase subunit beta-3 | 37 | ATP1B3 | | -0.99 |
| O14647 | Chromodomain-helicase-DNA-binding protein 2 | 4 | CHD2 | | -0.99 |
| Q12929 | Epidermal growth factor receptor kinase substrate 8 | 29 | EPS8 | | -0.99 |
| P10620 | Microsomal glutathione S-transferase 1 | 26 | MGST1 | | -0.99 |
| O60331 | Phosphatidylinositol 4-phosphate 5-kinase type-1 gamma | 13 | PIP5K1C | | -0.99 |
| Q5W0Z9 | Palmitoyltransferase ZDHHC20 | 22 | ZDHHC20 | | -0.99 |
| Q9HD20 | Manganese-transporting ATPase 13A1 | 36 | ATP13A1 | | -1 |
| Q9NZ08 | Endoplasmic reticulum aminopeptidase 1 | 17 | ERAP1 | | -1 |
| P35052 | Glypican-1 | 14 | GPC1 | | -1 |
| P05114 | Non-histone chromosomal protein HMG-14 | 58 | HMGN1 | | -1 |
| P17301 | Integrin alpha-2 | 22 | ITGA2 | | -1 |
| Q96PU5 | E3 ubiquitin-protein ligase NEDD4-like | 18 | NEDD4L | | -1 |
| Q9P270 | SLAIN motif-containing protein 2 | 28 | SLAIN2 | | -1 |
| O43488 | Aflatoxin B1 aldehyde reductase member 2 | 32 | AKR7A2 | | -1.01 |
| P09525 | Annexin A4 | 63 | ANXA4 | | -1.01 |
| Q6ZUT6 | Coiled-coil domain-containing protein 9B | 15 | C15orf52; CCDC9B | | -1.01 |
| Q5T0I0 | Gelsolin (Fragment) | 37 | GSN | | -1.01 |
| Q5T321 | Neurobeachin, isoform CRA_e | 6 | NBEA | | -1.01 |
| Q92982 | Ninjurin-1 | 8 | NINJ1 | | -1.01 |
| O43175 | D-3-phosphoglycerate dehydrogenase | 51 | PHGDH | | -1.01 |
| A4D1S5 | Ras-related protein Rab-19 | 25 | RAB19 | | -1.01 |
| Q8IWB9 | Testis-expressed protein 2 | 29 | TEX2 | | -1.01 |
| F2Z2Y4 | Pyridoxal kinase | 41 | PDXK | | -1.02 |
| O75368 | SH3 domain-binding glutamic acid-rich-like protein | 69 | SH3BGRL | | -1.02 |
| D6RB85 | Calnexin (Fragment) | 51 | CANX | | -1.02 |
| Q17RN3 | Protein FAM98C | 48 | FAM98C | | -1.03 |
| P56159 | GDNF family receptor alpha-1 | 23 | GFRA1 | | -1.03 |
| P19838 | Nuclear factor NF-kappa-B p105 subunit | 16 | NFKB1 | | -1.03 |
| Q8NHP8 | Putative phospholipase B-like 2 | 23 | PLBD2 | | -1.03 |
| A0A096LNH6 | Dedicator of cytokinesis protein 1 | 5 | DOCK1 | | -1.03 |
| Q13740 | CD166 antigen | 37 | ALCAM | | -1.04 |
| Q96T60 | Bifunctional polynucleotide phosphatase/kinase | 34 | PNKP | | -1.04 |
| P07858 | Cathepsin B | 8 | CTSB | | -1.05 |
| O43790 | Keratin, type II cuticular Hb6 | 12 | KRT86 | | -1.05 |
| Q9HC84 | Mucin-5B | 19 | MUC5B | | -1.05 |
| Q8WUY8 | N-acetyltransferase 14 | 25 | NAT14 | | -1.05 |
| A8MTC6 | RAB37, member RAS oncogene family, isoform CRA_a | 37 | RAB37 | | -1.05 |
| O15119 | T-box transcription factor TBX3 | 10 | TBX3 | | -1.05 |
| Q6UWJ1 | Transmembrane and coiled-coil domain-containing protein 3 | 9 | TMCO3 | | -1.05 |
| P05023 | Sodium/potassium-transporting ATPase subunit alpha-1 | 47 | ATP1A1 | | -1.06 |
| Q9HBG4 | V-type proton ATPase 116 kDa subunit a isoform 4 | 28 | ATP6V0A4 | | -1.06 |
| P04080 | Cystatin-B | 29 | CSTB | | -1.06 |
| F5H757 | Cytochrome b561 | 11 | CYB561 | | -1.06 |
| Q9H1C7 | Cysteine-rich and transmembrane domain-containing protein 1 | 10 | CYSTM1 | | -1.06 |
| Q5JSL0 | High mobility group nucleosome-binding domain-containing protein 5 (Fragment) | 64 | HMGN5 | | -1.06 |
| Q9H5N1 | Rab GTPase-binding effector protein 2 | 54 | RABEP2 | | -1.06 |
| Q96JJ7 | Protein disulfide-isomerase TMX3 | 24 | TMX3 | | -1.06 |
| O75954 | Tetraspanin-9 | 25 | TSPAN9 | | -1.06 |
| I3L1H3 | Lipopolysaccharide-induced tumor necrosis factor-alpha factor | 21 | LITAF | | -1.06 |
| K7ENV7 | Isochorismatase domain-containing protein 2 (Fragment) | 29 | ISOC2 | | -1.06 |
| O43491 | Band 4.1-like protein 2 | 40 | EPB41L2 | | -1.07 |
| Q9H857 | 5'-nucleotidase domain-containing protein 2 | 27 | NT5DC2 | | -1.07 |
| A0A1P0AYU5 | Sideroflexin | 35 | SFXN3 | | -1.07 |
| Q7Z4W1 | L-xylulose reductase | 41 | DCXR | | -1.08 |
| P22570 | NADPH:adrenodoxin oxidoreductase, mitochondrial | 60 | FDXR | | -1.08 |
| Q53T59 | HCLS1-binding protein 3 | 47 | HS1BP3 | | -1.08 |
| Q9P260 | LisH domain and HEAT repeat-containing protein KIAA1468 | 7 | KIAA1468 | | -1.08 |
| Q9NZM1 | Myoferlin | 55 | MYOF | | -1.08 |
| P10644 | cAMP-dependent protein kinase type I-alpha regulatory subunit | 46 | PRKAR1A | | -1.08 |
| Q5T123 | SH3 domain-binding glutamic acid-rich-like protein 3 | 41 | SH3BGRL3 | | -1.08 |
| A0A1B0GTB0 | Renin receptor (Fragment) | 22 | ATP6AP2 | | -1.08 |
| E9PN41 | Tetraspanin-4 (Fragment) | 11 | TSPAN4 | | -1.08 |
| Q8IWB7 | WD repeat and FYVE domain-containing protein 1 | 17 | WDFY1 | | -1.09 |
| F5H300 | DnaJ homolog subfamily A member 4 | 29 | DNAJA4 | | -1.09 |
| P10253 | Lysosomal alpha-glucosidase | 15 | GAA | | -1.1 |
| Q9NZC3 | Glycerophosphodiester phosphodiesterase 1 | 19 | GDE1 | | -1.1 |
| Q9UJ70 | N-acetyl-D-glucosamine kinase | 33 | NAGK | | -1.1 |
| Q15084 | Protein disulfide-isomerase A6 | 44 | PDIA6 | | -1.1 |
| H7BYY1 | Tropomyosin 1 (Alpha), isoform CRA_m | 55 | TPM1 | | -1.1 |
| Q15067 | Peroxisomal acyl-coenzyme A oxidase 1 | 40 | ACOX1 | | -1.11 |
| O43776 | Asparagine--tRNA ligase, cytoplasmic | 47 | NARS | | -1.11 |
| Q9NYG2 | Palmitoyltransferase ZDHHC3 | 6 | ZDHHC3 | | -1.11 |
| Q9H3Q1 | Cdc42 effector protein 4 | 38 | CDC42EP4 | | -1.12 |
| Q9BWS9 | Chitinase domain-containing protein 1 | 16 | CHID1 | | -1.12 |
| Q14849 | StAR-related lipid transfer protein 3 | 32 | STARD3 | | -1.12 |
| Q9H7S9 | Zinc finger protein 703 | 4 | ZNF703 | | -1.12 |
| P55212 | Caspase-6 | 34 | CASP6 | | -1.13 |
| Q8WW22 | DnaJ homolog subfamily A member 4 | 46 | DNAJA4 | | -1.13 |
| Q96HH9 | GRAM domain-containing protein 2B | 9 | GRAMD3; GRAMD2B | | -1.13 |
| Q92743 | Serine protease HTRA1 | 11 | HTRA1 | | -1.13 |
| Q13641 | Trophoblast glycoprotein | 20 | TPBG | | -1.13 |
| Q8N584 | Tetratricopeptide repeat protein 39C | 21 | TTC39C | | -1.13 |
| P30040 | Endoplasmic reticulum resident protein 29 | 59 | ERP29 | | -1.14 |
| Q92887 | Canalicular multispecific organic anion transporter 1 | 19 | ABCC2 | | -1.15 |
| Q92820 | Gamma-glutamyl hydrolase | 39 | GGH | | -1.15 |
| Q9Y2G5 | GDP-fucose protein O-fucosyltransferase 2 | 14 | POFUT2 | | -1.15 |
| Q96BR1 | Serine/threonine-protein kinase Sgk3 | 9 | SGK3; C8orf44-SGK3 | | -1.15 |
| Q9HA65 | TBC1 domain family member 17 | 9 | TBC1D17 | | -1.15 |
| H0YKH9 | Alpha-mannosidase 2x (Fragment) | 3 | MAN2A2 | | -1.15 |
| P12429 | Annexin A3 | 37 | ANXA3 | | -1.16 |
| P34059 | N-acetylgalactosamine-6-sulfatase | 15 | GALNS | | -1.16 |
| A4D126 | D-ribitol-5-phosphate cytidylyltransferase | 2 | ISPD | | -1.16 |
| P49257 | Protein ERGIC-53 | 43 | LMAN1 | | -1.17 |
| Q9Y3M8 | StAR-related lipid transfer protein 13 | 13 | STARD13 | | -1.17 |
| Q92481 | Transcription factor AP-2-beta | 24 | TFAP2B | | -1.17 |
| P30711 | Glutathione S-transferase theta-1 | 26 | GSTT1 | | -1.18 |
| P38606 | V-type proton ATPase catalytic subunit A | 38 | ATP6V1A | | -1.19 |
| Q8N8J7 | Uncharacterized protein FAM241A | 27 | C4orf32; FAM241A | | -1.19 |
| P46934 | E3 ubiquitin-protein ligase NEDD4 | 15 | NEDD4 | | -1.19 |
| P09497 | Clathrin light chain B | 31 | CLTB | | -1.2 |
| Q96KP4 | Cytosolic non-specific dipeptidase | 50 | CNDP2 | | -1.2 |
| P50749 | Ras association domain-containing protein 2 | 26 | RASSF2 | | -1.2 |
| Q96F10 | Diamine acetyltransferase 2 | 9 | SAT2 | | -1.2 |
| H0YFW7 | Transmembrane 7 superfamily member 3 (Fragment) | 17 | TM7SF3 | | -1.2 |
| P11766 | Alcohol dehydrogenase class-3 | 38 | ADH5 | | -1.21 |
| P05026 | Sodium/potassium-transporting ATPase subunit beta-1 | 44 | ATP1B1 | | -1.21 |
| O75054 | Immunoglobulin superfamily member 3 | 18 | IGSF3 | | -1.21 |
| P12955 | Xaa-Pro dipeptidase | 21 | PEPD | | -1.21 |
| Q9H1Z4 | WD repeat-containing protein 13 | 7 | WDR13 | | -1.21 |
| Q9Y2D0 | Carbonic anhydrase 5B, mitochondrial | 11 | CA5B | | -1.22 |
| C9JIV5 | Sideroflexin-5 (Fragment) | 12 | SFXN5 | | -1.22 |
| P05556 | Integrin beta-1 | 35 | ITGB1 | | -1.23 |
| H0YNH8 | Uveal autoantigen with coiled-coil domains and ankyrin repeats | 8 | UACA | | -1.23 |
| K7ERV4 | PQ-loop repeat-containing protein 1 | 6 | PQLC1 | | -1.23 |
| Q07065 | Cytoskeleton-associated protein 4 | 68 | CKAP4 | | -1.24 |
| Q96NB2 | Sideroflexin-2 | 25 | SFXN2 | | -1.24 |
| Q3KQV9 | UDP-N-acetylhexosamine pyrophosphorylase-like protein 1 | 40 | UAP1L1 | | -1.24 |
| A0A1B0GVM2 | TRPM8 channel-associated factor 2C (Fragment) | 6 | TCAF2C | | -1.24 |
| Q9Y6D6 | Brefeldin A-inhibited guanine nucleotide-exchange protein 1 | 29 | ARFGEF1 | | -1.25 |
| P08729 | Keratin, type II cytoskeletal 7 | 60 | KRT7 | | -1.25 |
| P08236 | Beta-glucuronidase | 16 | GUSB | | -1.26 |
| H0YNQ8 | Unconventional myosin-Ie (Fragment) | 10 | MYO1E | | -1.26 |
| Q6UXG2 | UPF0577 protein KIAA1324 | 36 | KIAA1324 | | -1.27 |
| Q9HBH5 | Retinol dehydrogenase 14 | 50 | RDH14 | | -1.27 |
| Q9H0E2 | Toll-interacting protein | 13 | TOLLIP | | -1.27 |
| K7ELE1 | GPI ethanolamine phosphate transferase 1 | 9 | PIGN | | -1.27 |
| A0A0G2JIW1 | Heat shock 70 kDa protein 1B | 66 | HSPA1B | | -1.27 |
| P52799 | Ephrin-B2 | 4 | EFNB2 | | -1.28 |
| Q14254 | Flotillin-2 | 55 | FLOT2 | | -1.28 |
| Q00796 | Sorbitol dehydrogenase | 40 | SORD | | -1.28 |
| Q8WXF7 | Atlastin-1 | 25 | ATL1 | | -1.29 |
| P50895 | Basal cell adhesion molecule | 40 | BCAM | | -1.29 |
| Q6XQN6 | Nicotinate phosphoribosyltransferase | 50 | NAPRT1; NAPRT | | -1.29 |
| Q8IZQ5 | Selenoprotein H | 16 | C11orf31; SELENOH | | -1.3 |
| P16278 | Beta-galactosidase | 27 | GLB1 | | -1.3 |
| Q460N5 | Poly [ADP-ribose] polymerase 14 | 10 | PARP14 | | -1.3 |
| P10619 | Lysosomal protective protein | 15 | CTSA | | -1.31 |
| O75955 | Flotillin-1 | 66 | FLOT1 | | -1.31 |
| Q86UK0 | ATP-binding cassette sub-family A member 12 | 10 | ABCA12 | | -1.32 |
| P78310 | Coxsackievirus and adenovirus receptor | 17 | CXADR | | -1.32 |
| P78386 | Keratin, type II cuticular Hb5 | 10 | KRT85 | | -1.32 |
| D6RIF6 | SLAIN motif-containing protein 2 | 17 | SLAIN2 | | -1.32 |
| Q92508 | Piezo-type mechanosensitive ion channel component 1 | 4 | PIEZO1 | | -1.33 |
| Q86SK9 | Stearoyl-CoA desaturase 5 | 9 | SCD5 | | -1.33 |
| Q96RF0 | Sorting nexin-18 | 9 | SNX18 | | -1.33 |
| G5E9G6 | E3 ubiquitin-protein ligase TRIP12 | 17 | TRIP12 | | -1.33 |
| P28799 | Granulins | 20 | GRN | | -1.34 |
| P11717 | Cation-independent mannose-6-phosphate receptor | 34 | IGF2R | | -1.34 |
| Q9HAT2 | Sialate O-acetylesterase | 14 | SIAE | | -1.34 |
| Q96S66 | Chloride channel CLIC-like protein 1 | 36 | CLCC1 | | -1.35 |
| Q8TE82 | SH3 domain and tetratricopeptide repeat-containing protein 1 | 2 | SH3TC1 | | -1.35 |
| Q8NCC3 | Group XV phospholipase A2 | 26 | PLA2G15 | | -1.36 |
| P40306 | Proteasome subunit beta type-10 | 4 | PSMB10 | | -1.36 |
| O95716 | Ras-related protein Rab-3D | 50 | RAB3D | | -1.36 |
| Q9BUH6 | Protein PAXX | 29 | C9orf142; PAXX | | -1.37 |
| Q14517 | Protocadherin Fat 1 | 3 | FAT1 | | -1.37 |
| Q8TE68 | Epidermal growth factor receptor kinase substrate 8-like protein 1 | 35 | EPS8L1 | | -1.39 |
| Q9Y6U3 | Adseverin | 5 | SCIN | | -1.39 |
| Q04912 | Macrophage-stimulating protein receptor | 7 | MST1R | | -1.39 |
| Q9HCN3 | Post-GPI attachment to proteins factor 6 | 3 | TMEM8A | | -1.4 |
| Q96SQ9 | Cytochrome P450 2S1 | 7 | CYP2S1 | | -1.41 |
| Q6ZN40 | Tropomyosin 1 (Alpha), isoform CRA_f | 39 | TPM1 | | -1.41 |
| Q8NCL4 | Polypeptide N-acetylgalactosaminyltransferase 6 | 22 | GALNT6 | | -1.42 |
| Q96HR9 | Receptor expression-enhancing protein 6 | 23 | REEP6 | | -1.42 |
| P27105 | Erythrocyte band 7 integral membrane protein | 40 | STOM | | -1.43 |
| Q6Y288 | Beta-1,3-glucosyltransferase | 3 | B3GALTL; B3GLCT | | -1.44 |
| E9PDI2 | Adenylyl cyclase-associated protein | 27 | CAP2 | | -1.44 |
| P11279 | Lysosome-associated membrane glycoprotein 1 | 16 | LAMP1 | | -1.45 |
| P08133 | Annexin A6 | 59 | ANXA6 | | -1.46 |
| P15848 | Arylsulfatase B | 3 | ARSB | | -1.46 |
| Q9H9R9 | Dysbindin domain-containing protein 1 | 11 | DBNDD1 | | -1.46 |
| Q9C0K1 | Zinc transporter ZIP8 | 6 | SLC39A8 | | -1.46 |
| O94886 | CSC1-like protein 1 | 13 | TMEM63A | | -1.46 |
| P27701 | CD82 antigen | 8 | CD82 | | -1.47 |
| Q99523 | Sortilin | 14 | SORT1 | | -1.47 |
| Q9H008 | Phospholysine phosphohistidine inorganic pyrophosphate phosphatase | 11 | LHPP | | -1.48 |
| P31939 | Bifunctional purine biosynthesis protein PURH | 65 | ATIC | | -1.5 |
| Q9H8J5 | MANSC domain-containing protein 1 | 14 | MANSC1 | | -1.51 |
| A8MU27 | Small ubiquitin-related modifier 3 | 19 | SUMO3 | | -1.51 |
| O00462 | Beta-mannosidase | 31 | MANBA | | -1.52 |
| Q02818 | Nucleobindin-1 | 46 | NUCB1 | | -1.52 |
| Q92896 | Golgi apparatus protein 1 | 41 | GLG1 | | -1.53 |
| Q8TCU6 | Phosphatidylinositol 3,4,5-trisphosphate-dependent Rac exchanger 1 protein | 37 | PREX1 | | -1.53 |
| O14745 | Na(+)/H(+) exchange regulatory cofactor NHE-RF1 | 78 | SLC9A3R1 | | -1.54 |
| P08758 | Annexin A5 | 78 | ANXA5 | | -1.55 |
| Q06828 | Fibromodulin | 9 | FMOD | | -1.55 |
| O75781 | Paralemmin-1 | 21 | PALM | | -1.56 |
| Q15847 | Adipogenesis regulatory factor | 80 | ADIRF; C10orf116 | | -1.57 |
| Q8NBQ5 | Estradiol 17-beta-dehydrogenase 11 | 23 | HSD17B11 | | -1.57 |
| Q9BZL4 | Protein phosphatase 1 regulatory subunit 12C | 13 | PPP1R12C | | -1.57 |
| P58107 | Epiplakin | 51 | EPPK1 | | -1.57 |
| P32456 | Guanylate-binding protein 2 | 34 | GBP2 | | -1.58 |
| P18827 | Syndecan-1 | 20 | SDC1 | | -1.58 |
| P51689 | Arylsulfatase D | 5 | ARSD | | -1.6 |
| Q96N66 | Lysophospholipid acyltransferase 7 | 20 | MBOAT7 | | -1.61 |
| A0A286YFF7 | Palmitoyl-protein thioesterase 1 | 20 | PPT1 | | -1.61 |
| P06865 | Beta-hexosaminidase subunit alpha | 29 | HEXA | | -1.62 |
| O75121 | Microfibrillar-associated protein 3-like | 11 | MFAP3L | | -1.62 |
| Q8TD43 | Transient receptor potential cation channel subfamily M member 4 | 17 | TRPM4 | | -1.62 |
| P30038 | Delta-1-pyrroline-5-carboxylate dehydrogenase, mitochondrial | 46 | ALDH4A1 | | -1.63 |
| P0DP91 | Chimeric ERCC6-PGBD3 protein | 9 | ERCC6 | | -1.63 |
| P10600 | Transforming growth factor beta-3 | 6 | TGFB3 | | -1.63 |
| P43007 | Neutral amino acid transporter A | 31 | SLC1A4 | | -1.65 |
| C9JWV9 | Protein lifeguard 3 (Fragment) | 8 | TMBIM1 | | -1.65 |
| Q9P1Q0 | Vacuolar protein sorting-associated protein 54 | 2 | VPS54 | | -1.66 |
| P01034 | Cystatin-C | 19 | CST3 | | -1.67 |
| A0A087WUQ6 | Glutathione peroxidase | 50 | GPX1 | | -1.67 |
| Q9NSY1 | BMP-2-inducible protein kinase | 5 | BMP2K | | -1.68 |
| P23142 | Fibulin-1 | 12 | FBLN1 | | -1.71 |
| B1ANG9 | Guanylate kinase | 34 | GUK1 | | -1.71 |
| P35670 | Copper-transporting ATPase 2 | 14 | ATP7B | | -1.75 |
| F8VU11 | PRP40 pre-mRNA processing factor 40 homolog B (Yeast), isoform CRA_a | 3 | PRPF40B | | -1.75 |
| P98164 | Low-density lipoprotein receptor-related protein 2 | 4 | LRP2 | | -1.76 |
| Q8NGA1 | Olfactory receptor 1M1 | 2 | OR1M1 | | -1.77 |
| P10909 | Clusterin | 24 | CLU | | -1.78 |
| K7ELM0 | SEC14-like protein 1 (Fragment) | 34 | SEC14L1 | | -1.78 |
| E7EX44 | Caldesmon | 24 | CALD1 | | -1.78 |
| K7EIW2 | Alpha-N-acetylgalactosaminide alpha-2,6-sialyltransferase 2 (Fragment) | 37 | ST6GALNAC2 | | -1.79 |
| O00754 | Lysosomal alpha-mannosidase | 23 | MAN2B1 | | -1.8 |
| Q969X5 | Endoplasmic reticulum-Golgi intermediate compartment protein 1 | 39 | ERGIC1 | | -1.82 |
| Q9UHG2 | ProSAAS | 38 | PCSK1N | | -1.82 |
| P26006 | Integrin alpha-3 | 12 | ITGA3 | | -1.83 |
| B9EJG8 | Transmembrane protein 150C | 6 | TMEM150C | | -1.83 |
| Q92503 | SEC14-like protein 1 | 28 | SEC14L1 | | -1.84 |
| K7EL21 | Calcyphosine, isoform CRA_b | 36 | CAPS | | -1.85 |
| P02792 | Ferritin light chain | 9 | FTL | | -1.86 |
| H9KV31 | Neural cell adhesion molecule 2 | 17 | NCAM2 | | -1.87 |
| Q9Y2J8 | Protein-arginine deiminase type-2 | 38 | PADI2 | | -1.89 |
| A0A087X1Z2 | EF-hand domain-containing protein D1 | 27 | EFHD1 | | -1.89 |
| E5RK69 | Annexin | 55 | ANXA6 | | -1.9 |
| K7ERP4 | Glutathione peroxidase (Fragment) | 39 | GPX4 | | -1.94 |
| O95484 | Claudin-9 | 11 | CLDN9 | | -1.96 |
| G3V3E8 | NPC intracellular cholesterol transporter 2 | 37 | NPC2 | | -1.97 |
| Q96CX6 | Leucine-rich repeat-containing protein 58 | 8 | LRRC58 | | -2 |
| P18065 | Insulin-like growth factor-binding protein 2 | 23 | IGFBP2 | | -2.01 |
| P37059 | Estradiol 17-beta-dehydrogenase 2 | 28 | HSD17B2 | | -2.08 |
| Q9H1U4 | Multiple epidermal growth factor-like domains protein 9 | 16 | MEGF9 | | -2.09 |
| Q5SPY9 | Neural proliferation differentiation and control protein 1 | 21 | NPDC1 | | -2.09 |
| Q9NRW3 | DNA dC->dU-editing enzyme APOBEC-3C | 17 | APOBEC3C | | -2.11 |
| Q08AI8 | Uncharacterized protein C2orf54 | 4 | C2orf54 | | -2.11 |
| O00204 | Sulfotransferase family cytosolic 2B member 1 | 39 | SULT2B1 | | -2.13 |
| Q3SY77 | UDP-glucuronosyltransferase 3A2 | 11 | UGT3A2 | | -2.14 |
| J3KPQ0 | Fibroblast growth factor receptor | 7 | FGFR4 | | -2.15 |
| Q14764 | Major vault protein | 20 | MVP | | -2.16 |
| A0A024R6I7 | Alpha-1-antitrypsin | 33 | SERPINA1 | | -2.16 |
| A0A0G2JN42 | Mucin-6 | 10 | MUC6 | | -2.17 |
| Q14894 | Ketimine reductase mu-crystallin | 13 | CRYM | | -2.2 |
| C9JL73 | V-type proton ATPase subunit B, kidney isoform | 32 | ATP6V1B1 | | -2.24 |
| P33908 | Mannosyl-oligosaccharide 1,2-alpha-mannosidase IA | 22 | MAN1A1 | | -2.28 |
| P98088 | Mucin-5AC | 4 | MUC5AC | | -2.3 |
| Q15833 | Syntaxin-binding protein 2 | 12 | STXBP2 | | -2.3 |
| P19440 | Glutathione hydrolase 1 proenzyme | 32 | GGT1 | | -2.32 |
| K7EL81 | Protein phosphatase 1 regulatory subunit 12C (Fragment) | 14 | PPP1R12C | | -2.39 |
| P05091 | Aldehyde dehydrogenase, mitochondrial | 53 | ALDH2 | | -2.4 |
| P80404 | 4-aminobutyrate aminotransferase, mitochondrial | 52 | ABAT | | -2.41 |
| O15296 | Arachidonate 15-lipoxygenase B | 54 | ALOX15B | | -2.43 |
| Q6UW68 | Transmembrane protein 205 | 27 | TMEM205 | | -2.43 |
| Q9Y426 | C2 domain-containing protein 2 | 2 | C2CD2 | | -2.44 |
| B5MDU6 | Lipid droplet-associated hydrolase | 10 | LDAH | | -2.44 |
| P19075 | Tetraspanin-8 | 12 | TSPAN8 | | -2.55 |
| A8MTF8 | Protein FAM3B | 6 | FAM3B | | -2.6 |
| P02760 | Protein AMBP | 45 | AMBP | | -2.67 |
| O95833 | Chloride intracellular channel protein 3 | 17 | CLIC3 | | -2.69 |
| P04155 | Trefoil factor 1 | 55 | TFF1 | | -2.72 |
| Q08380 | Galectin-3-binding protein | 36 | LGALS3BP | | -2.77 |
| Q6PEY2 | Tubulin alpha-3E chain | 43 | TUBA3E | | -2.77 |
| Q9UQC9 | Calcium-activated chloride channel regulator 2 | 6 | CLCA2 | | -2.8 |
| K7EQZ3 | Uncharacterized protein (Fragment) | 32 | N/A | | -2.81 |
| P98095 | Fibulin-2 | 17 | FBLN2 | | -2.84 |
| Q13268 | Dehydrogenase/reductase SDR family member 2, mitochondrial | 52 | DHRS2 | | -2.91 |
| Q9BRK3 | Matrix remodeling-associated protein 8 | 17 | MXRA8 | | -2.92 |
| P20061 | Transcobalamin-1 | 30 | TCN1 | | -3.08 |
| Q9NX02 | NACHT, LRR and PYD domains-containing protein 2 | 21 | NLRP2 | | -3.31 |
| Q07654 | Trefoil factor 3 | 38 | TFF3 | | -3.44 |
| P21266 | Glutathione S-transferase Mu 3 | 69 | GSTM3 | | -3.46 |
| Q16772 | Glutathione S-transferase A3 | 12 | GSTA3 | | -3.57 |

Note: a Coverage represents the percentage of the protein sequence covered by identified peptides; b Log2 fold-change represents the relative protein abundance of 361-PBDr versus parental MDA-MB-361 cells.
